# Supplementary material for: Identification of Prognostic Genes in the Tumor Microenvironment of Hepatocellular Carcinoma
Source: Front Immunol. 2021 Apr 7;12:653836. doi: 10.3389/fimmu.2021.653836 (PMC8059369; doi:10.3389/fimmu.2021.653836)
Supplement: Supplementary Table 1 — The immune/stromal/Estimate scores and tumor purity of HCC were calculated by using ESTIMATE algorithm. [file Table_1.XLSX]

## Sheet: scores
ID	StromalScore	ImmuneScore	ESTIMATEScore	TumorPurity
TCGA-GJ-A3OU-01A-31R-A38B-07	907.54	2645.77	3553.31	0.429757
TCGA-G3-A7M9-01A-23R-A352-07	-1407.2	-375.777	-1782.98	0.94166
TCGA-ED-A627-01A-12R-A311-07	722.498	1937.92	2660.42	0.544079
TCGA-DD-AACB-01A-11R-A41C-07	-738.201	1433.5	695.299	0.760282
TCGA-CC-5264-01A-01R-A131-07	-1046.94	62.5018	-984.433	0.895838
TCGA-DD-AAW3-01A-11R-A41C-07	-969.019	-338.064	-1307.08	0.915872
TCGA-DD-AA3A-01A-11R-A37K-07	-1530.18	-65.196	-1595.37	0.932036
TCGA-DD-AAEI-01A-11R-A41C-07	-693.16	738.771	45.6115	0.818683
TCGA-DD-AADF-01A-11R-A41C-07	-1213.02	283.706	-929.31	0.892213
TCGA-BC-A216-11A-11R-A155-07	50.4909	1087.14	1137.63	0.716532
TCGA-UB-A7MA-01A-11R-A33R-07	-868.261	-52.3357	-920.597	0.891634
TCGA-EP-A3JL-01A-11R-A213-07	-40.0571	1357.69	1317.63	0.697853
TCGA-DD-AACZ-01A-11R-A41C-07	-500.886	2079.5	1578.61	0.66991
TCGA-2Y-A9HA-01A-11R-A39D-07	-1062.88	-67.23	-1130.11	0.905135
TCGA-ED-A82E-01A-11R-A352-07	-420.357	240.733	-179.624	0.837218
TCGA-ED-A66Y-01A-11R-A311-07	-1274.17	-870.173	-2144.34	0.95818
TCGA-DD-A1EE-11A-11R-A131-07	37.0718	1351.21	1388.28	0.690388
TCGA-DD-AACF-01A-11R-A41C-07	-1051.56	691.312	-360.247	0.851421
TCGA-MI-A75G-01A-11R-A32O-07	-1144.34	-312.571	-1456.91	0.924479
TCGA-DD-AAEG-01A-11R-A39D-07	-1046.88	-257.324	-1304.2	0.915702
TCGA-DD-A3A8-11A-11R-A22L-07	-268.88	907.075	638.195	0.7657
TCGA-DD-AAD2-01A-11R-A41C-07	255.901	1009.59	1265.49	0.703315
TCGA-ZS-A9CF-02A-11R-A38B-07	-919.072	122.366	-796.706	0.883254
TCGA-UB-A7MB-01A-11R-A33R-07	-1302.51	-495.302	-1797.81	0.942391
TCGA-DD-AACQ-01A-11R-A41C-07	-1535.37	-575.324	-2110.69	0.956755
TCGA-2Y-A9GW-01A-11R-A38B-07	0.373676	1490.52	1490.9	0.679413
TCGA-DD-A11D-11A-12R-A131-07	98.1445	1555.16	1653.3	0.66173
TCGA-G3-A3CG-01A-11R-A213-07	-464.594	437.335	-27.2592	0.824779
TCGA-DD-AAEH-01A-11R-A41C-07	-234.011	1490.23	1256.21	0.704282
TCGA-G3-A5SI-01A-31R-A27V-07	-1098.79	-523.281	-1622.07	0.933449
TCGA-BC-4072-01B-11R-A155-07	-356.657	1394.03	1037.37	0.72672
TCGA-BC-A10Q-11A-11R-A131-07	-270.04	464.743	194.703	0.805921
TCGA-KR-A7K2-01A-12R-A33R-07	-430.133	583.191	153.058	0.809525
TCGA-DD-A3A6-11A-11R-A22L-07	-1122.76	-471.079	-1593.84	0.931954
TCGA-RC-A6M3-01A-11R-A32O-07	-1455.43	234.518	-1220.92	0.910721
TCGA-EP-A3RK-01A-11R-A22L-07	-146.059	1781.09	1635.03	0.663738
TCGA-UB-A7MC-01A-11R-A33R-07	-1385.7	-506.966	-1892.66	0.946957
TCGA-MI-A75H-01A-11R-A32O-07	-576.347	1051.68	475.329	0.780857
TCGA-DD-AADY-01A-11R-A41C-07	-707	-426.439	-1133.44	0.905342
TCGA-BC-A10W-01A-11R-A131-07	-668.048	475.215	-192.834	0.838277
TCGA-DD-AADN-01A-11R-A41C-07	-1169.21	2017.54	848.325	0.7455
TCGA-DD-A1EC-11A-11R-A131-07	186.393	884.878	1071.27	0.723293
TCGA-DD-AAVX-01A-11R-A41C-07	-529.832	964.954	435.122	0.78453
TCGA-QA-A7B7-01A-11R-A32O-07	-1373.3	-70.1592	-1443.46	0.923724
TCGA-G3-A25Z-01A-11R-A16W-07	-509.499	427.947	-81.5521	0.829259
TCGA-DD-A39V-01A-11R-A213-07	-445.989	1388.62	942.633	0.736202
TCGA-5C-A9VH-01A-11R-A37K-07	-321.223	43.1866	-278.036	0.84503
TCGA-ZP-A9D4-01A-11R-A37K-07	-1015.84	-241.483	-1257.33	0.912915
TCGA-G3-AAV6-01A-21R-A37K-07	-1136.52	-349.989	-1486.5	0.926126
TCGA-DD-A4NG-01A-11R-A27V-07	-888.455	461.926	-426.529	0.856484
TCGA-BC-A10X-01A-11R-A131-07	330.615	859.368	1189.98	0.711151
TCGA-DD-A1EF-01A-11R-A131-07	-682.192	603.686	-78.5055	0.829009
TCGA-G3-A5SL-01A-11R-A27V-07	-717.057	-74.173	-791.23	0.882876
TCGA-EP-A12J-01A-11R-A131-07	-908.701	21.9141	-886.787	0.889376
TCGA-T1-A6J8-01A-11R-A32O-07	-556.833	179.683	-377.149	0.85272
TCGA-G3-AAV0-01A-11R-A37K-07	-861.232	218.41	-642.822	0.872438
TCGA-CC-A9FV-01A-11R-A37K-07	1042.89	2269.13	3312.02	0.461463
TCGA-XR-A8TG-01A-11R-A36F-07	-528.65	271.888	-256.762	0.843356
TCGA-DD-A1EG-11A-11R-A213-07	-43.5418	1400.53	1356.98	0.693704
TCGA-ED-A8O5-01A-11R-A36F-07	-759.107	-213.478	-972.585	0.895063
TCGA-DD-AACO-01A-11R-A41C-07	-542.343	916.964	374.62	0.790006
TCGA-DD-A3A3-01A-11R-A22L-07	-1415.87	272.634	-1143.23	0.905952
TCGA-2Y-A9H6-01A-11R-A39D-07	-47.5923	1070.62	1023.03	0.728164
TCGA-LG-A9QD-01A-11R-A38B-07	-825.823	487.403	-338.421	0.849737
TCGA-FV-A496-01A-11R-A266-07	-1361.86	-601.55	-1963.41	0.950243
TCGA-DD-AAE0-01A-11R-A41C-07	-704.62	34.2492	-670.371	0.874407
TCGA-DD-AACI-01A-11R-A41C-07	-210.613	1875.8	1665.18	0.660421
TCGA-DD-AAD0-01A-11R-A41C-07	-1483.26	-266.776	-1750.04	0.940022
TCGA-WQ-AB4B-01A-11R-A41C-07	-310.83	616.511	305.681	0.79617
TCGA-DD-AACW-01A-11R-A41C-07	-1157.06	152.497	-1004.56	0.897147
TCGA-BD-A2L6-01A-11R-A213-07	-729.164	397.407	-331.757	0.84922
TCGA-DD-A3A6-01A-11R-A22L-07	635.761	1292.63	1928.39	0.630925
TCGA-DD-AAW1-01A-11R-A41C-07	-984.081	-163.034	-1147.12	0.906193
TCGA-FV-A3I0-01A-11R-A22L-07	-495.208	337.778	-157.431	0.835432
TCGA-DD-A39X-01A-11R-A213-07	-486.46	546.631	60.1712	0.817454
TCGA-3K-AAZ8-01A-12R-A39D-07	-1083.62	421.92	-661.702	0.873789
TCGA-K7-A5RF-01A-11R-A28V-07	270.262	1353.12	1623.39	0.665016
TCGA-DD-A115-01A-11R-A131-07	-374.76	442.374	67.6132	0.816824
TCGA-ED-A7PY-01A-11R-A33R-07	-1377.19	-271.184	-1648.38	0.934827
TCGA-ED-A66X-01A-11R-A311-07	311	923.775	1234.77	0.706513
TCGA-ZP-A9CY-01A-11R-A38B-07	-126.423	620.683	494.26	0.779118
TCGA-DD-AACG-01A-11R-A41C-07	-1260.11	764.891	-495.222	0.861645
TCGA-DD-A73B-01A-12R-A32O-07	-1209.1	-386.648	-1595.75	0.932056
TCGA-RC-A7S9-01A-11R-A33R-07	-1240.62	525.255	-715.37	0.877593
TCGA-BC-A10R-11A-11R-A131-07	-49.7795	1298.57	1248.79	0.705056
TCGA-BC-A10S-01A-22R-A131-07	-4.02593	1160.81	1156.78	0.714568
TCGA-DD-A4NB-01A-12R-A266-07	1003.19	881.006	1884.19	0.635944
TCGA-CC-A5UC-01A-11R-A28V-07	-304.271	386.723	82.4518	0.815566
TCGA-EP-A26S-01A-11R-A16W-07	-952.665	-326.428	-1279.09	0.914214
TCGA-K7-A6G5-01A-11R-A311-07	-403.983	845.26	441.277	0.78397
TCGA-2Y-A9H1-01A-11R-A38B-07	-914.584	1125.72	211.131	0.804491
TCGA-G3-A25S-01A-11R-A16W-07	-1084.4	640.699	-443.699	0.857782
TCGA-DD-AAE3-01A-11R-A41C-07	-235.266	397.927	162.661	0.808696
TCGA-2Y-A9H3-01A-11R-A38B-07	-202.953	1792.41	1589.45	0.668727
TCGA-CC-5261-01A-01R-A131-07	50.5347	1123.3	1173.84	0.712815
TCGA-BC-A217-01A-11R-A155-07	-1180.36	685.461	-494.899	0.861621
TCGA-MI-A75C-01A-11R-A32O-07	-1497.72	611.681	-886.042	0.889326
TCGA-DD-AAVY-01A-11R-A41C-07	-1225.6	-315.669	-1541.27	0.929129
TCGA-DD-AADG-01A-11R-A41C-07	-1101.26	-435.733	-1536.99	0.928896
TCGA-2Y-A9H7-01A-11R-A39D-07	-1227.82	309.81	-918.013	0.891462
TCGA-FV-A3I1-11A-11R-A22L-07	-206.571	787.888	581.316	0.771044
TCGA-BW-A5NO-01A-11R-A27V-07	-743.863	508.361	-235.501	0.841675
TCGA-MR-A520-01A-11R-A266-07	-795.098	185.987	-609.11	0.870008
TCGA-FV-A3R2-01A-11R-A22L-07	-1135.54	115.853	-1019.68	0.898125
TCGA-DD-A1EG-01A-11R-A213-07	-55.0819	1390.73	1335.65	0.695956
TCGA-CC-A7IF-01A-11R-A33J-07	-1151.94	-374.849	-1526.79	0.928341
TCGA-DD-AADC-01A-11R-A41C-07	-1145.44	-136.75	-1282.19	0.914399
TCGA-EP-A2KA-01A-11R-A180-07	-830.793	1458.26	627.465	0.766712
TCGA-DD-A39Z-01A-11R-A213-07	-1428.31	-229.049	-1657.36	0.935294
TCGA-DD-AAE7-01A-11R-A41C-07	-263.936	871.955	608.019	0.768542
TCGA-BC-A10X-11A-11R-A131-07	-110.41	703.598	593.188	0.769933
TCGA-YA-A8S7-01A-11R-A37K-07	98.8046	1810.67	1909.48	0.633076
TCGA-CC-5260-01A-01R-A131-07	37.9601	679.291	717.251	0.758185
TCGA-BC-A3KF-01A-11R-A213-07	-878.812	-110.937	-989.749	0.896184
TCGA-DD-A3A3-11A-11R-A22L-07	314.589	1501.51	1816.1	0.643626
TCGA-DD-AADI-01A-11R-A41C-07	-229.428	1585.04	1355.61	0.693849
TCGA-DD-A3A5-01A-11R-A22L-07	-705.848	115.266	-590.583	0.868664
TCGA-FV-A3I1-01A-11R-A22L-07	-380.118	882.698	502.579	0.778352
TCGA-G3-A25U-01A-11R-A16W-07	-1141.28	-245.176	-1386.46	0.920487
TCGA-DD-AADB-01A-11R-A41C-07	-930.461	1228.37	297.912	0.796859
TCGA-G3-AAV1-01A-11R-A38B-07	-808.537	-59.9313	-868.468	0.888144
TCGA-G3-AAUZ-01A-11R-A38B-07	-430.058	1030.32	600.258	0.76927
TCGA-G3-AAV4-01A-11R-A38B-07	-977.499	-120.144	-1097.64	0.903098
TCGA-FV-A3R3-01A-11R-A22L-07	417.305	808.465	1225.77	0.707448
TCGA-EP-A12J-11A-11R-A131-07	15.3261	934.13	949.456	0.735524
TCGA-BC-A10T-11A-11R-A131-07	-166.889	835.394	668.504	0.762831
TCGA-2Y-A9H4-01A-11R-A38B-07	-837.523	567.57	-269.952	0.844395
TCGA-CC-A3M9-01A-11R-A213-07	861.451	2873.21	3734.66	0.405572
TCGA-DD-A4NJ-01A-11R-A27V-07	-236.395	844.504	608.109	0.768533
TCGA-DD-AACH-01A-11R-A41C-07	-804.426	335.945	-468.481	0.859646
TCGA-CC-A8HT-01A-11R-A36F-07	-1111.89	808.163	-303.723	0.84704
TCGA-DD-AAEB-01A-11R-A41C-07	-831.229	372.481	-458.748	0.858915
TCGA-G3-A3CH-11A-11R-A22L-07	-41.4774	1611.24	1569.76	0.670874
TCGA-DD-A4NE-01A-11R-A27V-07	-768.446	-257.231	-1025.68	0.898512
TCGA-DD-A1EI-11A-11R-A131-07	-100.241	764.297	664.056	0.763253
TCGA-DD-A114-01A-11R-A131-07	256.525	1824.54	2081.06	0.61338
TCGA-5C-AAPD-01A-21R-A39D-07	-307.449	1730.86	1423.41	0.686649
TCGA-DD-A1EA-01A-11R-A131-07	-957.168	711.366	-245.802	0.842491
TCGA-XR-A8TD-01A-12R-A39D-07	372.805	1923.31	2296.12	0.588147
TCGA-ZS-A9CG-01A-11R-A37K-07	-784.666	78.3451	-706.32	0.876955
TCGA-FV-A23B-11A-11R-A16W-07	290.748	1692.16	1982.91	0.624695
TCGA-2Y-A9H2-01A-12R-A38B-07	-1042.26	570.281	-471.977	0.859908
TCGA-FV-A2QQ-01A-11R-A22L-07	-497.124	859.158	362.034	0.791138
TCGA-CC-A3MC-01A-11R-A22L-07	-590.679	314.927	-275.752	0.844851
TCGA-DD-AAE1-01A-11R-A41C-07	-1188.08	326.557	-861.52	0.887675
TCGA-DD-A4NN-01A-11R-A28V-07	-887.508	-439.676	-1327.18	0.917052
TCGA-DD-AACK-01A-11R-A41C-07	-1102.54	125.111	-977.425	0.89538
TCGA-G3-A5SK-01A-11R-A27V-07	-349.297	998.883	649.587	0.764624
TCGA-DD-A4NP-01A-11R-A28V-07	-771.549	180.3	-591.249	0.868713
TCGA-BC-A10U-11A-11R-A131-07	-302.734	559.756	257.022	0.800471
TCGA-FV-A2QR-11A-11R-A213-07	304.027	1782.07	2086.1	0.612796
TCGA-DD-AADL-01A-11R-A41C-07	-1275.62	-356.877	-1632.5	0.933997
TCGA-4R-AA8I-01A-11R-A38B-07	-789.135	163.254	-625.881	0.87122
TCGA-KR-A7K8-01A-11R-A33J-07	-226.859	1629.49	1402.63	0.688863
TCGA-DD-A73A-01A-12R-A32O-07	-949.252	860.482	-88.7703	0.82985
TCGA-BC-A8YO-01A-11R-A37K-07	-956.009	1212.84	256.828	0.800488
TCGA-DD-A3A4-11A-11R-A22L-07	186.326	1265.29	1451.62	0.683633
TCGA-2Y-A9GY-01A-11R-A38B-07	-1007.68	1766.26	758.58	0.754215
TCGA-DD-AAVR-01A-11R-A41C-07	360.266	1716.87	2077.14	0.613835
TCGA-DD-A11C-11A-11R-A131-07	-166.542	882.889	716.347	0.758272
TCGA-DD-A3A2-11A-11R-A213-07	-199.901	695.512	495.612	0.778994
TCGA-DD-AAE6-01A-11R-A41C-07	-1665.88	-908.901	-2574.78	0.974337
TCGA-G3-A25T-01A-11R-A16W-07	-501.062	327.923	-173.139	0.836697
TCGA-BD-A3EP-01A-11R-A22L-07	140.133	1481.38	1621.51	0.665221
TCGA-DD-A114-11A-12R-A131-07	84.8611	1908.09	1992.95	0.623543
TCGA-FV-A23B-01A-11R-A16W-07	-706.636	479.006	-227.63	0.841051
TCGA-DD-A113-11A-12R-A131-07	-423.409	416.065	-7.34319	0.823122
TCGA-DD-AACT-01A-11R-A41C-07	-397.373	952.156	554.783	0.773518
TCGA-CC-A7IL-01A-11R-A33R-07	-1607.08	-492.656	-2099.73	0.956286
TCGA-G3-AAV7-01A-11R-A38B-07	-713.666	817.475	103.81	0.813748
TCGA-DD-A11D-01A-11R-A131-07	-695.096	20.6693	-674.427	0.874695
TCGA-CC-A9FU-01A-11R-A37K-07	-1636.45	-107.131	-1743.58	0.939698
TCGA-2Y-A9HB-01A-11R-A39D-07	-282.09	948.354	666.264	0.763044
TCGA-DD-AAC9-01A-11R-A41C-07	127.515	1125.5	1253.01	0.704616
TCGA-DD-AAVU-01A-11R-A41C-07	-1241.14	-3.45844	-1244.6	0.912151
TCGA-DD-AAEK-01A-11R-A41C-07	-213.694	1535.26	1321.57	0.697439
TCGA-CC-5258-01A-01R-A131-07	-599.192	613.18	13.9885	0.82134
TCGA-FV-A495-01A-11R-A266-07	21.6713	1323.65	1345.32	0.694937
TCGA-UB-A7MF-01A-11R-A33J-07	-660.988	1826.8	1165.82	0.71364
TCGA-CC-A7IK-01A-12R-A33R-07	-1358.02	-595.097	-1953.12	0.949771
TCGA-DD-AAED-01A-12R-A41C-07	-1586.31	156.068	-1430.24	0.922979
TCGA-FV-A3R2-11A-11R-A22L-07	-90.2713	1413.51	1323.24	0.697263
TCGA-CC-5262-01A-01R-A131-07	200.284	1177.62	1377.91	0.691489
TCGA-DD-A39Z-11A-21R-A213-07	-566.132	107.721	-458.411	0.85889
TCGA-LG-A6GG-01A-11R-A311-07	-1138.03	-105.212	-1243.25	0.912069
TCGA-G3-A7M6-01A-11R-A33R-07	-686.813	250.601	-436.212	0.857217
TCGA-DD-A116-11A-12R-A26B-07	-265.484	994.882	729.398	0.757021
TCGA-2Y-A9GV-01A-11R-A38B-07	-163.43	890.929	727.5	0.757203
TCGA-FV-A3I0-11A-11R-A22L-07	-644.032	310.617	-333.414	0.849349
TCGA-DD-AACJ-01A-11R-A41C-07	-1311.49	-47.0489	-1358.54	0.918878
TCGA-DD-A3A2-01A-11R-A213-07	-614.734	151.221	-463.513	0.859273
TCGA-ED-A97K-01A-21R-A38B-07	-386.42	518.455	132.035	0.811332
TCGA-BC-A10Z-11A-11R-A131-07	-514.038	602.971	88.933	0.815015
TCGA-CC-A5UD-01A-11R-A28V-07	-1212.35	-241.575	-1453.92	0.924312
TCGA-DD-A119-11A-11R-A131-07	119.074	1039.18	1158.25	0.714417
TCGA-DD-AAE9-01A-11R-A41C-07	-1435.44	-3.38484	-1438.83	0.923464
TCGA-DD-AAC8-01A-11R-A41C-07	-970.83	401.052	-569.778	0.867147
TCGA-WJ-A86L-01A-12R-A39D-07	-1420.72	-171.038	-1591.76	0.931844
TCGA-DD-A4NF-01A-11R-A27V-07	-900.313	-447.58	-1347.89	0.91826
TCGA-DD-A1EB-01A-11R-A131-07	-626.92	89.9632	-536.957	0.864738
TCGA-GJ-A9DB-01A-11R-A37K-07	-251.217	342.838	91.6213	0.814786
TCGA-2Y-A9H9-01A-21R-A39D-07	-726.527	313.764	-412.763	0.855439
TCGA-DD-AAD5-01A-11R-A41C-07	-1012.93	825.415	-187.517	0.837851
TCGA-5R-AAAM-01A-12R-A41C-07	500.279	1105.16	1605.44	0.666981
TCGA-ED-A4XI-01A-11R-A266-07	169.094	1149.98	1319.07	0.697702
TCGA-BC-A10Y-01A-11R-A131-07	-885.92	431.423	-454.497	0.858596
TCGA-DD-A73E-01A-12R-A32O-07	-1221.86	-806.232	-2028.09	0.953158
TCGA-DD-AADK-01A-11R-A41C-07	-240.923	788.765	547.842	0.774163
TCGA-DD-A1EH-11A-11R-A131-07	-274.048	733.387	459.338	0.782321
TCGA-EP-A2KB-01A-11R-A180-07	-1175.19	-43.9062	-1219.1	0.91061
TCGA-XR-A8TF-01A-11R-A36F-07	-1153.52	-131.962	-1285.48	0.914594
TCGA-DD-AADM-01A-11R-A41C-07	-627.932	511.372	-116.56	0.83212
TCGA-GJ-A6C0-01A-12R-A311-07	-594.722	1103.19	508.471	0.777809
TCGA-DD-A1EJ-01A-11R-A155-07	-1089.98	281.09	-808.891	0.884091
TCGA-2V-A95S-01A-11R-A37K-07	-464.135	2187.99	1723.85	0.65393
TCGA-K7-AAU7-01A-11R-A38B-07	-301.385	650.866	349.481	0.792263
TCGA-DD-AAW0-01A-11R-A41C-07	-39.2679	1089.3	1050.03	0.725442
TCGA-XR-A8TE-01A-11R-A36F-07	-572.728	-11.0594	-583.788	0.86817
TCGA-G3-A6UC-01A-21R-A33J-07	-1222.01	-299.09	-1521.1	0.92803
TCGA-BC-A112-01A-11R-A131-07	-308.571	474.911	166.34	0.808378
TCGA-ED-A459-01A-11R-A266-07	-909.769	540.468	-369.3	0.852118
TCGA-NI-A8LF-01A-11R-A36F-07	-421.618	46.9992	-374.618	0.852526
TCGA-BC-A5W4-01A-11R-A28V-07	-1510.01	-672.101	-2182.11	0.959752
TCGA-CC-A7IE-01A-21R-A38B-07	-703.825	1249.83	546.006	0.774334
TCGA-5R-AA1D-01A-11R-A38B-07	1184.88	1028.79	2213.67	0.597891
TCGA-CC-A7II-01A-11R-A33J-07	-811.961	-369.776	-1181.74	0.90833
TCGA-DD-AACA-02B-11R-A41C-07	-1436.26	-661.186	-2097.45	0.956188
TCGA-DD-A73C-01A-12R-A33J-07	-168.095	223.793	55.6972	0.817832
TCGA-DD-A11A-11A-11R-A131-07	143.536	1488.51	1632.04	0.664066
TCGA-EP-A26S-11A-12R-A16W-07	-159.986	1111.91	951.922	0.735279
TCGA-KR-A7K7-01A-11R-A33J-07	-1161.14	1202.42	41.2794	0.819048
TCGA-DD-AAVP-01A-11R-A41C-07	-675.646	78.8789	-596.767	0.869114
TCGA-DD-AAD1-01A-11R-A41C-07	247.986	1364.46	1612.45	0.666214
TCGA-DD-AADS-01A-11R-A41C-07	-760.997	1426.36	665.365	0.763129
TCGA-DD-A3A1-01A-11R-A213-07	-1086.59	901.014	-185.576	0.837695
TCGA-RC-A7SB-01A-21R-A352-07	-1099.32	16.8618	-1082.46	0.902139
TCGA-DD-AAVZ-01A-11R-A41C-07	-836.917	75.7187	-761.198	0.880798
TCGA-2Y-A9GT-01A-11R-A38B-07	-204.609	1524.92	1320.31	0.697571
TCGA-DD-AADQ-01A-11R-A41C-07	-1222.64	530.056	-692.582	0.875984
TCGA-DD-A119-01A-11R-A131-07	-406.79	328.099	-78.6911	0.829024
TCGA-DD-A4NO-01A-11R-A28V-07	-402.153	153.021	-249.133	0.842754
TCGA-BW-A5NP-01A-11R-A27V-07	-1409.93	-567.351	-1977.28	0.950875
TCGA-DD-A4NA-01A-11R-A266-07	-442.749	565.533	122.784	0.812126
TCGA-MI-A75E-01A-11R-A32O-07	-183.359	931.638	748.279	0.755207
TCGA-BC-A10Q-01A-11R-A131-07	-730.442	193.068	-537.374	0.864769
TCGA-DD-AAEE-01A-11R-A41C-07	-1024.23	-252.282	-1276.52	0.914061
TCGA-BC-A3KG-01A-11R-A213-07	-1339.24	-126.963	-1466.2	0.924998
TCGA-DD-A3A7-01A-11R-A22L-07	-1183.84	293.629	-890.208	0.889606
TCGA-CC-A8HV-01A-11R-A36F-07	-1293.1	-449.356	-1742.46	0.939642
TCGA-DD-AACN-01A-11R-A41C-07	-338.947	340.225	1.27818	0.822403
TCGA-G3-A25V-01A-11R-A16W-07	16.8276	1161.11	1177.94	0.712393
TCGA-DD-AAVS-01A-11R-A41C-07	-726.174	195.474	-530.7	0.864276
TCGA-CC-A3MB-01A-11R-A213-07	-1014.46	11.0438	-1003.41	0.897072
TCGA-DD-A3A1-11A-11R-A213-07	36.4209	1507.2	1543.62	0.673715
TCGA-ZP-A9D0-01A-11R-A37K-07	-774.63	-214.972	-989.603	0.896175
TCGA-DD-AAE2-01A-11R-A41C-07	-264.031	926.297	662.266	0.763423
TCGA-RG-A7D4-01A-12R-A33R-07	-1154.33	1538.88	384.545	0.789112
TCGA-DD-A4NK-01A-11R-A28V-07	-765.805	-114.822	-880.627	0.888963
TCGA-DD-A39W-01A-11R-A213-07	-1038.15	-72.1218	-1110.27	0.903893
TCGA-DD-AADJ-01A-11R-A41C-07	-1063.12	446.38	-616.74	0.87056
TCGA-DD-AACA-01A-11R-A41C-07	-1088.65	-255.839	-1344.49	0.918062
TCGA-CC-5263-01A-01R-A131-07	-847.686	627.147	-220.54	0.840487
TCGA-DD-A11C-01A-11R-A131-07	-136.658	452.435	315.777	0.795272
TCGA-DD-A4NL-01A-11R-A28V-07	-253.079	394.877	141.798	0.810494
TCGA-HP-A5N0-01A-11R-A28V-07	145.58	553.615	699.196	0.75991
TCGA-ZP-A9D1-01A-11R-A38B-07	-233.69	636.418	402.728	0.78747
TCGA-ES-A2HS-01A-11R-A180-07	-545.085	-19.9664	-565.051	0.866802
TCGA-UB-AA0U-01A-11R-A38B-07	8.37085	748.956	757.327	0.754336
TCGA-DD-AAD3-01A-11R-A41C-07	-7.399	702.88	695.481	0.760265
TCGA-BC-A10Y-11A-11R-A131-07	29.7949	1120.83	1150.63	0.7152
TCGA-BW-A5NQ-01A-11R-A27V-07	-859.886	1408.79	548.899	0.774065
TCGA-DD-A1EJ-11A-11R-A155-07	-139.519	1019.11	879.594	0.742433
TCGA-DD-A11B-01A-11R-A131-07	-922.613	-328.277	-1250.89	0.912529
TCGA-G3-A25Y-01A-11R-A16W-07	-215.857	583.337	367.48	0.790648
TCGA-DD-AACA-02A-11R-A41C-07	-989.443	-750.738	-1740.18	0.939527
TCGA-CC-A7IH-01A-11R-A33J-07	-1022.56	-480.905	-1503.47	0.927063
TCGA-MR-A8JO-01A-12R-A36F-07	758.38	1462.89	2221.27	0.596997
TCGA-2Y-A9GX-01A-11R-A38B-07	715.417	1717.96	2433.38	0.571733
TCGA-DD-AACS-01A-11R-A41C-07	-1284.66	-381.287	-1665.94	0.93574
TCGA-K7-A5RG-01A-11R-A28V-07	-257.947	2516.85	2258.9	0.592556
TCGA-DD-A1ED-01A-11R-A155-07	-136.844	1132.59	995.745	0.730904
TCGA-DD-AADV-01A-11R-A39D-07	-470.538	159.476	-311.062	0.847612
TCGA-DD-AAD8-01A-11R-A41C-07	-1027.51	110.257	-917.253	0.891412
TCGA-DD-A4NQ-01A-21R-A28V-07	-1010.63	618.874	-391.752	0.853838
TCGA-NI-A4U2-01A-11R-A28V-07	-515.025	172.087	-342.938	0.850086
TCGA-G3-AAV5-01A-11R-A37K-07	-1150.5	67.2839	-1083.22	0.902187
TCGA-G3-AAV2-01A-11R-A37K-07	-837.936	64.9713	-772.965	0.881614
TCGA-BC-A216-01A-11R-A155-07	-1035.1	864.061	-171.041	0.836528
TCGA-DD-AAEA-01A-11R-A41C-07	-1070.59	700.332	-370.255	0.852191
TCGA-EP-A2KC-01A-11R-A213-07	-851.809	118.032	-733.778	0.878885
TCGA-RC-A6M5-01A-11R-A32O-07	328.112	200.148	528.259	0.77598
TCGA-2Y-A9GU-01A-11R-A38B-07	-1058.96	-210.181	-1269.14	0.913622
TCGA-BC-A10T-01A-11R-A131-07	100.9	185.316	286.216	0.797896
TCGA-RC-A7SK-01A-11R-A352-07	-1206.78	-385.532	-1592.31	0.931873
TCGA-BC-A69H-01A-11R-A311-07	-869.075	915.595	46.5202	0.818606
TCGA-DD-AAVW-01A-11R-A41C-07	210.925	812.512	1023.44	0.728124
TCGA-DD-AADO-01A-11R-A41C-07	-840.606	1459.19	618.583	0.767549
TCGA-ZS-A9CD-01A-11R-A37K-07	-296.953	652.528	355.574	0.791717
TCGA-DD-AACU-01A-11R-A41C-07	-739.494	419.425	-320.068	0.848313
TCGA-G3-A7M5-01A-11R-A33R-07	-1004.63	353.205	-651.424	0.873054
TCGA-WQ-A9G7-01A-11R-A37K-07	-1336	-296.835	-1632.83	0.934014
TCGA-G3-A5SJ-01A-11R-A27V-07	-642.024	1246.16	604.14	0.768906
TCGA-O8-A75V-01A-11R-A32O-07	-266.604	1182.33	915.725	0.73887
TCGA-ED-A5KG-01A-11R-A27V-07	534.161	3210.43	3744.6	0.404238
TCGA-CC-A8HU-01A-11R-A36F-07	-1239.86	-254.868	-1494.73	0.926581
TCGA-BD-A3EP-11A-12R-A22L-07	-207.869	1235.53	1027.66	0.727698
TCGA-DD-AACV-01A-11R-A41C-07	-1451.21	-753.183	-2204.39	0.960665
TCGA-CC-A8HS-01A-11R-A36F-07	-1214.43	-428.692	-1643.12	0.934553
TCGA-BC-A10W-11A-11R-A131-07	-205.203	1179.57	974.364	0.733042
TCGA-CC-A123-01A-11R-A131-07	-911.217	351.449	-559.768	0.866415
TCGA-DD-A3A9-01A-11R-A266-07	-93.1589	861.606	768.447	0.753264
TCGA-DD-A4ND-01A-11R-A266-07	606.159	1158.07	1764.23	0.649434
TCGA-ZP-A9CV-01A-11R-A38B-07	-197.697	942.835	745.138	0.75551
TCGA-ED-A7XO-01A-11R-A352-07	-192.957	786.467	593.511	0.769903
TCGA-EP-A3RK-11A-11R-A22L-07	-422.033	387.997	-34.0361	0.825341
TCGA-ZP-A9D2-01A-11R-A38B-07	-562.036	227.712	-334.325	0.849419
TCGA-2Y-A9GZ-01A-11R-A39D-07	-1050.22	-420.713	-1470.93	0.925262
TCGA-DD-A11A-01A-11R-A131-07	-1112.99	-225.475	-1338.46	0.917711
TCGA-LG-A9QC-01A-11R-A37K-07	-996.093	-415.401	-1411.49	0.921917
TCGA-DD-A1EB-11A-11R-A131-07	-199.393	1003.99	804.595	0.749763
TCGA-DD-A4NV-01A-11R-A311-07	-259.465	231.164	-28.3011	0.824865
TCGA-CC-A7IG-01A-11R-A33J-07	-995.92	455.826	-540.094	0.864969
TCGA-DD-AADR-01A-11R-A41C-07	-871.713	545.697	-326.017	0.848775
TCGA-BC-A110-01A-11R-A131-07	628.231	1583.76	2211.99	0.598089
TCGA-DD-A118-01A-11R-A131-07	-397.932	24.4191	-373.513	0.852441
TCGA-UB-A7ME-01A-11R-A33J-07	-458.324	1191.48	733.156	0.756661
TCGA-DD-A4NI-01A-11R-A27V-07	-174.905	1026.32	851.419	0.745197
TCGA-G3-A3CI-01A-11R-A213-07	-388.656	959.738	571.082	0.772
TCGA-DD-AACY-01A-11R-A41C-07	-797.703	308.296	-489.407	0.861211
TCGA-2Y-A9H5-01A-11R-A38B-07	-342.667	257.081	-85.5862	0.82959
TCGA-ZS-A9CF-01A-11R-A38B-07	-907.516	378.119	-529.397	0.86418
TCGA-RC-A6M6-01A-11R-A32O-07	-1456.23	-35.3466	-1491.58	0.926407
TCGA-XR-A8TC-01A-11R-A36F-07	-852.986	-245.969	-1098.95	0.903181
TCGA-RC-A7SF-01A-11R-A352-07	-1020.15	298.727	-721.423	0.878018
TCGA-CC-A7IJ-01A-11R-A33R-07	818.748	1950.73	2769.47	0.530578
TCGA-DD-A1EL-01A-11R-A155-07	-1359.48	201.455	-1158.03	0.906869
TCGA-BC-A10Z-01A-11R-A131-07	-1538.51	-767.421	-2305.93	0.964697
TCGA-BC-4073-01B-02R-A131-07	-61.9582	1949.06	1887.1	0.635614
TCGA-G3-A5SM-01A-12R-A28V-07	43.6836	987.145	1030.83	0.727379
TCGA-DD-AAVQ-01A-11R-A41C-07	-344.132	2030.7	1686.57	0.658061
TCGA-CC-5259-01A-31R-A213-07	-1365.9	574.587	-791.312	0.882882
TCGA-DD-AAE4-01A-11R-A41C-07	-2.04641	1777.08	1775.03	0.648228
TCGA-DD-AACL-01A-11R-A41C-07	-548.012	1789.2	1241.19	0.705846
TCGA-DD-AADW-01A-11R-A39D-07	-573.82	-393.678	-967.498	0.89473
TCGA-DD-A118-11A-11R-A131-07	-291.224	1040.87	749.647	0.755076
TCGA-DD-A39Y-01A-11R-A213-07	-1249.02	-4.87534	-1253.89	0.912709
TCGA-ED-A7PZ-01A-11R-A33R-07	-1543.62	-553.583	-2097.2	0.956177
TCGA-DD-AAD6-01A-11R-A41C-07	-1499.83	39.1827	-1460.65	0.924688
TCGA-RC-A6M4-01A-11R-A32O-07	-1319.35	-680.225	-1999.58	0.951883
TCGA-KR-A7K0-01A-12R-A33R-07	-574.175	287.507	-286.668	0.845707
TCGA-DD-A73D-01A-12R-A32O-07	-1584.47	-689.94	-2274.41	0.963469
TCGA-DD-AADU-01A-11R-A41C-07	-1330.84	-21.7792	-1352.62	0.918535
TCGA-G3-A3CJ-01A-11R-A213-07	-862.894	230.06	-632.834	0.87172
TCGA-DD-A1EI-01A-11R-A131-07	-28.2468	508.781	480.534	0.780379
TCGA-DD-A4NS-01A-11R-A311-07	576.259	1239.75	1816.01	0.643636
TCGA-BD-A2L6-11A-21R-A213-07	519.055	2942.75	3461.81	0.441847
TCGA-ED-A7PX-01A-51R-A352-07	9.77022	370.921	380.691	0.78946
TCGA-BD-A3ER-01A-11R-A213-07	59.262	599.575	658.837	0.763748
TCGA-DD-A1EL-11A-11R-A155-07	5.51892	905.767	911.286	0.739309
TCGA-2Y-A9H0-01A-11R-A38B-07	-1129.92	796.38	-333.537	0.849358
TCGA-DD-AACP-01A-11R-A41C-07	-1683.34	-319.457	-2002.8	0.952028
TCGA-2Y-A9GS-01A-12R-A38B-07	-573.327	619.086	45.7587	0.818671
TCGA-5R-AA1C-01A-11R-A41C-07	-863.554	331.589	-531.966	0.86437
TCGA-DD-AACE-01A-11R-A41C-07	-770.353	-90.173	-860.526	0.887607
TCGA-WX-AA44-01A-11R-A39D-07	-973.423	366.419	-607.004	0.869856
TCGA-ED-A7XP-01A-11R-A352-07	-388.861	490.049	101.188	0.813971
TCGA-DD-A1EC-01A-21R-A131-07	-228.872	2452.51	2223.64	0.596718
TCGA-DD-AAVV-01A-11R-A41C-07	34.7348	1461.03	1495.76	0.678889
TCGA-2Y-A9H8-01A-11R-A39D-07	-975.412	917.843	-57.569	0.827286
TCGA-RC-A7SH-01A-11R-A38B-07	-1304.3	-430.461	-1734.76	0.939254
TCGA-DD-A39X-11A-11R-A213-07	-436.418	723.753	287.336	0.797796
TCGA-ZS-A9CE-01A-11R-A37K-07	-1253.94	-540.113	-1794.05	0.942206
TCGA-BC-A10U-01A-11R-A131-07	-1311.32	38.3043	-1273.02	0.913853
TCGA-ZP-A9CZ-01A-11R-A38B-07	-284.793	1149.05	864.259	0.743939
TCGA-DD-AAW2-01A-11R-A41C-07	-862.798	-268.061	-1130.86	0.905181
TCGA-G3-A25X-01A-11R-A16W-07	-131.135	1496.43	1365.29	0.692825
TCGA-DD-AADA-01A-11R-A41C-07	-335.41	1043.55	708.142	0.759056
TCGA-DD-AACD-01A-11R-A41C-07	-439.492	1053.12	613.629	0.768015
TCGA-G3-AAV3-01A-11R-A37K-07	-364.964	1376.59	1011.63	0.72931
TCGA-G3-A3CH-01A-11R-A22L-07	-474.939	583.876	108.938	0.81331
TCGA-G3-A3CK-01A-11R-A213-07	-751.53	706.088	-45.4429	0.826285
TCGA-5C-A9VG-01A-11R-A37K-07	-454.059	-330.404	-784.463	0.88241
TCGA-G3-A7M8-01A-11R-A33R-07	-329.421	280.809	-48.6125	0.826547
TCGA-DD-A4NR-01A-11R-A311-07	125.97	2330.72	2456.69	0.568922
TCGA-FV-A4ZP-01A-12R-A266-07	-793.322	1223.48	430.162	0.784982
TCGA-UB-AA0V-01A-11R-A38B-07	104.647	607.332	711.98	0.758689
TCGA-DD-A116-01A-11R-A131-07	-685.773	433.555	-252.217	0.842998
TCGA-DD-A39W-11A-11R-A213-07	-382.46	539.993	157.534	0.809139
TCGA-DD-A3A5-11A-11R-A22L-07	-914.64	-28.7493	-943.389	0.893144
TCGA-DD-A1EH-01A-11R-A131-07	-522.853	-121.763	-644.616	0.872566
TCGA-CC-A9FS-01A-11R-A37K-07	-1002.63	2.01921	-1000.61	0.89689
TCGA-DD-A1EK-01A-11R-A213-07	-409.747	799	389.253	0.788688
TCGA-CC-A3MA-01A-11R-A213-07	-509.908	-115.781	-625.688	0.871206
TCGA-DD-A4NH-01A-11R-A27V-07	-666.359	921.822	255.463	0.800609
TCGA-PD-A5DF-01A-11R-A27V-07	130.354	884.094	1014.45	0.729027
TCGA-UB-A7MD-01A-12R-A352-07	-294.65	932.213	637.563	0.76576
TCGA-BC-A69I-01A-11R-A311-07	-310.186	463.845	153.658	0.809473
TCGA-FV-A2QR-01A-11R-A213-07	-268.359	186.77	-81.5898	0.829262
TCGA-DD-AACC-01A-11R-A41C-07	87.3614	2643.14	2730.5	0.535418
TCGA-WX-AA47-01A-11R-A39D-07	-1442.32	-442.977	-1885.3	0.946609
TCGA-MI-A75I-01A-11R-A32O-07	-1212.51	187.732	-1024.78	0.898454
TCGA-ES-A2HT-11A-11R-A180-07	-183.029	1394.78	1211.75	0.7089
TCGA-BC-A110-11A-11R-A131-07	-270.186	933.51	663.324	0.763323
TCGA-ED-A8O6-01A-11R-A36F-07	-991.686	-11.4781	-1003.16	0.897056
TCGA-DD-A11B-11A-11R-A131-07	-177.866	559.468	381.602	0.789377
TCGA-CC-A1HT-01A-11R-A131-07	115.341	2125.9	2241.24	0.594643
TCGA-HP-A5MZ-01A-21R-A27V-07	593.878	1557.75	2151.63	0.605167
TCGA-DD-A113-01A-11R-A131-07	-776.531	488.343	-288.187	0.845826
TCGA-DD-A3A8-01A-11R-A22L-07	-1162.38	-194.793	-1357.17	0.918799
TCGA-DD-AADP-01A-11R-A39D-07	-567.358	361.343	-206.014	0.83933
TCGA-DD-A73G-01A-22R-A32O-07	-758.44	600.46	-157.98	0.835476
TCGA-G3-A7M7-01A-12R-A352-07	-845.955	-80.8107	-926.765	0.892044
TCGA-CC-A5UE-01A-11R-A28V-07	-1572.56	-29.6869	-1602.25	0.932401
TCGA-DD-AACX-01A-11R-A41C-07	-1320.19	173.64	-1146.55	0.906158
TCGA-DD-AADD-01A-11R-A41C-07	-1538.47	-118.34	-1656.81	0.935266
TCGA-DD-A73F-01A-11R-A32O-07	-201.395	1808.4	1607.01	0.66681
TCGA-CC-A9FW-01A-11R-A37K-07	-1393.06	144.868	-1248.19	0.912367
TCGA-DD-A39V-11A-11R-A213-07	-269.446	944.701	675.255	0.76219
TCGA-BC-A10R-01A-11R-A131-07	-128.863	-10.6964	-139.559	0.833987
TCGA-ES-A2HT-01A-12R-A180-07	-260.396	715.781	455.385	0.782682
TCGA-DD-A3A4-01A-11R-A22L-07	-925.35	-485.645	-1410.99	0.921889
TCGA-WX-AA46-01A-11R-A39D-07	-330.531	422.926	92.3952	0.81472
TCGA-DD-A1EE-01A-11R-A131-07	-1084.53	-255.333	-1339.86	0.917793
TCGA-FV-A4ZQ-01A-11R-A266-07	-1026.98	1773.93	746.949	0.755335
