# Supplementary material for: Identification of Prognostic Genes in the Tumor Microenvironment of Hepatocellular Carcinoma
Source: Front Immunol. 2021 Apr 7;12:653836. doi: 10.3389/fimmu.2021.653836 (PMC8059369; doi:10.3389/fimmu.2021.653836)
Supplement: Supplementary Table 2 — The sample information of overall survival (OS), disease-specific survival (DSS), disease-free interval (DFI), and progression-free interval (PFI). [file Table_2.xlsx]

## Sheet: Sheet1
ID		DSS	DSS.time	DFI	DFI.time	PFI	PFI.time	StromalScore	ImmuneScore	ESTIMATEScore	TumorPurity
TCGA-GJ-A3OU-01A-31R-A38B-07	TCGA-GJ-A3OU-01	0	879	NA	NA	1	879	907.54	2645.77	3553.31	0.429757
TCGA-G3-A7M9-01A-23R-A352-07	TCGA-G3-A7M9-01	NA	56	0	56	0	56	-1407.2	-375.777	-1782.98	0.94166
TCGA-ED-A627-01A-12R-A311-07	TCGA-ED-A627-01	0	423	0	423	0	423	722.498	1937.92	2660.42	0.544079
TCGA-DD-AACB-01A-11R-A41C-07	TCGA-DD-AACB-01	0	2324	0	2324	0	2324	-738.201	1433.5	695.299	0.760282
TCGA-CC-5264-01A-01R-A131-07	TCGA-CC-5264-01	0	102	NA	NA	0	102	-1046.94	62.5018	-984.433	0.895838
TCGA-DD-AAW3-01A-11R-A41C-07	TCGA-DD-AAW3-01	0	1633	0	1633	0	1633	-969.019	-338.064	-1307.08	0.915872
TCGA-DD-AA3A-01A-11R-A37K-07	TCGA-DD-AA3A-01	0	410	0	410	0	410	-1530.18	-65.196	-1595.37	0.932036
TCGA-DD-AAEI-01A-11R-A41C-07	TCGA-DD-AAEI-01	0	1531	1	491	1	491	-693.16	738.771	45.6115	0.818683
TCGA-DD-AADF-01A-11R-A41C-07	TCGA-DD-AADF-01	0	115	0	115	0	115	-1213.02	283.706	-929.31	0.892213
TCGA-UB-A7MA-01A-11R-A33R-07	TCGA-UB-A7MA-01	0	848	NA	NA	1	221	-868.261	-52.3357	-920.597	0.891634
TCGA-EP-A3JL-01A-11R-A213-07	TCGA-EP-A3JL-01	0	303	NA	NA	0	303	-40.0571	1357.69	1317.63	0.697853
TCGA-DD-AACZ-01A-11R-A41C-07	TCGA-DD-AACZ-01	0	171	1	88	1	88	-500.886	2079.5	1578.61	0.66991
TCGA-2Y-A9HA-01A-11R-A39D-07	TCGA-2Y-A9HA-01	1	36	NA	NA	1	36	-1062.88	-67.23	-1130.11	0.905135
TCGA-ED-A82E-01A-11R-A352-07	TCGA-ED-A82E-01	0	408	0	408	0	408	-420.357	240.733	-179.624	0.837218
TCGA-ED-A66Y-01A-11R-A311-07	TCGA-ED-A66Y-01	0	296	0	296	0	296	-1274.17	-870.173	-2144.34	0.95818
TCGA-DD-AACF-01A-11R-A41C-07	TCGA-DD-AACF-01	1	365	1	119	1	119	-1051.56	691.312	-360.247	0.851421
TCGA-MI-A75G-01A-11R-A32O-07	TCGA-MI-A75G-01	0	698	0	698	0	698	-1144.34	-312.571	-1456.91	0.924479
TCGA-DD-AAEG-01A-11R-A39D-07	TCGA-DD-AAEG-01	0	719	0	719	0	719	-1046.88	-257.324	-1304.2	0.915702
TCGA-DD-AAD2-01A-11R-A41C-07	TCGA-DD-AAD2-01	0	658	0	658	0	658	255.901	1009.59	1265.49	0.703315
TCGA-UB-A7MB-01A-11R-A33R-07	TCGA-UB-A7MB-01	0	601	1	48	1	48	-1302.51	-495.302	-1797.81	0.942391
TCGA-DD-AACQ-01A-11R-A41C-07	TCGA-DD-AACQ-01	1	432	1	105	1	105	-1535.37	-575.324	-2110.69	0.956755
TCGA-2Y-A9GW-01A-11R-A38B-07	TCGA-2Y-A9GW-01	1	1271	1	1229	1	1229	0.373676	1490.52	1490.9	0.679413
TCGA-G3-A3CG-01A-11R-A213-07	TCGA-G3-A3CG-01	0	673	NA	NA	1	329	-464.594	437.335	-27.2592	0.824779
TCGA-DD-AAEH-01A-11R-A41C-07	TCGA-DD-AAEH-01	0	784	1	644	1	644	-234.011	1490.23	1256.21	0.704282
TCGA-G3-A5SI-01A-31R-A27V-07	TCGA-G3-A5SI-01	1	768	1	348	1	348	-1098.79	-523.281	-1622.07	0.933449
TCGA-KR-A7K2-01A-12R-A33R-07	TCGA-KR-A7K2-01	0	829	0	829	0	829	-430.133	583.191	153.058	0.809525
TCGA-RC-A6M3-01A-11R-A32O-07	TCGA-RC-A6M3-01	0	0	0	0	0	0	-1455.43	234.518	-1220.92	0.910721
TCGA-EP-A3RK-01A-11R-A22L-07	TCGA-EP-A3RK-01	0	363	NA	NA	1	320	-146.059	1781.09	1635.03	0.663738
TCGA-UB-A7MC-01A-11R-A33R-07	TCGA-UB-A7MC-01	0	500	1	359	1	359	-1385.7	-506.966	-1892.66	0.946957
TCGA-MI-A75H-01A-11R-A32O-07	TCGA-MI-A75H-01	0	747	1	301	1	301	-576.347	1051.68	475.329	0.780857
TCGA-DD-AADY-01A-11R-A41C-07	TCGA-DD-AADY-01	0	555	0	555	0	555	-707	-426.439	-1133.44	0.905342
TCGA-BC-A10W-01A-11R-A131-07	TCGA-BC-A10W-01	1	91	NA	NA	1	91	-668.048	475.215	-192.834	0.838277
TCGA-DD-AADN-01A-11R-A41C-07	TCGA-DD-AADN-01	0	898	0	898	0	898	-1169.21	2017.54	848.325	0.7455
TCGA-DD-AAVX-01A-11R-A41C-07	TCGA-DD-AAVX-01	0	1718	1	393	1	393	-529.832	964.954	435.122	0.78453
TCGA-QA-A7B7-01A-11R-A32O-07	TCGA-QA-A7B7-01	0	94	NA	NA	1	88	-1373.3	-70.1592	-1443.46	0.923724
TCGA-G3-A25Z-01A-11R-A16W-07	TCGA-G3-A25Z-01	0	655	0	655	0	655	-509.499	427.947	-81.5521	0.829259
TCGA-DD-A39V-01A-11R-A213-07	TCGA-DD-A39V-01	1	643	1	455	1	455	-445.989	1388.62	942.633	0.736202
TCGA-5C-A9VH-01A-11R-A37K-07	TCGA-5C-A9VH-01	0	322	0	322	0	322	-321.223	43.1866	-278.036	0.84503
TCGA-ZP-A9D4-01A-11R-A37K-07	TCGA-ZP-A9D4-01	0	395	0	395	0	395	-1015.84	-241.483	-1257.33	0.912915
TCGA-G3-AAV6-01A-21R-A37K-07	TCGA-G3-AAV6-01	1	65	1	44	1	44	-1136.52	-349.989	-1486.5	0.926126
TCGA-DD-A4NG-01A-11R-A27V-07	TCGA-DD-A4NG-01	1	802	1	430	1	430	-888.455	461.926	-426.529	0.856484
TCGA-BC-A10X-01A-11R-A131-07	TCGA-BC-A10X-01	0	770	0	770	0	770	330.615	859.368	1189.98	0.711151
TCGA-DD-A1EF-01A-11R-A131-07	TCGA-DD-A1EF-01	1	394	NA	NA	1	394	-682.192	603.686	-78.5055	0.829009
TCGA-G3-A5SL-01A-11R-A27V-07	TCGA-G3-A5SL-01	0	621	0	621	0	621	-717.057	-74.173	-791.23	0.882876
TCGA-EP-A12J-01A-11R-A131-07	TCGA-EP-A12J-01	0	570	0	570	0	570	-908.701	21.9141	-886.787	0.889376
TCGA-T1-A6J8-01A-11R-A32O-07	TCGA-T1-A6J8-01	0	23	NA	NA	0	23	-556.833	179.683	-377.149	0.85272
TCGA-G3-AAV0-01A-11R-A37K-07	TCGA-G3-AAV0-01	0	476	0	476	0	476	-861.232	218.41	-642.822	0.872438
TCGA-CC-A9FV-01A-11R-A37K-07	TCGA-CC-A9FV-01	0	0	0	0	0	0	1042.89	2269.13	3312.02	0.461463
TCGA-XR-A8TG-01A-11R-A36F-07	TCGA-XR-A8TG-01	0	898	1	350	1	350	-528.65	271.888	-256.762	0.843356
TCGA-ED-A8O5-01A-11R-A36F-07	TCGA-ED-A8O5-01	0	406	0	406	0	406	-759.107	-213.478	-972.585	0.895063
TCGA-DD-AACO-01A-11R-A41C-07	TCGA-DD-AACO-01	0	1876	1	479	1	479	-542.343	916.964	374.62	0.790006
TCGA-DD-A3A3-01A-11R-A22L-07	TCGA-DD-A3A3-01	NA	535	0	535	0	535	-1415.87	272.634	-1143.23	0.905952
TCGA-2Y-A9H6-01A-11R-A39D-07	TCGA-2Y-A9H6-01	0	357	0	357	0	357	-47.5923	1070.62	1023.03	0.728164
TCGA-LG-A9QD-01A-11R-A38B-07	TCGA-LG-A9QD-01	0	366	0	366	0	366	-825.823	487.403	-338.421	0.849737
TCGA-FV-A496-01A-11R-A266-07	TCGA-FV-A496-01	0	10	0	10	0	10	-1361.86	-601.55	-1963.41	0.950243
TCGA-DD-AAE0-01A-11R-A41C-07	TCGA-DD-AAE0-01	0	555	0	555	0	555	-704.62	34.2492	-670.371	0.874407
TCGA-DD-AACI-01A-11R-A41C-07	TCGA-DD-AACI-01	0	1618	1	1432	1	1432	-210.613	1875.8	1665.18	0.660421
TCGA-DD-AAD0-01A-11R-A41C-07	TCGA-DD-AAD0-01	0	137	1	47	1	47	-1483.26	-266.776	-1750.04	0.940022
TCGA-WQ-AB4B-01A-11R-A41C-07	TCGA-WQ-AB4B-01	0	395	1	273	1	273	-310.83	616.511	305.681	0.79617
TCGA-DD-AACW-01A-11R-A41C-07	TCGA-DD-AACW-01	0	1424	0	1424	0	1424	-1157.06	152.497	-1004.56	0.897147
TCGA-BD-A2L6-01A-11R-A213-07	TCGA-BD-A2L6-01	0	1363	1	415	1	415	-729.164	397.407	-331.757	0.84922
TCGA-DD-A3A6-01A-11R-A22L-07	TCGA-DD-A3A6-01	0	3258	0	3258	0	3258	635.761	1292.63	1928.39	0.630925
TCGA-DD-AAW1-01A-11R-A41C-07	TCGA-DD-AAW1-01	0	1989	0	1989	0	1989	-984.081	-163.034	-1147.12	0.906193
TCGA-FV-A3I0-01A-11R-A22L-07	TCGA-FV-A3I0-01	0	848	1	159	1	159	-495.208	337.778	-157.431	0.835432
TCGA-DD-A39X-01A-11R-A213-07	TCGA-DD-A39X-01	1	1694	1	1032	1	1032	-486.46	546.631	60.1712	0.817454
TCGA-3K-AAZ8-01A-12R-A39D-07	TCGA-3K-AAZ8-01	0	396	NA	NA	1	151	-1083.62	421.92	-661.702	0.873789
TCGA-K7-A5RF-01A-11R-A28V-07	TCGA-K7-A5RF-01	0	631	1	205	1	205	270.262	1353.12	1623.39	0.665016
TCGA-DD-A115-01A-11R-A131-07	TCGA-DD-A115-01	1	2542	1	469	1	469	-374.76	442.374	67.6132	0.816824
TCGA-ED-A7PY-01A-11R-A33R-07	TCGA-ED-A7PY-01	0	390	0	390	0	390	-1377.19	-271.184	-1648.38	0.934827
TCGA-ED-A66X-01A-11R-A311-07	TCGA-ED-A66X-01	0	406	1	124	1	124	311	923.775	1234.77	0.706513
TCGA-ZP-A9CY-01A-11R-A38B-07	TCGA-ZP-A9CY-01	0	782	0	782	0	782	-126.423	620.683	494.26	0.779118
TCGA-DD-AACG-01A-11R-A41C-07	TCGA-DD-AACG-01	1	469	1	125	1	125	-1260.11	764.891	-495.222	0.861645
TCGA-DD-A73B-01A-12R-A32O-07	TCGA-DD-A73B-01	1	283	1	240	1	240	-1209.1	-386.648	-1595.75	0.932056
TCGA-RC-A7S9-01A-11R-A33R-07	TCGA-RC-A7S9-01	0	640	0	640	0	640	-1240.62	525.255	-715.37	0.877593
TCGA-BC-A10S-01A-22R-A131-07	TCGA-BC-A10S-01	1	1423	1	1130	1	1130	-4.02593	1160.81	1156.78	0.714568
TCGA-DD-A4NB-01A-12R-A266-07	TCGA-DD-A4NB-01	0	989	1	912	1	912	1003.19	881.006	1884.19	0.635944
TCGA-CC-A5UC-01A-11R-A28V-07	TCGA-CC-A5UC-01	1	347	0	347	1	312	-304.271	386.723	82.4518	0.815566
TCGA-EP-A26S-01A-11R-A16W-07	TCGA-EP-A26S-01	0	608	NA	NA	0	608	-952.665	-326.428	-1279.09	0.914214
TCGA-K7-A6G5-01A-11R-A311-07	TCGA-K7-A6G5-01	0	512	NA	NA	0	512	-403.983	845.26	441.277	0.78397
TCGA-2Y-A9H1-01A-11R-A38B-07	TCGA-2Y-A9H1-01	1	1229	1	321	1	321	-914.584	1125.72	211.131	0.804491
TCGA-G3-A25S-01A-11R-A16W-07	TCGA-G3-A25S-01	1	416	NA	NA	1	37	-1084.4	640.699	-443.699	0.857782
TCGA-DD-AAE3-01A-11R-A41C-07	TCGA-DD-AAE3-01	0	566	0	566	0	566	-235.266	397.927	162.661	0.808696
TCGA-2Y-A9H3-01A-11R-A38B-07	TCGA-2Y-A9H3-01	0	1516	1	22	1	22	-202.953	1792.41	1589.45	0.668727
TCGA-CC-5261-01A-01R-A131-07	TCGA-CC-5261-01	0	97	NA	NA	0	97	50.5347	1123.3	1173.84	0.712815
TCGA-BC-A217-01A-11R-A155-07	TCGA-BC-A217-01	0	1397	0	1397	0	1397	-1180.36	685.461	-494.899	0.861621
TCGA-MI-A75C-01A-11R-A32O-07	TCGA-MI-A75C-01	0	291	0	291	0	291	-1497.72	611.681	-886.042	0.889326
TCGA-DD-AAVY-01A-11R-A41C-07	TCGA-DD-AAVY-01	0	1970	0	1970	0	1970	-1225.6	-315.669	-1541.27	0.929129
TCGA-DD-AADG-01A-11R-A41C-07	TCGA-DD-AADG-01	0	1145	1	270	1	270	-1101.26	-435.733	-1536.99	0.928896
TCGA-2Y-A9H7-01A-11R-A39D-07	TCGA-2Y-A9H7-01	0	1168	1	1117	1	1117	-1227.82	309.81	-918.013	0.891462
TCGA-BW-A5NO-01A-11R-A27V-07	TCGA-BW-A5NO-01	0	20	NA	NA	0	20	-743.863	508.361	-235.501	0.841675
TCGA-MR-A520-01A-11R-A266-07	TCGA-MR-A520-01	0	229	NA	NA	0	229	-795.098	185.987	-609.11	0.870008
TCGA-FV-A3R2-01A-11R-A22L-07	TCGA-FV-A3R2-01	0	194	0	194	0	194	-1135.54	115.853	-1019.68	0.898125
TCGA-DD-A1EG-01A-11R-A213-07	TCGA-DD-A1EG-01	1	1372	1	875	1	875	-55.0819	1390.73	1335.65	0.695956
TCGA-CC-A7IF-01A-11R-A33J-07	TCGA-CC-A7IF-01	1	649	0	649	1	254	-1151.94	-374.849	-1526.79	0.928341
TCGA-DD-AADC-01A-11R-A41C-07	TCGA-DD-AADC-01	1	425	1	101	1	101	-1145.44	-136.75	-1282.19	0.914399
TCGA-EP-A2KA-01A-11R-A180-07	TCGA-EP-A2KA-01	1	627	1	293	1	293	-830.793	1458.26	627.465	0.766712
TCGA-DD-A39Z-01A-11R-A213-07	TCGA-DD-A39Z-01	0	601	0	601	0	601	-1428.31	-229.049	-1657.36	0.935294
TCGA-DD-AAE7-01A-11R-A41C-07	TCGA-DD-AAE7-01	0	644	0	644	0	644	-263.936	871.955	608.019	0.768542
TCGA-YA-A8S7-01A-11R-A37K-07	TCGA-YA-A8S7-01	1	412	1	398	1	398	98.8046	1810.67	1909.48	0.633076
TCGA-CC-5260-01A-01R-A131-07	TCGA-CC-5260-01	0	87	NA	NA	0	87	37.9601	679.291	717.251	0.758185
TCGA-BC-A3KF-01A-11R-A213-07	TCGA-BC-A3KF-01	0	8	0	8	0	8	-878.812	-110.937	-989.749	0.896184
TCGA-DD-AADI-01A-11R-A41C-07	TCGA-DD-AADI-01	0	1085	0	1085	0	1085	-229.428	1585.04	1355.61	0.693849
TCGA-DD-A3A5-01A-11R-A22L-07	TCGA-DD-A3A5-01	1	3125	1	84	1	84	-705.848	115.266	-590.583	0.868664
TCGA-FV-A3I1-01A-11R-A22L-07	TCGA-FV-A3I1-01	0	247	0	247	0	247	-380.118	882.698	502.579	0.778352
TCGA-G3-A25U-01A-11R-A16W-07	TCGA-G3-A25U-01	0	1636	0	1636	0	1636	-1141.28	-245.176	-1386.46	0.920487
TCGA-DD-AADB-01A-11R-A41C-07	TCGA-DD-AADB-01	0	1242	0	1242	0	1242	-930.461	1228.37	297.912	0.796859
TCGA-G3-AAV1-01A-11R-A38B-07	TCGA-G3-AAV1-01	1	359	1	49	1	49	-808.537	-59.9313	-868.468	0.888144
TCGA-G3-AAUZ-01A-11R-A38B-07	TCGA-G3-AAUZ-01	0	480	0	480	0	480	-430.058	1030.32	600.258	0.76927
TCGA-G3-AAV4-01A-11R-A38B-07	TCGA-G3-AAV4-01	0	27	0	27	0	27	-977.499	-120.144	-1097.64	0.903098
TCGA-FV-A3R3-01A-11R-A22L-07	TCGA-FV-A3R3-01	0	366	0	366	0	366	417.305	808.465	1225.77	0.707448
TCGA-2Y-A9H4-01A-11R-A38B-07	TCGA-2Y-A9H4-01	0	1452	0	1452	0	1452	-837.523	567.57	-269.952	0.844395
TCGA-CC-A3M9-01A-11R-A213-07	TCGA-CC-A3M9-01	1	300	1	219	1	219	861.451	2873.21	3734.66	0.405572
TCGA-DD-A4NJ-01A-11R-A27V-07	TCGA-DD-A4NJ-01	0	928	1	549	1	549	-236.395	844.504	608.109	0.768533
TCGA-DD-AACH-01A-11R-A41C-07	TCGA-DD-AACH-01	0	195	1	83	1	83	-804.426	335.945	-468.481	0.859646
TCGA-CC-A8HT-01A-11R-A36F-07	TCGA-CC-A8HT-01	1	140	1	83	1	83	-1111.89	808.163	-303.723	0.84704
TCGA-DD-AAEB-01A-11R-A41C-07	TCGA-DD-AAEB-01	0	478	0	478	0	478	-831.229	372.481	-458.748	0.858915
TCGA-DD-A4NE-01A-11R-A27V-07	TCGA-DD-A4NE-01	1	660	1	190	1	190	-768.446	-257.231	-1025.68	0.898512
TCGA-DD-A114-01A-11R-A131-07	TCGA-DD-A114-01	0	1149	0	1149	0	1149	256.525	1824.54	2081.06	0.61338
TCGA-5C-AAPD-01A-21R-A39D-07	TCGA-5C-AAPD-01	0	20	0	20	0	20	-307.449	1730.86	1423.41	0.686649
TCGA-DD-A1EA-01A-11R-A131-07	TCGA-DD-A1EA-01	0	2415	1	754	1	754	-957.168	711.366	-245.802	0.842491
TCGA-XR-A8TD-01A-12R-A39D-07	TCGA-XR-A8TD-01	0	1030	0	1030	0	1030	372.805	1923.31	2296.12	0.588147
TCGA-ZS-A9CG-01A-11R-A37K-07	TCGA-ZS-A9CG-01	0	341	0	341	0	341	-784.666	78.3451	-706.32	0.876955
TCGA-2Y-A9H2-01A-12R-A38B-07	TCGA-2Y-A9H2-01	0	1731	0	1731	0	1731	-1042.26	570.281	-471.977	0.859908
TCGA-FV-A2QQ-01A-11R-A22L-07	TCGA-FV-A2QQ-01	0	729	0	729	0	729	-497.124	859.158	362.034	0.791138
TCGA-CC-A3MC-01A-11R-A22L-07	TCGA-CC-A3MC-01	0	363	1	297	1	297	-590.679	314.927	-275.752	0.844851
TCGA-DD-AAE1-01A-11R-A41C-07	TCGA-DD-AAE1-01	0	552	0	552	0	552	-1188.08	326.557	-861.52	0.887675
TCGA-DD-A4NN-01A-11R-A28V-07	TCGA-DD-A4NN-01	1	899	1	166	1	166	-887.508	-439.676	-1327.18	0.917052
TCGA-DD-AACK-01A-11R-A41C-07	TCGA-DD-AACK-01	0	9	0	9	0	9	-1102.54	125.111	-977.425	0.89538
TCGA-G3-A5SK-01A-11R-A27V-07	TCGA-G3-A5SK-01	0	744	1	483	1	483	-349.297	998.883	649.587	0.764624
TCGA-DD-A4NP-01A-11R-A28V-07	TCGA-DD-A4NP-01	0	3308	1	1286	1	1286	-771.549	180.3	-591.249	0.868713
TCGA-DD-AADL-01A-11R-A41C-07	TCGA-DD-AADL-01	0	636	0	636	0	636	-1275.62	-356.877	-1632.5	0.933997
TCGA-4R-AA8I-01A-11R-A38B-07	TCGA-4R-AA8I-01	1	262	1	158	1	158	-789.135	163.254	-625.881	0.87122
TCGA-KR-A7K8-01A-11R-A33J-07	TCGA-KR-A7K8-01	0	906	0	906	0	906	-226.859	1629.49	1402.63	0.688863
TCGA-DD-A73A-01A-12R-A32O-07	TCGA-DD-A73A-01	0	728	0	728	0	728	-949.252	860.482	-88.7703	0.82985
TCGA-BC-A8YO-01A-11R-A37K-07	TCGA-BC-A8YO-01	0	562	1	220	1	220	-956.009	1212.84	256.828	0.800488
TCGA-2Y-A9GY-01A-11R-A38B-07	TCGA-2Y-A9GY-01	1	757	1	637	1	637	-1007.68	1766.26	758.58	0.754215
TCGA-DD-AAVR-01A-11R-A41C-07	TCGA-DD-AAVR-01	0	2513	0	2513	0	2513	360.266	1716.87	2077.14	0.613835
TCGA-DD-AAE6-01A-11R-A41C-07	TCGA-DD-AAE6-01	0	141	1	105	1	105	-1665.88	-908.901	-2574.78	0.974337
TCGA-G3-A25T-01A-11R-A16W-07	TCGA-G3-A25T-01	0	1553	1	452	1	452	-501.062	327.923	-173.139	0.836697
TCGA-BD-A3EP-01A-11R-A22L-07	TCGA-BD-A3EP-01	0	409	0	409	0	409	140.133	1481.38	1621.51	0.665221
TCGA-FV-A23B-01A-11R-A16W-07	TCGA-FV-A23B-01	1	1852	1	1453	1	1453	-706.636	479.006	-227.63	0.841051
TCGA-DD-AACT-01A-11R-A41C-07	TCGA-DD-AACT-01	0	1562	0	1562	0	1562	-397.373	952.156	554.783	0.773518
TCGA-CC-A7IL-01A-11R-A33R-07	TCGA-CC-A7IL-01	1	278	1	179	1	179	-1607.08	-492.656	-2099.73	0.956286
TCGA-G3-AAV7-01A-11R-A38B-07	TCGA-G3-AAV7-01	0	361	0	361	0	361	-713.666	817.475	103.81	0.813748
TCGA-DD-A11D-01A-11R-A131-07	TCGA-DD-A11D-01	1	1560	1	498	1	498	-695.096	20.6693	-674.427	0.874695
TCGA-CC-A9FU-01A-11R-A37K-07	TCGA-CC-A9FU-01	0	0	0	0	0	0	-1636.45	-107.131	-1743.58	0.939698
TCGA-2Y-A9HB-01A-11R-A39D-07	TCGA-2Y-A9HB-01	0	260	0	260	0	260	-282.09	948.354	666.264	0.763044
TCGA-DD-AAC9-01A-11R-A41C-07	TCGA-DD-AAC9-01	0	347	0	347	0	347	127.515	1125.5	1253.01	0.704616
TCGA-DD-AAVU-01A-11R-A41C-07	TCGA-DD-AAVU-01	0	2202	1	1630	1	1630	-1241.14	-3.45844	-1244.6	0.912151
TCGA-DD-AAEK-01A-11R-A41C-07	TCGA-DD-AAEK-01	0	1067	0	1067	0	1067	-213.694	1535.26	1321.57	0.697439
TCGA-CC-5258-01A-01R-A131-07	TCGA-CC-5258-01	0	129	NA	NA	0	129	-599.192	613.18	13.9885	0.82134
TCGA-FV-A495-01A-11R-A266-07	TCGA-FV-A495-01	0	1	0	1	0	1	21.6713	1323.65	1345.32	0.694937
TCGA-UB-A7MF-01A-11R-A33J-07	TCGA-UB-A7MF-01	1	214	1	133	1	133	-660.988	1826.8	1165.82	0.71364
TCGA-CC-A7IK-01A-12R-A33R-07	TCGA-CC-A7IK-01	1	262	1	150	1	150	-1358.02	-595.097	-1953.12	0.949771
TCGA-DD-AAED-01A-12R-A41C-07	TCGA-DD-AAED-01	0	763	1	198	1	198	-1586.31	156.068	-1430.24	0.922979
TCGA-CC-5262-01A-01R-A131-07	TCGA-CC-5262-01	0	103	NA	NA	0	103	200.284	1177.62	1377.91	0.691489
TCGA-LG-A6GG-01A-11R-A311-07	TCGA-LG-A6GG-01	0	387	0	387	0	387	-1138.03	-105.212	-1243.25	0.912069
TCGA-G3-A7M6-01A-11R-A33R-07	TCGA-G3-A7M6-01	0	632	1	293	1	293	-686.813	250.601	-436.212	0.857217
TCGA-2Y-A9GV-01A-11R-A38B-07	TCGA-2Y-A9GV-01	1	2532	0	2532	1	1745	-163.43	890.929	727.5	0.757203
TCGA-DD-AACJ-01A-11R-A41C-07	TCGA-DD-AACJ-01	0	2102	1	100	1	100	-1311.49	-47.0489	-1358.54	0.918878
TCGA-DD-A3A2-01A-11R-A213-07	TCGA-DD-A3A2-01	0	2131	0	2131	0	2131	-614.734	151.221	-463.513	0.859273
TCGA-ED-A97K-01A-21R-A38B-07	TCGA-ED-A97K-01	0	6	0	6	0	6	-386.42	518.455	132.035	0.811332
TCGA-CC-A5UD-01A-11R-A28V-07	TCGA-CC-A5UD-01	1	304	1	182	1	182	-1212.35	-241.575	-1453.92	0.924312
TCGA-DD-AAE9-01A-11R-A41C-07	TCGA-DD-AAE9-01	0	722	0	722	0	722	-1435.44	-3.38484	-1438.83	0.923464
TCGA-DD-AAC8-01A-11R-A41C-07	TCGA-DD-AAC8-01	0	16	0	16	0	16	-970.83	401.052	-569.778	0.867147
TCGA-WJ-A86L-01A-12R-A39D-07	TCGA-WJ-A86L-01	0	345	0	345	0	345	-1420.72	-171.038	-1591.76	0.931844
TCGA-DD-A4NF-01A-11R-A27V-07	TCGA-DD-A4NF-01	0	942	1	656	1	656	-900.313	-447.58	-1347.89	0.91826
TCGA-DD-A1EB-01A-11R-A131-07	TCGA-DD-A1EB-01	0	2017	1	505	1	505	-626.92	89.9632	-536.957	0.864738
TCGA-GJ-A9DB-01A-11R-A37K-07	TCGA-GJ-A9DB-01	NA	67	0	67	0	67	-251.217	342.838	91.6213	0.814786
TCGA-2Y-A9H9-01A-21R-A39D-07	TCGA-2Y-A9H9-01	0	697	1	59	1	59	-726.527	313.764	-412.763	0.855439
TCGA-DD-AAD5-01A-11R-A41C-07	TCGA-DD-AAD5-01	0	1345	1	130	1	130	-1012.93	825.415	-187.517	0.837851
TCGA-5R-AAAM-01A-12R-A41C-07	TCGA-5R-AAAM-01	0	46	0	46	0	46	500.279	1105.16	1605.44	0.666981
TCGA-ED-A4XI-01A-11R-A266-07	TCGA-ED-A4XI-01	0	819	0	819	0	819	169.094	1149.98	1319.07	0.697702
TCGA-BC-A10Y-01A-11R-A131-07	TCGA-BC-A10Y-01	1	711	1	400	1	400	-885.92	431.423	-454.497	0.858596
TCGA-DD-A73E-01A-12R-A32O-07	TCGA-DD-A73E-01	0	44	0	44	0	44	-1221.86	-806.232	-2028.09	0.953158
TCGA-DD-AADK-01A-11R-A41C-07	TCGA-DD-AADK-01	0	1049	0	1049	0	1049	-240.923	788.765	547.842	0.774163
TCGA-EP-A2KB-01A-11R-A180-07	TCGA-EP-A2KB-01	1	596	1	161	1	161	-1175.19	-43.9062	-1219.1	0.91061
TCGA-XR-A8TF-01A-11R-A36F-07	TCGA-XR-A8TF-01	0	693	1	231	1	231	-1153.52	-131.962	-1285.48	0.914594
TCGA-DD-AADM-01A-11R-A41C-07	TCGA-DD-AADM-01	0	12	0	12	0	12	-627.932	511.372	-116.56	0.83212
TCGA-GJ-A6C0-01A-12R-A311-07	TCGA-GJ-A6C0-01	NA	31	NA	NA	0	31	-594.722	1103.19	508.471	0.777809
TCGA-DD-A1EJ-01A-11R-A155-07	TCGA-DD-A1EJ-01	1	1005	1	263	1	263	-1089.98	281.09	-808.891	0.884091
TCGA-2V-A95S-01A-11R-A37K-07	TCGA-2V-A95S-01	0	NA	0	NA	0	NA	-464.135	2187.99	1723.85	0.65393
TCGA-K7-AAU7-01A-11R-A38B-07	TCGA-K7-AAU7-01	0	359	NA	NA	1	58	-301.385	650.866	349.481	0.792263
TCGA-DD-AAW0-01A-11R-A41C-07	TCGA-DD-AAW0-01	0	2015	0	2015	0	2015	-39.2679	1089.3	1050.03	0.725442
TCGA-XR-A8TE-01A-11R-A36F-07	TCGA-XR-A8TE-01	0	925	1	210	1	210	-572.728	-11.0594	-583.788	0.86817
TCGA-G3-A6UC-01A-21R-A33J-07	TCGA-G3-A6UC-01	0	671	1	639	1	639	-1222.01	-299.09	-1521.1	0.92803
TCGA-BC-A112-01A-11R-A131-07	TCGA-BC-A112-01	0	153	0	153	0	153	-308.571	474.911	166.34	0.808378
TCGA-ED-A459-01A-11R-A266-07	TCGA-ED-A459-01	0	910	0	910	0	910	-909.769	540.468	-369.3	0.852118
TCGA-NI-A8LF-01A-11R-A36F-07	TCGA-NI-A8LF-01	0	799	0	799	0	799	-421.618	46.9992	-374.618	0.852526
TCGA-BC-A5W4-01A-11R-A28V-07	TCGA-BC-A5W4-01	0	547	NA	NA	1	384	-1510.01	-672.101	-2182.11	0.959752
TCGA-CC-A7IE-01A-21R-A38B-07	TCGA-CC-A7IE-01	1	217	0	217	1	169	-703.825	1249.83	546.006	0.774334
TCGA-5R-AA1D-01A-11R-A38B-07	TCGA-5R-AA1D-01	0	449	0	449	0	449	1184.88	1028.79	2213.67	0.597891
TCGA-CC-A7II-01A-11R-A33J-07	TCGA-CC-A7II-01	0	399	1	278	1	278	-811.961	-369.776	-1181.74	0.90833
TCGA-DD-A73C-01A-12R-A33J-07	TCGA-DD-A73C-01	0	701	1	566	1	566	-168.095	223.793	55.6972	0.817832
TCGA-KR-A7K7-01A-11R-A33J-07	TCGA-KR-A7K7-01	0	951	1	239	1	239	-1161.14	1202.42	41.2794	0.819048
TCGA-DD-AAVP-01A-11R-A41C-07	TCGA-DD-AAVP-01	0	2752	1	903	1	903	-675.646	78.8789	-596.767	0.869114
TCGA-DD-AAD1-01A-11R-A41C-07	TCGA-DD-AAD1-01	0	564	NA	NA	1	127	247.986	1364.46	1612.45	0.666214
TCGA-DD-AADS-01A-11R-A41C-07	TCGA-DD-AADS-01	0	474	0	474	0	474	-760.997	1426.36	665.365	0.763129
TCGA-DD-A3A1-01A-11R-A213-07	TCGA-DD-A3A1-01	0	233	0	233	0	233	-1086.59	901.014	-185.576	0.837695
TCGA-RC-A7SB-01A-21R-A352-07	TCGA-RC-A7SB-01	0	588	0	588	0	588	-1099.32	16.8618	-1082.46	0.902139
TCGA-DD-AAVZ-01A-11R-A41C-07	TCGA-DD-AAVZ-01	0	1900	0	1900	0	1900	-836.917	75.7187	-761.198	0.880798
TCGA-2Y-A9GT-01A-11R-A38B-07	TCGA-2Y-A9GT-01	1	1624	1	1083	1	1083	-204.609	1524.92	1320.31	0.697571
TCGA-DD-AADQ-01A-11R-A41C-07	TCGA-DD-AADQ-01	0	436	0	436	0	436	-1222.64	530.056	-692.582	0.875984
TCGA-DD-A119-01A-11R-A131-07	TCGA-DD-A119-01	NA	223	NA	NA	0	223	-406.79	328.099	-78.6911	0.829024
TCGA-DD-A4NO-01A-11R-A28V-07	TCGA-DD-A4NO-01	0	2245	1	990	1	990	-402.153	153.021	-249.133	0.842754
TCGA-BW-A5NP-01A-11R-A27V-07	TCGA-BW-A5NP-01	0	0	NA	NA	1	102	-1409.93	-567.351	-1977.28	0.950875
TCGA-DD-A4NA-01A-11R-A266-07	TCGA-DD-A4NA-01	0	1008	0	1008	0	1008	-442.749	565.533	122.784	0.812126
TCGA-MI-A75E-01A-11R-A32O-07	TCGA-MI-A75E-01	0	507	0	507	0	507	-183.359	931.638	748.279	0.755207
TCGA-BC-A10Q-01A-11R-A131-07	TCGA-BC-A10Q-01	1	1135	NA	NA	1	340	-730.442	193.068	-537.374	0.864769
TCGA-DD-AAEE-01A-11R-A41C-07	TCGA-DD-AAEE-01	0	810	1	224	1	224	-1024.23	-252.282	-1276.52	0.914061
TCGA-BC-A3KG-01A-11R-A213-07	TCGA-BC-A3KG-01	0	680	1	209	1	209	-1339.24	-126.963	-1466.2	0.924998
TCGA-DD-A3A7-01A-11R-A22L-07	TCGA-DD-A3A7-01	1	419	1	144	1	144	-1183.84	293.629	-890.208	0.889606
TCGA-CC-A8HV-01A-11R-A36F-07	TCGA-CC-A8HV-01	1	279	1	149	1	149	-1293.1	-449.356	-1742.46	0.939642
TCGA-DD-AACN-01A-11R-A41C-07	TCGA-DD-AACN-01	0	1302	1	357	1	357	-338.947	340.225	1.27818	0.822403
TCGA-G3-A25V-01A-11R-A16W-07	TCGA-G3-A25V-01	0	860	1	489	1	489	16.8276	1161.11	1177.94	0.712393
TCGA-DD-AAVS-01A-11R-A41C-07	TCGA-DD-AAVS-01	0	1823	0	1823	0	1823	-726.174	195.474	-530.7	0.864276
TCGA-CC-A3MB-01A-11R-A213-07	TCGA-CC-A3MB-01	1	315	0	315	1	260	-1014.46	11.0438	-1003.41	0.897072
TCGA-ZP-A9D0-01A-11R-A37K-07	TCGA-ZP-A9D0-01	0	1091	0	1091	0	1091	-774.63	-214.972	-989.603	0.896175
TCGA-DD-AAE2-01A-11R-A41C-07	TCGA-DD-AAE2-01	0	638	0	638	0	638	-264.031	926.297	662.266	0.763423
TCGA-RG-A7D4-01A-12R-A33R-07	TCGA-RG-A7D4-01	0	1098	0	1098	0	1098	-1154.33	1538.88	384.545	0.789112
TCGA-DD-A4NK-01A-11R-A28V-07	TCGA-DD-A4NK-01	1	1210	1	89	1	89	-765.805	-114.822	-880.627	0.888963
TCGA-DD-A39W-01A-11R-A213-07	TCGA-DD-A39W-01	NA	827	0	827	0	827	-1038.15	-72.1218	-1110.27	0.903893
TCGA-DD-AADJ-01A-11R-A41C-07	TCGA-DD-AADJ-01	0	1066	0	1066	0	1066	-1063.12	446.38	-616.74	0.87056
TCGA-DD-AACA-01A-11R-A41C-07	TCGA-DD-AACA-01	0	2301	1	776	1	776	-1088.65	-255.839	-1344.49	0.918062
TCGA-CC-5263-01A-01R-A131-07	TCGA-CC-5263-01	0	129	NA	NA	0	129	-847.686	627.147	-220.54	0.840487
TCGA-DD-A11C-01A-11R-A131-07	TCGA-DD-A11C-01	0	662	NA	NA	0	662	-136.658	452.435	315.777	0.795272
TCGA-DD-A4NL-01A-11R-A28V-07	TCGA-DD-A4NL-01	0	1711	0	1711	0	1711	-253.079	394.877	141.798	0.810494
TCGA-HP-A5N0-01A-11R-A28V-07	TCGA-HP-A5N0-01	1	1147	1	179	1	179	145.58	553.615	699.196	0.75991
TCGA-ZP-A9D1-01A-11R-A38B-07	TCGA-ZP-A9D1-01	0	21	0	21	0	21	-233.69	636.418	402.728	0.78747
TCGA-ES-A2HS-01A-11R-A180-07	TCGA-ES-A2HS-01	0	688	0	688	0	688	-545.085	-19.9664	-565.051	0.866802
TCGA-UB-AA0U-01A-11R-A38B-07	TCGA-UB-AA0U-01	0	327	NA	NA	1	106	8.37085	748.956	757.327	0.754336
TCGA-DD-AAD3-01A-11R-A41C-07	TCGA-DD-AAD3-01	0	1295	0	1295	0	1295	-7.399	702.88	695.481	0.760265
TCGA-BW-A5NQ-01A-11R-A27V-07	TCGA-BW-A5NQ-01	0	0	NA	NA	0	0	-859.886	1408.79	548.899	0.774065
TCGA-DD-A11B-01A-11R-A131-07	TCGA-DD-A11B-01	0	14	NA	NA	0	14	-922.613	-328.277	-1250.89	0.912529
TCGA-G3-A25Y-01A-11R-A16W-07	TCGA-G3-A25Y-01	1	452	1	355	1	355	-215.857	583.337	367.48	0.790648
TCGA-CC-A7IH-01A-11R-A33J-07	TCGA-CC-A7IH-01	0	365	0	365	0	365	-1022.56	-480.905	-1503.47	0.927063
TCGA-MR-A8JO-01A-12R-A36F-07	TCGA-MR-A8JO-01	0	330	NA	NA	0	330	758.38	1462.89	2221.27	0.596997
TCGA-2Y-A9GX-01A-11R-A38B-07	TCGA-2Y-A9GX-01	0	2442	NA	NA	1	2133	715.417	1717.96	2433.38	0.571733
TCGA-DD-AACS-01A-11R-A41C-07	TCGA-DD-AACS-01	0	1804	0	1804	0	1804	-1284.66	-381.287	-1665.94	0.93574
TCGA-K7-A5RG-01A-11R-A28V-07	TCGA-K7-A5RG-01	0	519	0	519	0	519	-257.947	2516.85	2258.9	0.592556
TCGA-DD-A1ED-01A-11R-A155-07	TCGA-DD-A1ED-01	0	2301	0	2301	0	2301	-136.844	1132.59	995.745	0.730904
TCGA-DD-AADV-01A-11R-A39D-07	TCGA-DD-AADV-01	0	574	0	574	0	574	-470.538	159.476	-311.062	0.847612
TCGA-DD-AAD8-01A-11R-A41C-07	TCGA-DD-AAD8-01	0	1219	0	1219	0	1219	-1027.51	110.257	-917.253	0.891412
TCGA-DD-A4NQ-01A-21R-A28V-07	TCGA-DD-A4NQ-01	1	373	1	126	1	126	-1010.63	618.874	-391.752	0.853838
TCGA-NI-A4U2-01A-11R-A28V-07	TCGA-NI-A4U2-01	1	1791	1	106	1	106	-515.025	172.087	-342.938	0.850086
TCGA-G3-AAV5-01A-11R-A37K-07	TCGA-G3-AAV5-01	0	354	1	117	1	117	-1150.5	67.2839	-1083.22	0.902187
TCGA-G3-AAV2-01A-11R-A37K-07	TCGA-G3-AAV2-01	0	372	0	372	0	372	-837.936	64.9713	-772.965	0.881614
TCGA-BC-A216-01A-11R-A155-07	TCGA-BC-A216-01	0	1351	0	1351	0	1351	-1035.1	864.061	-171.041	0.836528
TCGA-DD-AAEA-01A-11R-A41C-07	TCGA-DD-AAEA-01	0	575	0	575	0	575	-1070.59	700.332	-370.255	0.852191
TCGA-EP-A2KC-01A-11R-A213-07	TCGA-EP-A2KC-01	0	19	0	19	0	19	-851.809	118.032	-733.778	0.878885
TCGA-RC-A6M5-01A-11R-A32O-07	TCGA-RC-A6M5-01	0	15	NA	NA	0	15	328.112	200.148	528.259	0.77598
TCGA-2Y-A9GU-01A-11R-A38B-07	TCGA-2Y-A9GU-01	0	1939	0	1939	0	1939	-1058.96	-210.181	-1269.14	0.913622
TCGA-BC-A10T-01A-11R-A131-07	TCGA-BC-A10T-01	1	837	NA	NA	1	598	100.9	185.316	286.216	0.797896
TCGA-RC-A7SK-01A-11R-A352-07	TCGA-RC-A7SK-01	0	472	1	312	1	312	-1206.78	-385.532	-1592.31	0.931873
TCGA-BC-A69H-01A-11R-A311-07	TCGA-BC-A69H-01	0	444	0	444	0	444	-869.075	915.595	46.5202	0.818606
TCGA-DD-AAVW-01A-11R-A41C-07	TCGA-DD-AAVW-01	0	2317	0	2317	0	2317	210.925	812.512	1023.44	0.728124
TCGA-DD-AADO-01A-11R-A41C-07	TCGA-DD-AADO-01	0	453	0	453	0	453	-840.606	1459.19	618.583	0.767549
TCGA-ZS-A9CD-01A-11R-A37K-07	TCGA-ZS-A9CD-01	NA	1386	1	371	1	371	-296.953	652.528	355.574	0.791717
TCGA-DD-AACU-01A-11R-A41C-07	TCGA-DD-AACU-01	0	1567	0	1567	0	1567	-739.494	419.425	-320.068	0.848313
TCGA-G3-A7M5-01A-11R-A33R-07	TCGA-G3-A7M5-01	0	447	0	447	0	447	-1004.63	353.205	-651.424	0.873054
TCGA-WQ-A9G7-01A-11R-A37K-07	TCGA-WQ-A9G7-01	0	30	0	30	0	30	-1336	-296.835	-1632.83	0.934014
TCGA-G3-A5SJ-01A-11R-A27V-07	TCGA-G3-A5SJ-01	0	698	1	308	1	308	-642.024	1246.16	604.14	0.768906
TCGA-O8-A75V-01A-11R-A32O-07	TCGA-O8-A75V-01	0	538	NA	NA	0	538	-266.604	1182.33	915.725	0.73887
TCGA-ED-A5KG-01A-11R-A27V-07	TCGA-ED-A5KG-01	0	854	0	854	1	110	534.161	3210.43	3744.6	0.404238
TCGA-CC-A8HU-01A-11R-A36F-07	TCGA-CC-A8HU-01	1	344	1	301	1	301	-1239.86	-254.868	-1494.73	0.926581
TCGA-DD-AACV-01A-11R-A41C-07	TCGA-DD-AACV-01	0	1531	1	344	1	344	-1451.21	-753.183	-2204.39	0.960665
TCGA-CC-A8HS-01A-11R-A36F-07	TCGA-CC-A8HS-01	1	300	1	201	1	201	-1214.43	-428.692	-1643.12	0.934553
TCGA-CC-A123-01A-11R-A131-07	TCGA-CC-A123-01	0	219	NA	NA	1	145	-911.217	351.449	-559.768	0.866415
TCGA-DD-A3A9-01A-11R-A266-07	TCGA-DD-A3A9-01	1	931	NA	NA	1	289	-93.1589	861.606	768.447	0.753264
TCGA-DD-A4ND-01A-11R-A266-07	TCGA-DD-A4ND-01	0	2746	0	2746	1	15	606.159	1158.07	1764.23	0.649434
TCGA-ZP-A9CV-01A-11R-A38B-07	TCGA-ZP-A9CV-01	1	1088	NA	NA	1	1088	-197.697	942.835	745.138	0.75551
TCGA-ED-A7XO-01A-11R-A352-07	TCGA-ED-A7XO-01	0	427	1	262	1	262	-192.957	786.467	593.511	0.769903
TCGA-ZP-A9D2-01A-11R-A38B-07	TCGA-ZP-A9D2-01	1	765	1	315	1	315	-562.036	227.712	-334.325	0.849419
TCGA-2Y-A9GZ-01A-11R-A39D-07	TCGA-2Y-A9GZ-01	1	848	1	719	1	719	-1050.22	-420.713	-1470.93	0.925262
TCGA-DD-A11A-01A-11R-A131-07	TCGA-DD-A11A-01	0	79	0	79	0	79	-1112.99	-225.475	-1338.46	0.917711
TCGA-LG-A9QC-01A-11R-A37K-07	TCGA-LG-A9QC-01	0	425	0	425	0	425	-996.093	-415.401	-1411.49	0.921917
TCGA-DD-A4NV-01A-11R-A311-07	TCGA-DD-A4NV-01	0	2398	0	2398	0	2398	-259.465	231.164	-28.3011	0.824865
TCGA-CC-A7IG-01A-11R-A33J-07	TCGA-CC-A7IG-01	1	299	1	195	1	195	-995.92	455.826	-540.094	0.864969
TCGA-DD-AADR-01A-11R-A41C-07	TCGA-DD-AADR-01	0	2028	1	1700	1	1700	-871.713	545.697	-326.017	0.848775
TCGA-BC-A110-01A-11R-A131-07	TCGA-BC-A110-01	1	2116	1	2057	1	2057	628.231	1583.76	2211.99	0.598089
TCGA-DD-A118-01A-11R-A131-07	TCGA-DD-A118-01	0	3437	1	658	1	658	-397.932	24.4191	-373.513	0.852441
TCGA-UB-A7ME-01A-11R-A33J-07	TCGA-UB-A7ME-01	0	486	0	486	0	486	-458.324	1191.48	733.156	0.756661
TCGA-DD-A4NI-01A-11R-A27V-07	TCGA-DD-A4NI-01	0	816	0	816	0	816	-174.905	1026.32	851.419	0.745197
TCGA-G3-A3CI-01A-11R-A213-07	TCGA-G3-A3CI-01	0	180	0	180	0	180	-388.656	959.738	571.082	0.772
TCGA-DD-AACY-01A-11R-A41C-07	TCGA-DD-AACY-01	0	1450	1	776	1	776	-797.703	308.296	-489.407	0.861211
TCGA-2Y-A9H5-01A-11R-A38B-07	TCGA-2Y-A9H5-01	1	555	1	258	1	258	-342.667	257.081	-85.5862	0.82959
TCGA-ZS-A9CF-01A-11R-A38B-07	TCGA-ZS-A9CF-01	0	2412	1	636	1	636	-907.516	378.119	-529.397	0.86418
TCGA-RC-A6M6-01A-11R-A32O-07	TCGA-RC-A6M6-01	0	9	NA	NA	0	9	-1456.23	-35.3466	-1491.58	0.926407
TCGA-XR-A8TC-01A-11R-A36F-07	TCGA-XR-A8TC-01	0	1339	0	1339	0	1339	-852.986	-245.969	-1098.95	0.903181
TCGA-RC-A7SF-01A-11R-A352-07	TCGA-RC-A7SF-01	0	579	1	502	1	502	-1020.15	298.727	-721.423	0.878018
TCGA-CC-A7IJ-01A-11R-A33R-07	TCGA-CC-A7IJ-01	0	382	0	382	0	382	818.748	1950.73	2769.47	0.530578
TCGA-DD-A1EL-01A-11R-A155-07	TCGA-DD-A1EL-01	1	415	NA	NA	1	415	-1359.48	201.455	-1158.03	0.906869
TCGA-BC-A10Z-01A-11R-A131-07	TCGA-BC-A10Z-01	0	34	0	34	0	34	-1538.51	-767.421	-2305.93	0.964697
TCGA-G3-A5SM-01A-12R-A28V-07	TCGA-G3-A5SM-01	0	520	1	252	1	252	43.6836	987.145	1030.83	0.727379
TCGA-DD-AAVQ-01A-11R-A41C-07	TCGA-DD-AAVQ-01	0	2728	1	1509	1	1509	-344.132	2030.7	1686.57	0.658061
TCGA-CC-5259-01A-31R-A213-07	TCGA-CC-5259-01	0	250	1	180	1	180	-1365.9	574.587	-791.312	0.882882
TCGA-DD-AAE4-01A-11R-A41C-07	TCGA-DD-AAE4-01	0	608	1	111	1	111	-2.04641	1777.08	1775.03	0.648228
TCGA-DD-AACL-01A-11R-A41C-07	TCGA-DD-AACL-01	NA	107	0	107	0	107	-548.012	1789.2	1241.19	0.705846
TCGA-DD-AADW-01A-11R-A39D-07	TCGA-DD-AADW-01	0	587	1	386	1	386	-573.82	-393.678	-967.498	0.89473
TCGA-DD-A39Y-01A-11R-A213-07	TCGA-DD-A39Y-01	0	171	0	171	0	171	-1249.02	-4.87534	-1253.89	0.912709
TCGA-ED-A7PZ-01A-11R-A33R-07	TCGA-ED-A7PZ-01	0	6	0	6	0	6	-1543.62	-553.583	-2097.2	0.956177
TCGA-DD-AAD6-01A-11R-A41C-07	TCGA-DD-AAD6-01	0	672	1	50	1	50	-1499.83	39.1827	-1460.65	0.924688
TCGA-RC-A6M4-01A-11R-A32O-07	TCGA-RC-A6M4-01	0	22	NA	NA	0	22	-1319.35	-680.225	-1999.58	0.951883
TCGA-KR-A7K0-01A-12R-A33R-07	TCGA-KR-A7K0-01	0	65	0	65	0	65	-574.175	287.507	-286.668	0.845707
TCGA-DD-A73D-01A-12R-A32O-07	TCGA-DD-A73D-01	0	693	1	592	1	592	-1584.47	-689.94	-2274.41	0.963469
TCGA-DD-AADU-01A-11R-A41C-07	TCGA-DD-AADU-01	0	554	0	554	0	554	-1330.84	-21.7792	-1352.62	0.918535
TCGA-G3-A3CJ-01A-11R-A213-07	TCGA-G3-A3CJ-01	0	594	1	296	1	296	-862.894	230.06	-632.834	0.87172
TCGA-DD-A1EI-01A-11R-A131-07	TCGA-DD-A1EI-01	0	183	0	183	0	183	-28.2468	508.781	480.534	0.780379
TCGA-DD-A4NS-01A-11R-A311-07	TCGA-DD-A4NS-01	1	2456	1	893	1	893	576.259	1239.75	1816.01	0.643636
TCGA-ED-A7PX-01A-51R-A352-07	TCGA-ED-A7PX-01	0	6	0	6	0	6	9.77022	370.921	380.691	0.78946
TCGA-BD-A3ER-01A-11R-A213-07	TCGA-BD-A3ER-01	0	1115	1	226	1	226	59.262	599.575	658.837	0.763748
TCGA-2Y-A9H0-01A-11R-A38B-07	TCGA-2Y-A9H0-01	0	3675	0	3675	0	3675	-1129.92	796.38	-333.537	0.849358
TCGA-DD-AACP-01A-11R-A41C-07	TCGA-DD-AACP-01	0	415	0	415	0	415	-1683.34	-319.457	-2002.8	0.952028
TCGA-2Y-A9GS-01A-12R-A38B-07	TCGA-2Y-A9GS-01	1	724	1	102	1	102	-573.327	619.086	45.7587	0.818671
TCGA-5R-AA1C-01A-11R-A41C-07	TCGA-5R-AA1C-01	0	520	0	520	0	520	-863.554	331.589	-531.966	0.86437
TCGA-DD-AACE-01A-11R-A41C-07	TCGA-DD-AACE-01	0	2184	1	1279	1	1279	-770.353	-90.173	-860.526	0.887607
TCGA-WX-AA44-01A-11R-A39D-07	TCGA-WX-AA44-01	0	615	NA	NA	1	246	-973.423	366.419	-607.004	0.869856
TCGA-ED-A7XP-01A-11R-A352-07	TCGA-ED-A7XP-01	0	400	1	187	1	187	-388.861	490.049	101.188	0.813971
TCGA-DD-A1EC-01A-21R-A131-07	TCGA-DD-A1EC-01	0	602	1	299	1	299	-228.872	2452.51	2223.64	0.596718
TCGA-DD-AAVV-01A-11R-A41C-07	TCGA-DD-AAVV-01	0	2455	0	2455	0	2455	34.7348	1461.03	1495.76	0.678889
TCGA-2Y-A9H8-01A-11R-A39D-07	TCGA-2Y-A9H8-01	1	633	1	398	1	398	-975.412	917.843	-57.569	0.827286
TCGA-RC-A7SH-01A-11R-A38B-07	TCGA-RC-A7SH-01	0	468	1	91	1	91	-1304.3	-430.461	-1734.76	0.939254
TCGA-ZS-A9CE-01A-11R-A37K-07	TCGA-ZS-A9CE-01	0	1241	0	1241	1	892	-1253.94	-540.113	-1794.05	0.942206
TCGA-BC-A10U-01A-11R-A131-07	TCGA-BC-A10U-01	1	837	NA	NA	1	586	-1311.32	38.3043	-1273.02	0.913853
TCGA-ZP-A9CZ-01A-11R-A38B-07	TCGA-ZP-A9CZ-01	0	706	0	706	0	706	-284.793	1149.05	864.259	0.743939
TCGA-DD-AAW2-01A-11R-A41C-07	TCGA-DD-AAW2-01	0	1855	1	391	1	391	-862.798	-268.061	-1130.86	0.905181
TCGA-G3-A25X-01A-11R-A16W-07	TCGA-G3-A25X-01	0	1779	0	1779	0	1779	-131.135	1496.43	1365.29	0.692825
TCGA-DD-AADA-01A-11R-A41C-07	TCGA-DD-AADA-01	0	1233	0	1233	0	1233	-335.41	1043.55	708.142	0.759056
TCGA-DD-AACD-01A-11R-A41C-07	TCGA-DD-AACD-01	1	381	1	151	1	151	-439.492	1053.12	613.629	0.768015
TCGA-G3-AAV3-01A-11R-A37K-07	TCGA-G3-AAV3-01	0	412	0	412	0	412	-364.964	1376.59	1011.63	0.72931
TCGA-G3-A3CH-01A-11R-A22L-07	TCGA-G3-A3CH-01	0	780	1	116	1	116	-474.939	583.876	108.938	0.81331
TCGA-G3-A3CK-01A-11R-A213-07	TCGA-G3-A3CK-01	0	585	0	585	0	585	-751.53	706.088	-45.4429	0.826285
TCGA-5C-A9VG-01A-11R-A37K-07	TCGA-5C-A9VG-01	0	328	0	328	0	328	-454.059	-330.404	-784.463	0.88241
TCGA-G3-A7M8-01A-11R-A33R-07	TCGA-G3-A7M8-01	0	430	NA	NA	0	430	-329.421	280.809	-48.6125	0.826547
TCGA-DD-A4NR-01A-11R-A311-07	TCGA-DD-A4NR-01	0	9	0	9	0	9	125.97	2330.72	2456.69	0.568922
TCGA-FV-A4ZP-01A-12R-A266-07	TCGA-FV-A4ZP-01	0	2486	NA	NA	0	2486	-793.322	1223.48	430.162	0.784982
TCGA-UB-AA0V-01A-11R-A38B-07	TCGA-UB-AA0V-01	0	314	0	314	0	314	104.647	607.332	711.98	0.758689
TCGA-DD-A116-01A-11R-A131-07	TCGA-DD-A116-01	0	1622	1	828	1	828	-685.773	433.555	-252.217	0.842998
TCGA-DD-A1EH-01A-11R-A131-07	TCGA-DD-A1EH-01	0	1495	1	120	1	120	-522.853	-121.763	-644.616	0.872566
TCGA-CC-A9FS-01A-11R-A37K-07	TCGA-CC-A9FS-01	0	211	0	211	1	109	-1002.63	2.01921	-1000.61	0.89689
TCGA-DD-A1EK-01A-11R-A213-07	TCGA-DD-A1EK-01	1	558	NA	NA	1	167	-409.747	799	389.253	0.788688
TCGA-CC-A3MA-01A-11R-A213-07	TCGA-CC-A3MA-01	1	303	1	261	1	261	-509.908	-115.781	-625.688	0.871206
TCGA-DD-A4NH-01A-11R-A27V-07	TCGA-DD-A4NH-01	0	917	1	161	1	161	-666.359	921.822	255.463	0.800609
TCGA-PD-A5DF-01A-11R-A27V-07	TCGA-PD-A5DF-01	1	639	NA	NA	1	639	130.354	884.094	1014.45	0.729027
TCGA-UB-A7MD-01A-12R-A352-07	TCGA-UB-A7MD-01	0	52	0	52	0	52	-294.65	932.213	637.563	0.76576
TCGA-BC-A69I-01A-11R-A311-07	TCGA-BC-A69I-01	0	387	0	387	0	387	-310.186	463.845	153.658	0.809473
TCGA-FV-A2QR-01A-11R-A213-07	TCGA-FV-A2QR-01	1	581	NA	NA	1	561	-268.359	186.77	-81.5898	0.829262
TCGA-DD-AACC-01A-11R-A41C-07	TCGA-DD-AACC-01	1	1685	1	537	1	537	87.3614	2643.14	2730.5	0.535418
TCGA-WX-AA47-01A-11R-A39D-07	TCGA-WX-AA47-01	1	556	1	103	1	103	-1442.32	-442.977	-1885.3	0.946609
TCGA-MI-A75I-01A-11R-A32O-07	TCGA-MI-A75I-01	0	630	1	265	1	265	-1212.51	187.732	-1024.78	0.898454
TCGA-ED-A8O6-01A-11R-A36F-07	TCGA-ED-A8O6-01	0	56	0	56	0	56	-991.686	-11.4781	-1003.16	0.897056
TCGA-CC-A1HT-01A-11R-A131-07	TCGA-CC-A1HT-01	0	101	NA	NA	0	101	115.341	2125.9	2241.24	0.594643
TCGA-HP-A5MZ-01A-21R-A27V-07	TCGA-HP-A5MZ-01	0	91	0	91	0	91	593.878	1557.75	2151.63	0.605167
TCGA-DD-A113-01A-11R-A131-07	TCGA-DD-A113-01	0	2425	1	1676	1	1676	-776.531	488.343	-288.187	0.845826
TCGA-DD-A3A8-01A-11R-A22L-07	TCGA-DD-A3A8-01	0	11	0	11	0	11	-1162.38	-194.793	-1357.17	0.918799
TCGA-DD-AADP-01A-11R-A39D-07	TCGA-DD-AADP-01	0	458	0	458	0	458	-567.358	361.343	-206.014	0.83933
TCGA-DD-A73G-01A-22R-A32O-07	TCGA-DD-A73G-01	0	3478	0	3478	0	3478	-758.44	600.46	-157.98	0.835476
TCGA-G3-A7M7-01A-12R-A352-07	TCGA-G3-A7M7-01	0	361	0	361	0	361	-845.955	-80.8107	-926.765	0.892044
TCGA-CC-A5UE-01A-11R-A28V-07	TCGA-CC-A5UE-01	1	272	1	175	1	175	-1572.56	-29.6869	-1602.25	0.932401
TCGA-DD-AACX-01A-11R-A41C-07	TCGA-DD-AACX-01	0	170	1	42	1	42	-1320.19	173.64	-1146.55	0.906158
TCGA-DD-AADD-01A-11R-A41C-07	TCGA-DD-AADD-01	0	1231	0	1231	0	1231	-1538.47	-118.34	-1656.81	0.935266
TCGA-DD-A73F-01A-11R-A32O-07	TCGA-DD-A73F-01	0	1085	0	1085	0	1085	-201.395	1808.4	1607.01	0.66681
TCGA-CC-A9FW-01A-11R-A37K-07	TCGA-CC-A9FW-01	0	248	1	153	1	153	-1393.06	144.868	-1248.19	0.912367
TCGA-BC-A10R-01A-11R-A131-07	TCGA-BC-A10R-01	1	308	1	199	1	199	-128.863	-10.6964	-139.559	0.833987
TCGA-ES-A2HT-01A-12R-A180-07	TCGA-ES-A2HT-01	0	438	0	438	0	438	-260.396	715.781	455.385	0.782682
TCGA-DD-A3A4-01A-11R-A22L-07	TCGA-DD-A3A4-01	1	612	1	87	1	87	-925.35	-485.645	-1410.99	0.921889
TCGA-WX-AA46-01A-11R-A39D-07	TCGA-WX-AA46-01	0	756	0	756	0	756	-330.531	422.926	92.3952	0.81472
TCGA-DD-A1EE-01A-11R-A131-07	TCGA-DD-A1EE-01	1	349	1	44	1	44	-1084.53	-255.333	-1339.86	0.917793
TCGA-FV-A4ZQ-01A-11R-A266-07	TCGA-FV-A4ZQ-01	0	12	0	12	0	12	-1026.98	1773.93	746.949	0.755335

## Sheet: DSS
ID	DSS	DSS.time	StromalScore	ImmuneScore	ESTIMATEScore	TumorPurity
TCGA-GJ-A3OU-01A-31R-A38B-07	0	879	907.54	2645.77	3553.31	0.429757
TCGA-G3-A7M9-01A-23R-A352-07	NA	56	-1407.2	-375.777	-1782.98	0.94166
TCGA-ED-A627-01A-12R-A311-07	0	423	722.498	1937.92	2660.42	0.544079
TCGA-DD-AACB-01A-11R-A41C-07	0	2324	-738.201	1433.5	695.299	0.760282
TCGA-CC-5264-01A-01R-A131-07	0	102	-1046.94	62.5018	-984.433	0.895838
TCGA-DD-AAW3-01A-11R-A41C-07	0	1633	-969.019	-338.064	-1307.08	0.915872
TCGA-DD-AA3A-01A-11R-A37K-07	0	410	-1530.18	-65.196	-1595.37	0.932036
TCGA-DD-AAEI-01A-11R-A41C-07	0	1531	-693.16	738.771	45.6115	0.818683
TCGA-DD-AADF-01A-11R-A41C-07	0	115	-1213.02	283.706	-929.31	0.892213
TCGA-UB-A7MA-01A-11R-A33R-07	0	848	-868.261	-52.3357	-920.597	0.891634
TCGA-EP-A3JL-01A-11R-A213-07	0	303	-40.0571	1357.69	1317.63	0.697853
TCGA-DD-AACZ-01A-11R-A41C-07	0	171	-500.886	2079.5	1578.61	0.66991
TCGA-2Y-A9HA-01A-11R-A39D-07	1	36	-1062.88	-67.23	-1130.11	0.905135
TCGA-ED-A82E-01A-11R-A352-07	0	408	-420.357	240.733	-179.624	0.837218
TCGA-ED-A66Y-01A-11R-A311-07	0	296	-1274.17	-870.173	-2144.34	0.95818
TCGA-DD-AACF-01A-11R-A41C-07	1	365	-1051.56	691.312	-360.247	0.851421
TCGA-MI-A75G-01A-11R-A32O-07	0	698	-1144.34	-312.571	-1456.91	0.924479
TCGA-DD-AAEG-01A-11R-A39D-07	0	719	-1046.88	-257.324	-1304.2	0.915702
TCGA-DD-AAD2-01A-11R-A41C-07	0	658	255.901	1009.59	1265.49	0.703315
TCGA-UB-A7MB-01A-11R-A33R-07	0	601	-1302.51	-495.302	-1797.81	0.942391
TCGA-DD-AACQ-01A-11R-A41C-07	1	432	-1535.37	-575.324	-2110.69	0.956755
TCGA-2Y-A9GW-01A-11R-A38B-07	1	1271	0.373676	1490.52	1490.9	0.679413
TCGA-G3-A3CG-01A-11R-A213-07	0	673	-464.594	437.335	-27.2592	0.824779
TCGA-DD-AAEH-01A-11R-A41C-07	0	784	-234.011	1490.23	1256.21	0.704282
TCGA-G3-A5SI-01A-31R-A27V-07	1	768	-1098.79	-523.281	-1622.07	0.933449
TCGA-KR-A7K2-01A-12R-A33R-07	0	829	-430.133	583.191	153.058	0.809525
TCGA-RC-A6M3-01A-11R-A32O-07	0	0	-1455.43	234.518	-1220.92	0.910721
TCGA-EP-A3RK-01A-11R-A22L-07	0	363	-146.059	1781.09	1635.03	0.663738
TCGA-UB-A7MC-01A-11R-A33R-07	0	500	-1385.7	-506.966	-1892.66	0.946957
TCGA-MI-A75H-01A-11R-A32O-07	0	747	-576.347	1051.68	475.329	0.780857
TCGA-DD-AADY-01A-11R-A41C-07	0	555	-707	-426.439	-1133.44	0.905342
TCGA-BC-A10W-01A-11R-A131-07	1	91	-668.048	475.215	-192.834	0.838277
TCGA-DD-AADN-01A-11R-A41C-07	0	898	-1169.21	2017.54	848.325	0.7455
TCGA-DD-AAVX-01A-11R-A41C-07	0	1718	-529.832	964.954	435.122	0.78453
TCGA-QA-A7B7-01A-11R-A32O-07	0	94	-1373.3	-70.1592	-1443.46	0.923724
TCGA-G3-A25Z-01A-11R-A16W-07	0	655	-509.499	427.947	-81.5521	0.829259
TCGA-DD-A39V-01A-11R-A213-07	1	643	-445.989	1388.62	942.633	0.736202
TCGA-5C-A9VH-01A-11R-A37K-07	0	322	-321.223	43.1866	-278.036	0.84503
TCGA-ZP-A9D4-01A-11R-A37K-07	0	395	-1015.84	-241.483	-1257.33	0.912915
TCGA-G3-AAV6-01A-21R-A37K-07	1	65	-1136.52	-349.989	-1486.5	0.926126
TCGA-DD-A4NG-01A-11R-A27V-07	1	802	-888.455	461.926	-426.529	0.856484
TCGA-BC-A10X-01A-11R-A131-07	0	770	330.615	859.368	1189.98	0.711151
TCGA-DD-A1EF-01A-11R-A131-07	1	394	-682.192	603.686	-78.5055	0.829009
TCGA-G3-A5SL-01A-11R-A27V-07	0	621	-717.057	-74.173	-791.23	0.882876
TCGA-EP-A12J-01A-11R-A131-07	0	570	-908.701	21.9141	-886.787	0.889376
TCGA-T1-A6J8-01A-11R-A32O-07	0	23	-556.833	179.683	-377.149	0.85272
TCGA-G3-AAV0-01A-11R-A37K-07	0	476	-861.232	218.41	-642.822	0.872438
TCGA-CC-A9FV-01A-11R-A37K-07	0	0	1042.89	2269.13	3312.02	0.461463
TCGA-XR-A8TG-01A-11R-A36F-07	0	898	-528.65	271.888	-256.762	0.843356
TCGA-ED-A8O5-01A-11R-A36F-07	0	406	-759.107	-213.478	-972.585	0.895063
TCGA-DD-AACO-01A-11R-A41C-07	0	1876	-542.343	916.964	374.62	0.790006
TCGA-DD-A3A3-01A-11R-A22L-07	NA	535	-1415.87	272.634	-1143.23	0.905952
TCGA-2Y-A9H6-01A-11R-A39D-07	0	357	-47.5923	1070.62	1023.03	0.728164
TCGA-LG-A9QD-01A-11R-A38B-07	0	366	-825.823	487.403	-338.421	0.849737
TCGA-FV-A496-01A-11R-A266-07	0	10	-1361.86	-601.55	-1963.41	0.950243
TCGA-DD-AAE0-01A-11R-A41C-07	0	555	-704.62	34.2492	-670.371	0.874407
TCGA-DD-AACI-01A-11R-A41C-07	0	1618	-210.613	1875.8	1665.18	0.660421
TCGA-DD-AAD0-01A-11R-A41C-07	0	137	-1483.26	-266.776	-1750.04	0.940022
TCGA-WQ-AB4B-01A-11R-A41C-07	0	395	-310.83	616.511	305.681	0.79617
TCGA-DD-AACW-01A-11R-A41C-07	0	1424	-1157.06	152.497	-1004.56	0.897147
TCGA-BD-A2L6-01A-11R-A213-07	0	1363	-729.164	397.407	-331.757	0.84922
TCGA-DD-A3A6-01A-11R-A22L-07	0	3258	635.761	1292.63	1928.39	0.630925
TCGA-DD-AAW1-01A-11R-A41C-07	0	1989	-984.081	-163.034	-1147.12	0.906193
TCGA-FV-A3I0-01A-11R-A22L-07	0	848	-495.208	337.778	-157.431	0.835432
TCGA-DD-A39X-01A-11R-A213-07	1	1694	-486.46	546.631	60.1712	0.817454
TCGA-3K-AAZ8-01A-12R-A39D-07	0	396	-1083.62	421.92	-661.702	0.873789
TCGA-K7-A5RF-01A-11R-A28V-07	0	631	270.262	1353.12	1623.39	0.665016
TCGA-DD-A115-01A-11R-A131-07	1	2542	-374.76	442.374	67.6132	0.816824
TCGA-ED-A7PY-01A-11R-A33R-07	0	390	-1377.19	-271.184	-1648.38	0.934827
TCGA-ED-A66X-01A-11R-A311-07	0	406	311	923.775	1234.77	0.706513
TCGA-ZP-A9CY-01A-11R-A38B-07	0	782	-126.423	620.683	494.26	0.779118
TCGA-DD-AACG-01A-11R-A41C-07	1	469	-1260.11	764.891	-495.222	0.861645
TCGA-DD-A73B-01A-12R-A32O-07	1	283	-1209.1	-386.648	-1595.75	0.932056
TCGA-RC-A7S9-01A-11R-A33R-07	0	640	-1240.62	525.255	-715.37	0.877593
TCGA-BC-A10S-01A-22R-A131-07	1	1423	-4.02593	1160.81	1156.78	0.714568
TCGA-DD-A4NB-01A-12R-A266-07	0	989	1003.19	881.006	1884.19	0.635944
TCGA-CC-A5UC-01A-11R-A28V-07	1	347	-304.271	386.723	82.4518	0.815566
TCGA-EP-A26S-01A-11R-A16W-07	0	608	-952.665	-326.428	-1279.09	0.914214
TCGA-K7-A6G5-01A-11R-A311-07	0	512	-403.983	845.26	441.277	0.78397
TCGA-2Y-A9H1-01A-11R-A38B-07	1	1229	-914.584	1125.72	211.131	0.804491
TCGA-G3-A25S-01A-11R-A16W-07	1	416	-1084.4	640.699	-443.699	0.857782
TCGA-DD-AAE3-01A-11R-A41C-07	0	566	-235.266	397.927	162.661	0.808696
TCGA-2Y-A9H3-01A-11R-A38B-07	0	1516	-202.953	1792.41	1589.45	0.668727
TCGA-CC-5261-01A-01R-A131-07	0	97	50.5347	1123.3	1173.84	0.712815
TCGA-BC-A217-01A-11R-A155-07	0	1397	-1180.36	685.461	-494.899	0.861621
TCGA-MI-A75C-01A-11R-A32O-07	0	291	-1497.72	611.681	-886.042	0.889326
TCGA-DD-AAVY-01A-11R-A41C-07	0	1970	-1225.6	-315.669	-1541.27	0.929129
TCGA-DD-AADG-01A-11R-A41C-07	0	1145	-1101.26	-435.733	-1536.99	0.928896
TCGA-2Y-A9H7-01A-11R-A39D-07	0	1168	-1227.82	309.81	-918.013	0.891462
TCGA-BW-A5NO-01A-11R-A27V-07	0	20	-743.863	508.361	-235.501	0.841675
TCGA-MR-A520-01A-11R-A266-07	0	229	-795.098	185.987	-609.11	0.870008
TCGA-FV-A3R2-01A-11R-A22L-07	0	194	-1135.54	115.853	-1019.68	0.898125
TCGA-DD-A1EG-01A-11R-A213-07	1	1372	-55.0819	1390.73	1335.65	0.695956
TCGA-CC-A7IF-01A-11R-A33J-07	1	649	-1151.94	-374.849	-1526.79	0.928341
TCGA-DD-AADC-01A-11R-A41C-07	1	425	-1145.44	-136.75	-1282.19	0.914399
TCGA-EP-A2KA-01A-11R-A180-07	1	627	-830.793	1458.26	627.465	0.766712
TCGA-DD-A39Z-01A-11R-A213-07	0	601	-1428.31	-229.049	-1657.36	0.935294
TCGA-DD-AAE7-01A-11R-A41C-07	0	644	-263.936	871.955	608.019	0.768542
TCGA-YA-A8S7-01A-11R-A37K-07	1	412	98.8046	1810.67	1909.48	0.633076
TCGA-CC-5260-01A-01R-A131-07	0	87	37.9601	679.291	717.251	0.758185
TCGA-BC-A3KF-01A-11R-A213-07	0	8	-878.812	-110.937	-989.749	0.896184
TCGA-DD-AADI-01A-11R-A41C-07	0	1085	-229.428	1585.04	1355.61	0.693849
TCGA-DD-A3A5-01A-11R-A22L-07	1	3125	-705.848	115.266	-590.583	0.868664
TCGA-FV-A3I1-01A-11R-A22L-07	0	247	-380.118	882.698	502.579	0.778352
TCGA-G3-A25U-01A-11R-A16W-07	0	1636	-1141.28	-245.176	-1386.46	0.920487
TCGA-DD-AADB-01A-11R-A41C-07	0	1242	-930.461	1228.37	297.912	0.796859
TCGA-G3-AAV1-01A-11R-A38B-07	1	359	-808.537	-59.9313	-868.468	0.888144
TCGA-G3-AAUZ-01A-11R-A38B-07	0	480	-430.058	1030.32	600.258	0.76927
TCGA-G3-AAV4-01A-11R-A38B-07	0	27	-977.499	-120.144	-1097.64	0.903098
TCGA-FV-A3R3-01A-11R-A22L-07	0	366	417.305	808.465	1225.77	0.707448
TCGA-2Y-A9H4-01A-11R-A38B-07	0	1452	-837.523	567.57	-269.952	0.844395
TCGA-CC-A3M9-01A-11R-A213-07	1	300	861.451	2873.21	3734.66	0.405572
TCGA-DD-A4NJ-01A-11R-A27V-07	0	928	-236.395	844.504	608.109	0.768533
TCGA-DD-AACH-01A-11R-A41C-07	0	195	-804.426	335.945	-468.481	0.859646
TCGA-CC-A8HT-01A-11R-A36F-07	1	140	-1111.89	808.163	-303.723	0.84704
TCGA-DD-AAEB-01A-11R-A41C-07	0	478	-831.229	372.481	-458.748	0.858915
TCGA-DD-A4NE-01A-11R-A27V-07	1	660	-768.446	-257.231	-1025.68	0.898512
TCGA-DD-A114-01A-11R-A131-07	0	1149	256.525	1824.54	2081.06	0.61338
TCGA-5C-AAPD-01A-21R-A39D-07	0	20	-307.449	1730.86	1423.41	0.686649
TCGA-DD-A1EA-01A-11R-A131-07	0	2415	-957.168	711.366	-245.802	0.842491
TCGA-XR-A8TD-01A-12R-A39D-07	0	1030	372.805	1923.31	2296.12	0.588147
TCGA-ZS-A9CG-01A-11R-A37K-07	0	341	-784.666	78.3451	-706.32	0.876955
TCGA-2Y-A9H2-01A-12R-A38B-07	0	1731	-1042.26	570.281	-471.977	0.859908
TCGA-FV-A2QQ-01A-11R-A22L-07	0	729	-497.124	859.158	362.034	0.791138
TCGA-CC-A3MC-01A-11R-A22L-07	0	363	-590.679	314.927	-275.752	0.844851
TCGA-DD-AAE1-01A-11R-A41C-07	0	552	-1188.08	326.557	-861.52	0.887675
TCGA-DD-A4NN-01A-11R-A28V-07	1	899	-887.508	-439.676	-1327.18	0.917052
TCGA-DD-AACK-01A-11R-A41C-07	0	9	-1102.54	125.111	-977.425	0.89538
TCGA-G3-A5SK-01A-11R-A27V-07	0	744	-349.297	998.883	649.587	0.764624
TCGA-DD-A4NP-01A-11R-A28V-07	0	3308	-771.549	180.3	-591.249	0.868713
TCGA-DD-AADL-01A-11R-A41C-07	0	636	-1275.62	-356.877	-1632.5	0.933997
TCGA-4R-AA8I-01A-11R-A38B-07	1	262	-789.135	163.254	-625.881	0.87122
TCGA-KR-A7K8-01A-11R-A33J-07	0	906	-226.859	1629.49	1402.63	0.688863
TCGA-DD-A73A-01A-12R-A32O-07	0	728	-949.252	860.482	-88.7703	0.82985
TCGA-BC-A8YO-01A-11R-A37K-07	0	562	-956.009	1212.84	256.828	0.800488
TCGA-2Y-A9GY-01A-11R-A38B-07	1	757	-1007.68	1766.26	758.58	0.754215
TCGA-DD-AAVR-01A-11R-A41C-07	0	2513	360.266	1716.87	2077.14	0.613835
TCGA-DD-AAE6-01A-11R-A41C-07	0	141	-1665.88	-908.901	-2574.78	0.974337
TCGA-G3-A25T-01A-11R-A16W-07	0	1553	-501.062	327.923	-173.139	0.836697
TCGA-BD-A3EP-01A-11R-A22L-07	0	409	140.133	1481.38	1621.51	0.665221
TCGA-FV-A23B-01A-11R-A16W-07	1	1852	-706.636	479.006	-227.63	0.841051
TCGA-DD-AACT-01A-11R-A41C-07	0	1562	-397.373	952.156	554.783	0.773518
TCGA-CC-A7IL-01A-11R-A33R-07	1	278	-1607.08	-492.656	-2099.73	0.956286
TCGA-G3-AAV7-01A-11R-A38B-07	0	361	-713.666	817.475	103.81	0.813748
TCGA-DD-A11D-01A-11R-A131-07	1	1560	-695.096	20.6693	-674.427	0.874695
TCGA-CC-A9FU-01A-11R-A37K-07	0	0	-1636.45	-107.131	-1743.58	0.939698
TCGA-2Y-A9HB-01A-11R-A39D-07	0	260	-282.09	948.354	666.264	0.763044
TCGA-DD-AAC9-01A-11R-A41C-07	0	347	127.515	1125.5	1253.01	0.704616
TCGA-DD-AAVU-01A-11R-A41C-07	0	2202	-1241.14	-3.45844	-1244.6	0.912151
TCGA-DD-AAEK-01A-11R-A41C-07	0	1067	-213.694	1535.26	1321.57	0.697439
TCGA-CC-5258-01A-01R-A131-07	0	129	-599.192	613.18	13.9885	0.82134
TCGA-FV-A495-01A-11R-A266-07	0	1	21.6713	1323.65	1345.32	0.694937
TCGA-UB-A7MF-01A-11R-A33J-07	1	214	-660.988	1826.8	1165.82	0.71364
TCGA-CC-A7IK-01A-12R-A33R-07	1	262	-1358.02	-595.097	-1953.12	0.949771
TCGA-DD-AAED-01A-12R-A41C-07	0	763	-1586.31	156.068	-1430.24	0.922979
TCGA-CC-5262-01A-01R-A131-07	0	103	200.284	1177.62	1377.91	0.691489
TCGA-LG-A6GG-01A-11R-A311-07	0	387	-1138.03	-105.212	-1243.25	0.912069
TCGA-G3-A7M6-01A-11R-A33R-07	0	632	-686.813	250.601	-436.212	0.857217
TCGA-2Y-A9GV-01A-11R-A38B-07	1	2532	-163.43	890.929	727.5	0.757203
TCGA-DD-AACJ-01A-11R-A41C-07	0	2102	-1311.49	-47.0489	-1358.54	0.918878
TCGA-DD-A3A2-01A-11R-A213-07	0	2131	-614.734	151.221	-463.513	0.859273
TCGA-ED-A97K-01A-21R-A38B-07	0	6	-386.42	518.455	132.035	0.811332
TCGA-CC-A5UD-01A-11R-A28V-07	1	304	-1212.35	-241.575	-1453.92	0.924312
TCGA-DD-AAE9-01A-11R-A41C-07	0	722	-1435.44	-3.38484	-1438.83	0.923464
TCGA-DD-AAC8-01A-11R-A41C-07	0	16	-970.83	401.052	-569.778	0.867147
TCGA-WJ-A86L-01A-12R-A39D-07	0	345	-1420.72	-171.038	-1591.76	0.931844
TCGA-DD-A4NF-01A-11R-A27V-07	0	942	-900.313	-447.58	-1347.89	0.91826
TCGA-DD-A1EB-01A-11R-A131-07	0	2017	-626.92	89.9632	-536.957	0.864738
TCGA-GJ-A9DB-01A-11R-A37K-07	NA	67	-251.217	342.838	91.6213	0.814786
TCGA-2Y-A9H9-01A-21R-A39D-07	0	697	-726.527	313.764	-412.763	0.855439
TCGA-DD-AAD5-01A-11R-A41C-07	0	1345	-1012.93	825.415	-187.517	0.837851
TCGA-5R-AAAM-01A-12R-A41C-07	0	46	500.279	1105.16	1605.44	0.666981
TCGA-ED-A4XI-01A-11R-A266-07	0	819	169.094	1149.98	1319.07	0.697702
TCGA-BC-A10Y-01A-11R-A131-07	1	711	-885.92	431.423	-454.497	0.858596
TCGA-DD-A73E-01A-12R-A32O-07	0	44	-1221.86	-806.232	-2028.09	0.953158
TCGA-DD-AADK-01A-11R-A41C-07	0	1049	-240.923	788.765	547.842	0.774163
TCGA-EP-A2KB-01A-11R-A180-07	1	596	-1175.19	-43.9062	-1219.1	0.91061
TCGA-XR-A8TF-01A-11R-A36F-07	0	693	-1153.52	-131.962	-1285.48	0.914594
TCGA-DD-AADM-01A-11R-A41C-07	0	12	-627.932	511.372	-116.56	0.83212
TCGA-GJ-A6C0-01A-12R-A311-07	NA	31	-594.722	1103.19	508.471	0.777809
TCGA-DD-A1EJ-01A-11R-A155-07	1	1005	-1089.98	281.09	-808.891	0.884091
TCGA-2V-A95S-01A-11R-A37K-07	0	NA	-464.135	2187.99	1723.85	0.65393
TCGA-K7-AAU7-01A-11R-A38B-07	0	359	-301.385	650.866	349.481	0.792263
TCGA-DD-AAW0-01A-11R-A41C-07	0	2015	-39.2679	1089.3	1050.03	0.725442
TCGA-XR-A8TE-01A-11R-A36F-07	0	925	-572.728	-11.0594	-583.788	0.86817
TCGA-G3-A6UC-01A-21R-A33J-07	0	671	-1222.01	-299.09	-1521.1	0.92803
TCGA-BC-A112-01A-11R-A131-07	0	153	-308.571	474.911	166.34	0.808378
TCGA-ED-A459-01A-11R-A266-07	0	910	-909.769	540.468	-369.3	0.852118
TCGA-NI-A8LF-01A-11R-A36F-07	0	799	-421.618	46.9992	-374.618	0.852526
TCGA-BC-A5W4-01A-11R-A28V-07	0	547	-1510.01	-672.101	-2182.11	0.959752
TCGA-CC-A7IE-01A-21R-A38B-07	1	217	-703.825	1249.83	546.006	0.774334
TCGA-5R-AA1D-01A-11R-A38B-07	0	449	1184.88	1028.79	2213.67	0.597891
TCGA-CC-A7II-01A-11R-A33J-07	0	399	-811.961	-369.776	-1181.74	0.90833
TCGA-DD-A73C-01A-12R-A33J-07	0	701	-168.095	223.793	55.6972	0.817832
TCGA-KR-A7K7-01A-11R-A33J-07	0	951	-1161.14	1202.42	41.2794	0.819048
TCGA-DD-AAVP-01A-11R-A41C-07	0	2752	-675.646	78.8789	-596.767	0.869114
TCGA-DD-AAD1-01A-11R-A41C-07	0	564	247.986	1364.46	1612.45	0.666214
TCGA-DD-AADS-01A-11R-A41C-07	0	474	-760.997	1426.36	665.365	0.763129
TCGA-DD-A3A1-01A-11R-A213-07	0	233	-1086.59	901.014	-185.576	0.837695
TCGA-RC-A7SB-01A-21R-A352-07	0	588	-1099.32	16.8618	-1082.46	0.902139
TCGA-DD-AAVZ-01A-11R-A41C-07	0	1900	-836.917	75.7187	-761.198	0.880798
TCGA-2Y-A9GT-01A-11R-A38B-07	1	1624	-204.609	1524.92	1320.31	0.697571
TCGA-DD-AADQ-01A-11R-A41C-07	0	436	-1222.64	530.056	-692.582	0.875984
TCGA-DD-A119-01A-11R-A131-07	NA	223	-406.79	328.099	-78.6911	0.829024
TCGA-DD-A4NO-01A-11R-A28V-07	0	2245	-402.153	153.021	-249.133	0.842754
TCGA-BW-A5NP-01A-11R-A27V-07	0	0	-1409.93	-567.351	-1977.28	0.950875
TCGA-DD-A4NA-01A-11R-A266-07	0	1008	-442.749	565.533	122.784	0.812126
TCGA-MI-A75E-01A-11R-A32O-07	0	507	-183.359	931.638	748.279	0.755207
TCGA-BC-A10Q-01A-11R-A131-07	1	1135	-730.442	193.068	-537.374	0.864769
TCGA-DD-AAEE-01A-11R-A41C-07	0	810	-1024.23	-252.282	-1276.52	0.914061
TCGA-BC-A3KG-01A-11R-A213-07	0	680	-1339.24	-126.963	-1466.2	0.924998
TCGA-DD-A3A7-01A-11R-A22L-07	1	419	-1183.84	293.629	-890.208	0.889606
TCGA-CC-A8HV-01A-11R-A36F-07	1	279	-1293.1	-449.356	-1742.46	0.939642
TCGA-DD-AACN-01A-11R-A41C-07	0	1302	-338.947	340.225	1.27818	0.822403
TCGA-G3-A25V-01A-11R-A16W-07	0	860	16.8276	1161.11	1177.94	0.712393
TCGA-DD-AAVS-01A-11R-A41C-07	0	1823	-726.174	195.474	-530.7	0.864276
TCGA-CC-A3MB-01A-11R-A213-07	1	315	-1014.46	11.0438	-1003.41	0.897072
TCGA-ZP-A9D0-01A-11R-A37K-07	0	1091	-774.63	-214.972	-989.603	0.896175
TCGA-DD-AAE2-01A-11R-A41C-07	0	638	-264.031	926.297	662.266	0.763423
TCGA-RG-A7D4-01A-12R-A33R-07	0	1098	-1154.33	1538.88	384.545	0.789112
TCGA-DD-A4NK-01A-11R-A28V-07	1	1210	-765.805	-114.822	-880.627	0.888963
TCGA-DD-A39W-01A-11R-A213-07	NA	827	-1038.15	-72.1218	-1110.27	0.903893
TCGA-DD-AADJ-01A-11R-A41C-07	0	1066	-1063.12	446.38	-616.74	0.87056
TCGA-DD-AACA-01A-11R-A41C-07	0	2301	-1088.65	-255.839	-1344.49	0.918062
TCGA-CC-5263-01A-01R-A131-07	0	129	-847.686	627.147	-220.54	0.840487
TCGA-DD-A11C-01A-11R-A131-07	0	662	-136.658	452.435	315.777	0.795272
TCGA-DD-A4NL-01A-11R-A28V-07	0	1711	-253.079	394.877	141.798	0.810494
TCGA-HP-A5N0-01A-11R-A28V-07	1	1147	145.58	553.615	699.196	0.75991
TCGA-ZP-A9D1-01A-11R-A38B-07	0	21	-233.69	636.418	402.728	0.78747
TCGA-ES-A2HS-01A-11R-A180-07	0	688	-545.085	-19.9664	-565.051	0.866802
TCGA-UB-AA0U-01A-11R-A38B-07	0	327	8.37085	748.956	757.327	0.754336
TCGA-DD-AAD3-01A-11R-A41C-07	0	1295	-7.399	702.88	695.481	0.760265
TCGA-BW-A5NQ-01A-11R-A27V-07	0	0	-859.886	1408.79	548.899	0.774065
TCGA-DD-A11B-01A-11R-A131-07	0	14	-922.613	-328.277	-1250.89	0.912529
TCGA-G3-A25Y-01A-11R-A16W-07	1	452	-215.857	583.337	367.48	0.790648
TCGA-CC-A7IH-01A-11R-A33J-07	0	365	-1022.56	-480.905	-1503.47	0.927063
TCGA-MR-A8JO-01A-12R-A36F-07	0	330	758.38	1462.89	2221.27	0.596997
TCGA-2Y-A9GX-01A-11R-A38B-07	0	2442	715.417	1717.96	2433.38	0.571733
TCGA-DD-AACS-01A-11R-A41C-07	0	1804	-1284.66	-381.287	-1665.94	0.93574
TCGA-K7-A5RG-01A-11R-A28V-07	0	519	-257.947	2516.85	2258.9	0.592556
TCGA-DD-A1ED-01A-11R-A155-07	0	2301	-136.844	1132.59	995.745	0.730904
TCGA-DD-AADV-01A-11R-A39D-07	0	574	-470.538	159.476	-311.062	0.847612
TCGA-DD-AAD8-01A-11R-A41C-07	0	1219	-1027.51	110.257	-917.253	0.891412
TCGA-DD-A4NQ-01A-21R-A28V-07	1	373	-1010.63	618.874	-391.752	0.853838
TCGA-NI-A4U2-01A-11R-A28V-07	1	1791	-515.025	172.087	-342.938	0.850086
TCGA-G3-AAV5-01A-11R-A37K-07	0	354	-1150.5	67.2839	-1083.22	0.902187
TCGA-G3-AAV2-01A-11R-A37K-07	0	372	-837.936	64.9713	-772.965	0.881614
TCGA-BC-A216-01A-11R-A155-07	0	1351	-1035.1	864.061	-171.041	0.836528
TCGA-DD-AAEA-01A-11R-A41C-07	0	575	-1070.59	700.332	-370.255	0.852191
TCGA-EP-A2KC-01A-11R-A213-07	0	19	-851.809	118.032	-733.778	0.878885
TCGA-RC-A6M5-01A-11R-A32O-07	0	15	328.112	200.148	528.259	0.77598
TCGA-2Y-A9GU-01A-11R-A38B-07	0	1939	-1058.96	-210.181	-1269.14	0.913622
TCGA-BC-A10T-01A-11R-A131-07	1	837	100.9	185.316	286.216	0.797896
TCGA-RC-A7SK-01A-11R-A352-07	0	472	-1206.78	-385.532	-1592.31	0.931873
TCGA-BC-A69H-01A-11R-A311-07	0	444	-869.075	915.595	46.5202	0.818606
TCGA-DD-AAVW-01A-11R-A41C-07	0	2317	210.925	812.512	1023.44	0.728124
TCGA-DD-AADO-01A-11R-A41C-07	0	453	-840.606	1459.19	618.583	0.767549
TCGA-ZS-A9CD-01A-11R-A37K-07	NA	1386	-296.953	652.528	355.574	0.791717
TCGA-DD-AACU-01A-11R-A41C-07	0	1567	-739.494	419.425	-320.068	0.848313
TCGA-G3-A7M5-01A-11R-A33R-07	0	447	-1004.63	353.205	-651.424	0.873054
TCGA-WQ-A9G7-01A-11R-A37K-07	0	30	-1336	-296.835	-1632.83	0.934014
TCGA-G3-A5SJ-01A-11R-A27V-07	0	698	-642.024	1246.16	604.14	0.768906
TCGA-O8-A75V-01A-11R-A32O-07	0	538	-266.604	1182.33	915.725	0.73887
TCGA-ED-A5KG-01A-11R-A27V-07	0	854	534.161	3210.43	3744.6	0.404238
TCGA-CC-A8HU-01A-11R-A36F-07	1	344	-1239.86	-254.868	-1494.73	0.926581
TCGA-DD-AACV-01A-11R-A41C-07	0	1531	-1451.21	-753.183	-2204.39	0.960665
TCGA-CC-A8HS-01A-11R-A36F-07	1	300	-1214.43	-428.692	-1643.12	0.934553
TCGA-CC-A123-01A-11R-A131-07	0	219	-911.217	351.449	-559.768	0.866415
TCGA-DD-A3A9-01A-11R-A266-07	1	931	-93.1589	861.606	768.447	0.753264
TCGA-DD-A4ND-01A-11R-A266-07	0	2746	606.159	1158.07	1764.23	0.649434
TCGA-ZP-A9CV-01A-11R-A38B-07	1	1088	-197.697	942.835	745.138	0.75551
TCGA-ED-A7XO-01A-11R-A352-07	0	427	-192.957	786.467	593.511	0.769903
TCGA-ZP-A9D2-01A-11R-A38B-07	1	765	-562.036	227.712	-334.325	0.849419
TCGA-2Y-A9GZ-01A-11R-A39D-07	1	848	-1050.22	-420.713	-1470.93	0.925262
TCGA-DD-A11A-01A-11R-A131-07	0	79	-1112.99	-225.475	-1338.46	0.917711
TCGA-LG-A9QC-01A-11R-A37K-07	0	425	-996.093	-415.401	-1411.49	0.921917
TCGA-DD-A4NV-01A-11R-A311-07	0	2398	-259.465	231.164	-28.3011	0.824865
TCGA-CC-A7IG-01A-11R-A33J-07	1	299	-995.92	455.826	-540.094	0.864969
TCGA-DD-AADR-01A-11R-A41C-07	0	2028	-871.713	545.697	-326.017	0.848775
TCGA-BC-A110-01A-11R-A131-07	1	2116	628.231	1583.76	2211.99	0.598089
TCGA-DD-A118-01A-11R-A131-07	0	3437	-397.932	24.4191	-373.513	0.852441
TCGA-UB-A7ME-01A-11R-A33J-07	0	486	-458.324	1191.48	733.156	0.756661
TCGA-DD-A4NI-01A-11R-A27V-07	0	816	-174.905	1026.32	851.419	0.745197
TCGA-G3-A3CI-01A-11R-A213-07	0	180	-388.656	959.738	571.082	0.772
TCGA-DD-AACY-01A-11R-A41C-07	0	1450	-797.703	308.296	-489.407	0.861211
TCGA-2Y-A9H5-01A-11R-A38B-07	1	555	-342.667	257.081	-85.5862	0.82959
TCGA-ZS-A9CF-01A-11R-A38B-07	0	2412	-907.516	378.119	-529.397	0.86418
TCGA-RC-A6M6-01A-11R-A32O-07	0	9	-1456.23	-35.3466	-1491.58	0.926407
TCGA-XR-A8TC-01A-11R-A36F-07	0	1339	-852.986	-245.969	-1098.95	0.903181
TCGA-RC-A7SF-01A-11R-A352-07	0	579	-1020.15	298.727	-721.423	0.878018
TCGA-CC-A7IJ-01A-11R-A33R-07	0	382	818.748	1950.73	2769.47	0.530578
TCGA-DD-A1EL-01A-11R-A155-07	1	415	-1359.48	201.455	-1158.03	0.906869
TCGA-BC-A10Z-01A-11R-A131-07	0	34	-1538.51	-767.421	-2305.93	0.964697
TCGA-G3-A5SM-01A-12R-A28V-07	0	520	43.6836	987.145	1030.83	0.727379
TCGA-DD-AAVQ-01A-11R-A41C-07	0	2728	-344.132	2030.7	1686.57	0.658061
TCGA-CC-5259-01A-31R-A213-07	0	250	-1365.9	574.587	-791.312	0.882882
TCGA-DD-AAE4-01A-11R-A41C-07	0	608	-2.04641	1777.08	1775.03	0.648228
TCGA-DD-AACL-01A-11R-A41C-07	NA	107	-548.012	1789.2	1241.19	0.705846
TCGA-DD-AADW-01A-11R-A39D-07	0	587	-573.82	-393.678	-967.498	0.89473
TCGA-DD-A39Y-01A-11R-A213-07	0	171	-1249.02	-4.87534	-1253.89	0.912709
TCGA-ED-A7PZ-01A-11R-A33R-07	0	6	-1543.62	-553.583	-2097.2	0.956177
TCGA-DD-AAD6-01A-11R-A41C-07	0	672	-1499.83	39.1827	-1460.65	0.924688
TCGA-RC-A6M4-01A-11R-A32O-07	0	22	-1319.35	-680.225	-1999.58	0.951883
TCGA-KR-A7K0-01A-12R-A33R-07	0	65	-574.175	287.507	-286.668	0.845707
TCGA-DD-A73D-01A-12R-A32O-07	0	693	-1584.47	-689.94	-2274.41	0.963469
TCGA-DD-AADU-01A-11R-A41C-07	0	554	-1330.84	-21.7792	-1352.62	0.918535
TCGA-G3-A3CJ-01A-11R-A213-07	0	594	-862.894	230.06	-632.834	0.87172
TCGA-DD-A1EI-01A-11R-A131-07	0	183	-28.2468	508.781	480.534	0.780379
TCGA-DD-A4NS-01A-11R-A311-07	1	2456	576.259	1239.75	1816.01	0.643636
TCGA-ED-A7PX-01A-51R-A352-07	0	6	9.77022	370.921	380.691	0.78946
TCGA-BD-A3ER-01A-11R-A213-07	0	1115	59.262	599.575	658.837	0.763748
TCGA-2Y-A9H0-01A-11R-A38B-07	0	3675	-1129.92	796.38	-333.537	0.849358
TCGA-DD-AACP-01A-11R-A41C-07	0	415	-1683.34	-319.457	-2002.8	0.952028
TCGA-2Y-A9GS-01A-12R-A38B-07	1	724	-573.327	619.086	45.7587	0.818671
TCGA-5R-AA1C-01A-11R-A41C-07	0	520	-863.554	331.589	-531.966	0.86437
TCGA-DD-AACE-01A-11R-A41C-07	0	2184	-770.353	-90.173	-860.526	0.887607
TCGA-WX-AA44-01A-11R-A39D-07	0	615	-973.423	366.419	-607.004	0.869856
TCGA-ED-A7XP-01A-11R-A352-07	0	400	-388.861	490.049	101.188	0.813971
TCGA-DD-A1EC-01A-21R-A131-07	0	602	-228.872	2452.51	2223.64	0.596718
TCGA-DD-AAVV-01A-11R-A41C-07	0	2455	34.7348	1461.03	1495.76	0.678889
TCGA-2Y-A9H8-01A-11R-A39D-07	1	633	-975.412	917.843	-57.569	0.827286
TCGA-RC-A7SH-01A-11R-A38B-07	0	468	-1304.3	-430.461	-1734.76	0.939254
TCGA-ZS-A9CE-01A-11R-A37K-07	0	1241	-1253.94	-540.113	-1794.05	0.942206
TCGA-BC-A10U-01A-11R-A131-07	1	837	-1311.32	38.3043	-1273.02	0.913853
TCGA-ZP-A9CZ-01A-11R-A38B-07	0	706	-284.793	1149.05	864.259	0.743939
TCGA-DD-AAW2-01A-11R-A41C-07	0	1855	-862.798	-268.061	-1130.86	0.905181
TCGA-G3-A25X-01A-11R-A16W-07	0	1779	-131.135	1496.43	1365.29	0.692825
TCGA-DD-AADA-01A-11R-A41C-07	0	1233	-335.41	1043.55	708.142	0.759056
TCGA-DD-AACD-01A-11R-A41C-07	1	381	-439.492	1053.12	613.629	0.768015
TCGA-G3-AAV3-01A-11R-A37K-07	0	412	-364.964	1376.59	1011.63	0.72931
TCGA-G3-A3CH-01A-11R-A22L-07	0	780	-474.939	583.876	108.938	0.81331
TCGA-G3-A3CK-01A-11R-A213-07	0	585	-751.53	706.088	-45.4429	0.826285
TCGA-5C-A9VG-01A-11R-A37K-07	0	328	-454.059	-330.404	-784.463	0.88241
TCGA-G3-A7M8-01A-11R-A33R-07	0	430	-329.421	280.809	-48.6125	0.826547
TCGA-DD-A4NR-01A-11R-A311-07	0	9	125.97	2330.72	2456.69	0.568922
TCGA-FV-A4ZP-01A-12R-A266-07	0	2486	-793.322	1223.48	430.162	0.784982
TCGA-UB-AA0V-01A-11R-A38B-07	0	314	104.647	607.332	711.98	0.758689
TCGA-DD-A116-01A-11R-A131-07	0	1622	-685.773	433.555	-252.217	0.842998
TCGA-DD-A1EH-01A-11R-A131-07	0	1495	-522.853	-121.763	-644.616	0.872566
TCGA-CC-A9FS-01A-11R-A37K-07	0	211	-1002.63	2.01921	-1000.61	0.89689
TCGA-DD-A1EK-01A-11R-A213-07	1	558	-409.747	799	389.253	0.788688
TCGA-CC-A3MA-01A-11R-A213-07	1	303	-509.908	-115.781	-625.688	0.871206
TCGA-DD-A4NH-01A-11R-A27V-07	0	917	-666.359	921.822	255.463	0.800609
TCGA-PD-A5DF-01A-11R-A27V-07	1	639	130.354	884.094	1014.45	0.729027
TCGA-UB-A7MD-01A-12R-A352-07	0	52	-294.65	932.213	637.563	0.76576
TCGA-BC-A69I-01A-11R-A311-07	0	387	-310.186	463.845	153.658	0.809473
TCGA-FV-A2QR-01A-11R-A213-07	1	581	-268.359	186.77	-81.5898	0.829262
TCGA-DD-AACC-01A-11R-A41C-07	1	1685	87.3614	2643.14	2730.5	0.535418
TCGA-WX-AA47-01A-11R-A39D-07	1	556	-1442.32	-442.977	-1885.3	0.946609
TCGA-MI-A75I-01A-11R-A32O-07	0	630	-1212.51	187.732	-1024.78	0.898454
TCGA-ED-A8O6-01A-11R-A36F-07	0	56	-991.686	-11.4781	-1003.16	0.897056
TCGA-CC-A1HT-01A-11R-A131-07	0	101	115.341	2125.9	2241.24	0.594643
TCGA-HP-A5MZ-01A-21R-A27V-07	0	91	593.878	1557.75	2151.63	0.605167
TCGA-DD-A113-01A-11R-A131-07	0	2425	-776.531	488.343	-288.187	0.845826
TCGA-DD-A3A8-01A-11R-A22L-07	0	11	-1162.38	-194.793	-1357.17	0.918799
TCGA-DD-AADP-01A-11R-A39D-07	0	458	-567.358	361.343	-206.014	0.83933
TCGA-DD-A73G-01A-22R-A32O-07	0	3478	-758.44	600.46	-157.98	0.835476
TCGA-G3-A7M7-01A-12R-A352-07	0	361	-845.955	-80.8107	-926.765	0.892044
TCGA-CC-A5UE-01A-11R-A28V-07	1	272	-1572.56	-29.6869	-1602.25	0.932401
TCGA-DD-AACX-01A-11R-A41C-07	0	170	-1320.19	173.64	-1146.55	0.906158
TCGA-DD-AADD-01A-11R-A41C-07	0	1231	-1538.47	-118.34	-1656.81	0.935266
TCGA-DD-A73F-01A-11R-A32O-07	0	1085	-201.395	1808.4	1607.01	0.66681
TCGA-CC-A9FW-01A-11R-A37K-07	0	248	-1393.06	144.868	-1248.19	0.912367
TCGA-BC-A10R-01A-11R-A131-07	1	308	-128.863	-10.6964	-139.559	0.833987
TCGA-ES-A2HT-01A-12R-A180-07	0	438	-260.396	715.781	455.385	0.782682
TCGA-DD-A3A4-01A-11R-A22L-07	1	612	-925.35	-485.645	-1410.99	0.921889
TCGA-WX-AA46-01A-11R-A39D-07	0	756	-330.531	422.926	92.3952	0.81472
TCGA-DD-A1EE-01A-11R-A131-07	1	349	-1084.53	-255.333	-1339.86	0.917793
TCGA-FV-A4ZQ-01A-11R-A266-07	0	12	-1026.98	1773.93	746.949	0.755335

## Sheet: DFI
ID	DFI	DFI.time	StromalScore	ImmuneScore	ESTIMATEScore	TumorPurity
TCGA-GJ-A3OU-01A-31R-A38B-07	NA	NA	907.54	2645.77	3553.31	0.429757
TCGA-G3-A7M9-01A-23R-A352-07	0	56	-1407.2	-375.777	-1782.98	0.94166
TCGA-ED-A627-01A-12R-A311-07	0	423	722.498	1937.92	2660.42	0.544079
TCGA-DD-AACB-01A-11R-A41C-07	0	2324	-738.201	1433.5	695.299	0.760282
TCGA-CC-5264-01A-01R-A131-07	NA	NA	-1046.94	62.5018	-984.433	0.895838
TCGA-DD-AAW3-01A-11R-A41C-07	0	1633	-969.019	-338.064	-1307.08	0.915872
TCGA-DD-AA3A-01A-11R-A37K-07	0	410	-1530.18	-65.196	-1595.37	0.932036
TCGA-DD-AAEI-01A-11R-A41C-07	1	491	-693.16	738.771	45.6115	0.818683
TCGA-DD-AADF-01A-11R-A41C-07	0	115	-1213.02	283.706	-929.31	0.892213
TCGA-UB-A7MA-01A-11R-A33R-07	NA	NA	-868.261	-52.3357	-920.597	0.891634
TCGA-EP-A3JL-01A-11R-A213-07	NA	NA	-40.0571	1357.69	1317.63	0.697853
TCGA-DD-AACZ-01A-11R-A41C-07	1	88	-500.886	2079.5	1578.61	0.66991
TCGA-2Y-A9HA-01A-11R-A39D-07	NA	NA	-1062.88	-67.23	-1130.11	0.905135
TCGA-ED-A82E-01A-11R-A352-07	0	408	-420.357	240.733	-179.624	0.837218
TCGA-ED-A66Y-01A-11R-A311-07	0	296	-1274.17	-870.173	-2144.34	0.95818
TCGA-DD-AACF-01A-11R-A41C-07	1	119	-1051.56	691.312	-360.247	0.851421
TCGA-MI-A75G-01A-11R-A32O-07	0	698	-1144.34	-312.571	-1456.91	0.924479
TCGA-DD-AAEG-01A-11R-A39D-07	0	719	-1046.88	-257.324	-1304.2	0.915702
TCGA-DD-AAD2-01A-11R-A41C-07	0	658	255.901	1009.59	1265.49	0.703315
TCGA-UB-A7MB-01A-11R-A33R-07	1	48	-1302.51	-495.302	-1797.81	0.942391
TCGA-DD-AACQ-01A-11R-A41C-07	1	105	-1535.37	-575.324	-2110.69	0.956755
TCGA-2Y-A9GW-01A-11R-A38B-07	1	1229	0.373676	1490.52	1490.9	0.679413
TCGA-G3-A3CG-01A-11R-A213-07	NA	NA	-464.594	437.335	-27.2592	0.824779
TCGA-DD-AAEH-01A-11R-A41C-07	1	644	-234.011	1490.23	1256.21	0.704282
TCGA-G3-A5SI-01A-31R-A27V-07	1	348	-1098.79	-523.281	-1622.07	0.933449
TCGA-KR-A7K2-01A-12R-A33R-07	0	829	-430.133	583.191	153.058	0.809525
TCGA-RC-A6M3-01A-11R-A32O-07	0	0	-1455.43	234.518	-1220.92	0.910721
TCGA-EP-A3RK-01A-11R-A22L-07	NA	NA	-146.059	1781.09	1635.03	0.663738
TCGA-UB-A7MC-01A-11R-A33R-07	1	359	-1385.7	-506.966	-1892.66	0.946957
TCGA-MI-A75H-01A-11R-A32O-07	1	301	-576.347	1051.68	475.329	0.780857
TCGA-DD-AADY-01A-11R-A41C-07	0	555	-707	-426.439	-1133.44	0.905342
TCGA-BC-A10W-01A-11R-A131-07	NA	NA	-668.048	475.215	-192.834	0.838277
TCGA-DD-AADN-01A-11R-A41C-07	0	898	-1169.21	2017.54	848.325	0.7455
TCGA-DD-AAVX-01A-11R-A41C-07	1	393	-529.832	964.954	435.122	0.78453
TCGA-QA-A7B7-01A-11R-A32O-07	NA	NA	-1373.3	-70.1592	-1443.46	0.923724
TCGA-G3-A25Z-01A-11R-A16W-07	0	655	-509.499	427.947	-81.5521	0.829259
TCGA-DD-A39V-01A-11R-A213-07	1	455	-445.989	1388.62	942.633	0.736202
TCGA-5C-A9VH-01A-11R-A37K-07	0	322	-321.223	43.1866	-278.036	0.84503
TCGA-ZP-A9D4-01A-11R-A37K-07	0	395	-1015.84	-241.483	-1257.33	0.912915
TCGA-G3-AAV6-01A-21R-A37K-07	1	44	-1136.52	-349.989	-1486.5	0.926126
TCGA-DD-A4NG-01A-11R-A27V-07	1	430	-888.455	461.926	-426.529	0.856484
TCGA-BC-A10X-01A-11R-A131-07	0	770	330.615	859.368	1189.98	0.711151
TCGA-DD-A1EF-01A-11R-A131-07	NA	NA	-682.192	603.686	-78.5055	0.829009
TCGA-G3-A5SL-01A-11R-A27V-07	0	621	-717.057	-74.173	-791.23	0.882876
TCGA-EP-A12J-01A-11R-A131-07	0	570	-908.701	21.9141	-886.787	0.889376
TCGA-T1-A6J8-01A-11R-A32O-07	NA	NA	-556.833	179.683	-377.149	0.85272
TCGA-G3-AAV0-01A-11R-A37K-07	0	476	-861.232	218.41	-642.822	0.872438
TCGA-CC-A9FV-01A-11R-A37K-07	0	0	1042.89	2269.13	3312.02	0.461463
TCGA-XR-A8TG-01A-11R-A36F-07	1	350	-528.65	271.888	-256.762	0.843356
TCGA-ED-A8O5-01A-11R-A36F-07	0	406	-759.107	-213.478	-972.585	0.895063
TCGA-DD-AACO-01A-11R-A41C-07	1	479	-542.343	916.964	374.62	0.790006
TCGA-DD-A3A3-01A-11R-A22L-07	0	535	-1415.87	272.634	-1143.23	0.905952
TCGA-2Y-A9H6-01A-11R-A39D-07	0	357	-47.5923	1070.62	1023.03	0.728164
TCGA-LG-A9QD-01A-11R-A38B-07	0	366	-825.823	487.403	-338.421	0.849737
TCGA-FV-A496-01A-11R-A266-07	0	10	-1361.86	-601.55	-1963.41	0.950243
TCGA-DD-AAE0-01A-11R-A41C-07	0	555	-704.62	34.2492	-670.371	0.874407
TCGA-DD-AACI-01A-11R-A41C-07	1	1432	-210.613	1875.8	1665.18	0.660421
TCGA-DD-AAD0-01A-11R-A41C-07	1	47	-1483.26	-266.776	-1750.04	0.940022
TCGA-WQ-AB4B-01A-11R-A41C-07	1	273	-310.83	616.511	305.681	0.79617
TCGA-DD-AACW-01A-11R-A41C-07	0	1424	-1157.06	152.497	-1004.56	0.897147
TCGA-BD-A2L6-01A-11R-A213-07	1	415	-729.164	397.407	-331.757	0.84922
TCGA-DD-A3A6-01A-11R-A22L-07	0	3258	635.761	1292.63	1928.39	0.630925
TCGA-DD-AAW1-01A-11R-A41C-07	0	1989	-984.081	-163.034	-1147.12	0.906193
TCGA-FV-A3I0-01A-11R-A22L-07	1	159	-495.208	337.778	-157.431	0.835432
TCGA-DD-A39X-01A-11R-A213-07	1	1032	-486.46	546.631	60.1712	0.817454
TCGA-3K-AAZ8-01A-12R-A39D-07	NA	NA	-1083.62	421.92	-661.702	0.873789
TCGA-K7-A5RF-01A-11R-A28V-07	1	205	270.262	1353.12	1623.39	0.665016
TCGA-DD-A115-01A-11R-A131-07	1	469	-374.76	442.374	67.6132	0.816824
TCGA-ED-A7PY-01A-11R-A33R-07	0	390	-1377.19	-271.184	-1648.38	0.934827
TCGA-ED-A66X-01A-11R-A311-07	1	124	311	923.775	1234.77	0.706513
TCGA-ZP-A9CY-01A-11R-A38B-07	0	782	-126.423	620.683	494.26	0.779118
TCGA-DD-AACG-01A-11R-A41C-07	1	125	-1260.11	764.891	-495.222	0.861645
TCGA-DD-A73B-01A-12R-A32O-07	1	240	-1209.1	-386.648	-1595.75	0.932056
TCGA-RC-A7S9-01A-11R-A33R-07	0	640	-1240.62	525.255	-715.37	0.877593
TCGA-BC-A10S-01A-22R-A131-07	1	1130	-4.02593	1160.81	1156.78	0.714568
TCGA-DD-A4NB-01A-12R-A266-07	1	912	1003.19	881.006	1884.19	0.635944
TCGA-CC-A5UC-01A-11R-A28V-07	0	347	-304.271	386.723	82.4518	0.815566
TCGA-EP-A26S-01A-11R-A16W-07	NA	NA	-952.665	-326.428	-1279.09	0.914214
TCGA-K7-A6G5-01A-11R-A311-07	NA	NA	-403.983	845.26	441.277	0.78397
TCGA-2Y-A9H1-01A-11R-A38B-07	1	321	-914.584	1125.72	211.131	0.804491
TCGA-G3-A25S-01A-11R-A16W-07	NA	NA	-1084.4	640.699	-443.699	0.857782
TCGA-DD-AAE3-01A-11R-A41C-07	0	566	-235.266	397.927	162.661	0.808696
TCGA-2Y-A9H3-01A-11R-A38B-07	1	22	-202.953	1792.41	1589.45	0.668727
TCGA-CC-5261-01A-01R-A131-07	NA	NA	50.5347	1123.3	1173.84	0.712815
TCGA-BC-A217-01A-11R-A155-07	0	1397	-1180.36	685.461	-494.899	0.861621
TCGA-MI-A75C-01A-11R-A32O-07	0	291	-1497.72	611.681	-886.042	0.889326
TCGA-DD-AAVY-01A-11R-A41C-07	0	1970	-1225.6	-315.669	-1541.27	0.929129
TCGA-DD-AADG-01A-11R-A41C-07	1	270	-1101.26	-435.733	-1536.99	0.928896
TCGA-2Y-A9H7-01A-11R-A39D-07	1	1117	-1227.82	309.81	-918.013	0.891462
TCGA-BW-A5NO-01A-11R-A27V-07	NA	NA	-743.863	508.361	-235.501	0.841675
TCGA-MR-A520-01A-11R-A266-07	NA	NA	-795.098	185.987	-609.11	0.870008
TCGA-FV-A3R2-01A-11R-A22L-07	0	194	-1135.54	115.853	-1019.68	0.898125
TCGA-DD-A1EG-01A-11R-A213-07	1	875	-55.0819	1390.73	1335.65	0.695956
TCGA-CC-A7IF-01A-11R-A33J-07	0	649	-1151.94	-374.849	-1526.79	0.928341
TCGA-DD-AADC-01A-11R-A41C-07	1	101	-1145.44	-136.75	-1282.19	0.914399
TCGA-EP-A2KA-01A-11R-A180-07	1	293	-830.793	1458.26	627.465	0.766712
TCGA-DD-A39Z-01A-11R-A213-07	0	601	-1428.31	-229.049	-1657.36	0.935294
TCGA-DD-AAE7-01A-11R-A41C-07	0	644	-263.936	871.955	608.019	0.768542
TCGA-YA-A8S7-01A-11R-A37K-07	1	398	98.8046	1810.67	1909.48	0.633076
TCGA-CC-5260-01A-01R-A131-07	NA	NA	37.9601	679.291	717.251	0.758185
TCGA-BC-A3KF-01A-11R-A213-07	0	8	-878.812	-110.937	-989.749	0.896184
TCGA-DD-AADI-01A-11R-A41C-07	0	1085	-229.428	1585.04	1355.61	0.693849
TCGA-DD-A3A5-01A-11R-A22L-07	1	84	-705.848	115.266	-590.583	0.868664
TCGA-FV-A3I1-01A-11R-A22L-07	0	247	-380.118	882.698	502.579	0.778352
TCGA-G3-A25U-01A-11R-A16W-07	0	1636	-1141.28	-245.176	-1386.46	0.920487
TCGA-DD-AADB-01A-11R-A41C-07	0	1242	-930.461	1228.37	297.912	0.796859
TCGA-G3-AAV1-01A-11R-A38B-07	1	49	-808.537	-59.9313	-868.468	0.888144
TCGA-G3-AAUZ-01A-11R-A38B-07	0	480	-430.058	1030.32	600.258	0.76927
TCGA-G3-AAV4-01A-11R-A38B-07	0	27	-977.499	-120.144	-1097.64	0.903098
TCGA-FV-A3R3-01A-11R-A22L-07	0	366	417.305	808.465	1225.77	0.707448
TCGA-2Y-A9H4-01A-11R-A38B-07	0	1452	-837.523	567.57	-269.952	0.844395
TCGA-CC-A3M9-01A-11R-A213-07	1	219	861.451	2873.21	3734.66	0.405572
TCGA-DD-A4NJ-01A-11R-A27V-07	1	549	-236.395	844.504	608.109	0.768533
TCGA-DD-AACH-01A-11R-A41C-07	1	83	-804.426	335.945	-468.481	0.859646
TCGA-CC-A8HT-01A-11R-A36F-07	1	83	-1111.89	808.163	-303.723	0.84704
TCGA-DD-AAEB-01A-11R-A41C-07	0	478	-831.229	372.481	-458.748	0.858915
TCGA-DD-A4NE-01A-11R-A27V-07	1	190	-768.446	-257.231	-1025.68	0.898512
TCGA-DD-A114-01A-11R-A131-07	0	1149	256.525	1824.54	2081.06	0.61338
TCGA-5C-AAPD-01A-21R-A39D-07	0	20	-307.449	1730.86	1423.41	0.686649
TCGA-DD-A1EA-01A-11R-A131-07	1	754	-957.168	711.366	-245.802	0.842491
TCGA-XR-A8TD-01A-12R-A39D-07	0	1030	372.805	1923.31	2296.12	0.588147
TCGA-ZS-A9CG-01A-11R-A37K-07	0	341	-784.666	78.3451	-706.32	0.876955
TCGA-2Y-A9H2-01A-12R-A38B-07	0	1731	-1042.26	570.281	-471.977	0.859908
TCGA-FV-A2QQ-01A-11R-A22L-07	0	729	-497.124	859.158	362.034	0.791138
TCGA-CC-A3MC-01A-11R-A22L-07	1	297	-590.679	314.927	-275.752	0.844851
TCGA-DD-AAE1-01A-11R-A41C-07	0	552	-1188.08	326.557	-861.52	0.887675
TCGA-DD-A4NN-01A-11R-A28V-07	1	166	-887.508	-439.676	-1327.18	0.917052
TCGA-DD-AACK-01A-11R-A41C-07	0	9	-1102.54	125.111	-977.425	0.89538
TCGA-G3-A5SK-01A-11R-A27V-07	1	483	-349.297	998.883	649.587	0.764624
TCGA-DD-A4NP-01A-11R-A28V-07	1	1286	-771.549	180.3	-591.249	0.868713
TCGA-DD-AADL-01A-11R-A41C-07	0	636	-1275.62	-356.877	-1632.5	0.933997
TCGA-4R-AA8I-01A-11R-A38B-07	1	158	-789.135	163.254	-625.881	0.87122
TCGA-KR-A7K8-01A-11R-A33J-07	0	906	-226.859	1629.49	1402.63	0.688863
TCGA-DD-A73A-01A-12R-A32O-07	0	728	-949.252	860.482	-88.7703	0.82985
TCGA-BC-A8YO-01A-11R-A37K-07	1	220	-956.009	1212.84	256.828	0.800488
TCGA-2Y-A9GY-01A-11R-A38B-07	1	637	-1007.68	1766.26	758.58	0.754215
TCGA-DD-AAVR-01A-11R-A41C-07	0	2513	360.266	1716.87	2077.14	0.613835
TCGA-DD-AAE6-01A-11R-A41C-07	1	105	-1665.88	-908.901	-2574.78	0.974337
TCGA-G3-A25T-01A-11R-A16W-07	1	452	-501.062	327.923	-173.139	0.836697
TCGA-BD-A3EP-01A-11R-A22L-07	0	409	140.133	1481.38	1621.51	0.665221
TCGA-FV-A23B-01A-11R-A16W-07	1	1453	-706.636	479.006	-227.63	0.841051
TCGA-DD-AACT-01A-11R-A41C-07	0	1562	-397.373	952.156	554.783	0.773518
TCGA-CC-A7IL-01A-11R-A33R-07	1	179	-1607.08	-492.656	-2099.73	0.956286
TCGA-G3-AAV7-01A-11R-A38B-07	0	361	-713.666	817.475	103.81	0.813748
TCGA-DD-A11D-01A-11R-A131-07	1	498	-695.096	20.6693	-674.427	0.874695
TCGA-CC-A9FU-01A-11R-A37K-07	0	0	-1636.45	-107.131	-1743.58	0.939698
TCGA-2Y-A9HB-01A-11R-A39D-07	0	260	-282.09	948.354	666.264	0.763044
TCGA-DD-AAC9-01A-11R-A41C-07	0	347	127.515	1125.5	1253.01	0.704616
TCGA-DD-AAVU-01A-11R-A41C-07	1	1630	-1241.14	-3.45844	-1244.6	0.912151
TCGA-DD-AAEK-01A-11R-A41C-07	0	1067	-213.694	1535.26	1321.57	0.697439
TCGA-CC-5258-01A-01R-A131-07	NA	NA	-599.192	613.18	13.9885	0.82134
TCGA-FV-A495-01A-11R-A266-07	0	1	21.6713	1323.65	1345.32	0.694937
TCGA-UB-A7MF-01A-11R-A33J-07	1	133	-660.988	1826.8	1165.82	0.71364
TCGA-CC-A7IK-01A-12R-A33R-07	1	150	-1358.02	-595.097	-1953.12	0.949771
TCGA-DD-AAED-01A-12R-A41C-07	1	198	-1586.31	156.068	-1430.24	0.922979
TCGA-CC-5262-01A-01R-A131-07	NA	NA	200.284	1177.62	1377.91	0.691489
TCGA-LG-A6GG-01A-11R-A311-07	0	387	-1138.03	-105.212	-1243.25	0.912069
TCGA-G3-A7M6-01A-11R-A33R-07	1	293	-686.813	250.601	-436.212	0.857217
TCGA-2Y-A9GV-01A-11R-A38B-07	0	2532	-163.43	890.929	727.5	0.757203
TCGA-DD-AACJ-01A-11R-A41C-07	1	100	-1311.49	-47.0489	-1358.54	0.918878
TCGA-DD-A3A2-01A-11R-A213-07	0	2131	-614.734	151.221	-463.513	0.859273
TCGA-ED-A97K-01A-21R-A38B-07	0	6	-386.42	518.455	132.035	0.811332
TCGA-CC-A5UD-01A-11R-A28V-07	1	182	-1212.35	-241.575	-1453.92	0.924312
TCGA-DD-AAE9-01A-11R-A41C-07	0	722	-1435.44	-3.38484	-1438.83	0.923464
TCGA-DD-AAC8-01A-11R-A41C-07	0	16	-970.83	401.052	-569.778	0.867147
TCGA-WJ-A86L-01A-12R-A39D-07	0	345	-1420.72	-171.038	-1591.76	0.931844
TCGA-DD-A4NF-01A-11R-A27V-07	1	656	-900.313	-447.58	-1347.89	0.91826
TCGA-DD-A1EB-01A-11R-A131-07	1	505	-626.92	89.9632	-536.957	0.864738
TCGA-GJ-A9DB-01A-11R-A37K-07	0	67	-251.217	342.838	91.6213	0.814786
TCGA-2Y-A9H9-01A-21R-A39D-07	1	59	-726.527	313.764	-412.763	0.855439
TCGA-DD-AAD5-01A-11R-A41C-07	1	130	-1012.93	825.415	-187.517	0.837851
TCGA-5R-AAAM-01A-12R-A41C-07	0	46	500.279	1105.16	1605.44	0.666981
TCGA-ED-A4XI-01A-11R-A266-07	0	819	169.094	1149.98	1319.07	0.697702
TCGA-BC-A10Y-01A-11R-A131-07	1	400	-885.92	431.423	-454.497	0.858596
TCGA-DD-A73E-01A-12R-A32O-07	0	44	-1221.86	-806.232	-2028.09	0.953158
TCGA-DD-AADK-01A-11R-A41C-07	0	1049	-240.923	788.765	547.842	0.774163
TCGA-EP-A2KB-01A-11R-A180-07	1	161	-1175.19	-43.9062	-1219.1	0.91061
TCGA-XR-A8TF-01A-11R-A36F-07	1	231	-1153.52	-131.962	-1285.48	0.914594
TCGA-DD-AADM-01A-11R-A41C-07	0	12	-627.932	511.372	-116.56	0.83212
TCGA-GJ-A6C0-01A-12R-A311-07	NA	NA	-594.722	1103.19	508.471	0.777809
TCGA-DD-A1EJ-01A-11R-A155-07	1	263	-1089.98	281.09	-808.891	0.884091
TCGA-2V-A95S-01A-11R-A37K-07	0	NA	-464.135	2187.99	1723.85	0.65393
TCGA-K7-AAU7-01A-11R-A38B-07	NA	NA	-301.385	650.866	349.481	0.792263
TCGA-DD-AAW0-01A-11R-A41C-07	0	2015	-39.2679	1089.3	1050.03	0.725442
TCGA-XR-A8TE-01A-11R-A36F-07	1	210	-572.728	-11.0594	-583.788	0.86817
TCGA-G3-A6UC-01A-21R-A33J-07	1	639	-1222.01	-299.09	-1521.1	0.92803
TCGA-BC-A112-01A-11R-A131-07	0	153	-308.571	474.911	166.34	0.808378
TCGA-ED-A459-01A-11R-A266-07	0	910	-909.769	540.468	-369.3	0.852118
TCGA-NI-A8LF-01A-11R-A36F-07	0	799	-421.618	46.9992	-374.618	0.852526
TCGA-BC-A5W4-01A-11R-A28V-07	NA	NA	-1510.01	-672.101	-2182.11	0.959752
TCGA-CC-A7IE-01A-21R-A38B-07	0	217	-703.825	1249.83	546.006	0.774334
TCGA-5R-AA1D-01A-11R-A38B-07	0	449	1184.88	1028.79	2213.67	0.597891
TCGA-CC-A7II-01A-11R-A33J-07	1	278	-811.961	-369.776	-1181.74	0.90833
TCGA-DD-A73C-01A-12R-A33J-07	1	566	-168.095	223.793	55.6972	0.817832
TCGA-KR-A7K7-01A-11R-A33J-07	1	239	-1161.14	1202.42	41.2794	0.819048
TCGA-DD-AAVP-01A-11R-A41C-07	1	903	-675.646	78.8789	-596.767	0.869114
TCGA-DD-AAD1-01A-11R-A41C-07	NA	NA	247.986	1364.46	1612.45	0.666214
TCGA-DD-AADS-01A-11R-A41C-07	0	474	-760.997	1426.36	665.365	0.763129
TCGA-DD-A3A1-01A-11R-A213-07	0	233	-1086.59	901.014	-185.576	0.837695
TCGA-RC-A7SB-01A-21R-A352-07	0	588	-1099.32	16.8618	-1082.46	0.902139
TCGA-DD-AAVZ-01A-11R-A41C-07	0	1900	-836.917	75.7187	-761.198	0.880798
TCGA-2Y-A9GT-01A-11R-A38B-07	1	1083	-204.609	1524.92	1320.31	0.697571
TCGA-DD-AADQ-01A-11R-A41C-07	0	436	-1222.64	530.056	-692.582	0.875984
TCGA-DD-A119-01A-11R-A131-07	NA	NA	-406.79	328.099	-78.6911	0.829024
TCGA-DD-A4NO-01A-11R-A28V-07	1	990	-402.153	153.021	-249.133	0.842754
TCGA-BW-A5NP-01A-11R-A27V-07	NA	NA	-1409.93	-567.351	-1977.28	0.950875
TCGA-DD-A4NA-01A-11R-A266-07	0	1008	-442.749	565.533	122.784	0.812126
TCGA-MI-A75E-01A-11R-A32O-07	0	507	-183.359	931.638	748.279	0.755207
TCGA-BC-A10Q-01A-11R-A131-07	NA	NA	-730.442	193.068	-537.374	0.864769
TCGA-DD-AAEE-01A-11R-A41C-07	1	224	-1024.23	-252.282	-1276.52	0.914061
TCGA-BC-A3KG-01A-11R-A213-07	1	209	-1339.24	-126.963	-1466.2	0.924998
TCGA-DD-A3A7-01A-11R-A22L-07	1	144	-1183.84	293.629	-890.208	0.889606
TCGA-CC-A8HV-01A-11R-A36F-07	1	149	-1293.1	-449.356	-1742.46	0.939642
TCGA-DD-AACN-01A-11R-A41C-07	1	357	-338.947	340.225	1.27818	0.822403
TCGA-G3-A25V-01A-11R-A16W-07	1	489	16.8276	1161.11	1177.94	0.712393
TCGA-DD-AAVS-01A-11R-A41C-07	0	1823	-726.174	195.474	-530.7	0.864276
TCGA-CC-A3MB-01A-11R-A213-07	0	315	-1014.46	11.0438	-1003.41	0.897072
TCGA-ZP-A9D0-01A-11R-A37K-07	0	1091	-774.63	-214.972	-989.603	0.896175
TCGA-DD-AAE2-01A-11R-A41C-07	0	638	-264.031	926.297	662.266	0.763423
TCGA-RG-A7D4-01A-12R-A33R-07	0	1098	-1154.33	1538.88	384.545	0.789112
TCGA-DD-A4NK-01A-11R-A28V-07	1	89	-765.805	-114.822	-880.627	0.888963
TCGA-DD-A39W-01A-11R-A213-07	0	827	-1038.15	-72.1218	-1110.27	0.903893
TCGA-DD-AADJ-01A-11R-A41C-07	0	1066	-1063.12	446.38	-616.74	0.87056
TCGA-DD-AACA-01A-11R-A41C-07	1	776	-1088.65	-255.839	-1344.49	0.918062
TCGA-CC-5263-01A-01R-A131-07	NA	NA	-847.686	627.147	-220.54	0.840487
TCGA-DD-A11C-01A-11R-A131-07	NA	NA	-136.658	452.435	315.777	0.795272
TCGA-DD-A4NL-01A-11R-A28V-07	0	1711	-253.079	394.877	141.798	0.810494
TCGA-HP-A5N0-01A-11R-A28V-07	1	179	145.58	553.615	699.196	0.75991
TCGA-ZP-A9D1-01A-11R-A38B-07	0	21	-233.69	636.418	402.728	0.78747
TCGA-ES-A2HS-01A-11R-A180-07	0	688	-545.085	-19.9664	-565.051	0.866802
TCGA-UB-AA0U-01A-11R-A38B-07	NA	NA	8.37085	748.956	757.327	0.754336
TCGA-DD-AAD3-01A-11R-A41C-07	0	1295	-7.399	702.88	695.481	0.760265
TCGA-BW-A5NQ-01A-11R-A27V-07	NA	NA	-859.886	1408.79	548.899	0.774065
TCGA-DD-A11B-01A-11R-A131-07	NA	NA	-922.613	-328.277	-1250.89	0.912529
TCGA-G3-A25Y-01A-11R-A16W-07	1	355	-215.857	583.337	367.48	0.790648
TCGA-CC-A7IH-01A-11R-A33J-07	0	365	-1022.56	-480.905	-1503.47	0.927063
TCGA-MR-A8JO-01A-12R-A36F-07	NA	NA	758.38	1462.89	2221.27	0.596997
TCGA-2Y-A9GX-01A-11R-A38B-07	NA	NA	715.417	1717.96	2433.38	0.571733
TCGA-DD-AACS-01A-11R-A41C-07	0	1804	-1284.66	-381.287	-1665.94	0.93574
TCGA-K7-A5RG-01A-11R-A28V-07	0	519	-257.947	2516.85	2258.9	0.592556
TCGA-DD-A1ED-01A-11R-A155-07	0	2301	-136.844	1132.59	995.745	0.730904
TCGA-DD-AADV-01A-11R-A39D-07	0	574	-470.538	159.476	-311.062	0.847612
TCGA-DD-AAD8-01A-11R-A41C-07	0	1219	-1027.51	110.257	-917.253	0.891412
TCGA-DD-A4NQ-01A-21R-A28V-07	1	126	-1010.63	618.874	-391.752	0.853838
TCGA-NI-A4U2-01A-11R-A28V-07	1	106	-515.025	172.087	-342.938	0.850086
TCGA-G3-AAV5-01A-11R-A37K-07	1	117	-1150.5	67.2839	-1083.22	0.902187
TCGA-G3-AAV2-01A-11R-A37K-07	0	372	-837.936	64.9713	-772.965	0.881614
TCGA-BC-A216-01A-11R-A155-07	0	1351	-1035.1	864.061	-171.041	0.836528
TCGA-DD-AAEA-01A-11R-A41C-07	0	575	-1070.59	700.332	-370.255	0.852191
TCGA-EP-A2KC-01A-11R-A213-07	0	19	-851.809	118.032	-733.778	0.878885
TCGA-RC-A6M5-01A-11R-A32O-07	NA	NA	328.112	200.148	528.259	0.77598
TCGA-2Y-A9GU-01A-11R-A38B-07	0	1939	-1058.96	-210.181	-1269.14	0.913622
TCGA-BC-A10T-01A-11R-A131-07	NA	NA	100.9	185.316	286.216	0.797896
TCGA-RC-A7SK-01A-11R-A352-07	1	312	-1206.78	-385.532	-1592.31	0.931873
TCGA-BC-A69H-01A-11R-A311-07	0	444	-869.075	915.595	46.5202	0.818606
TCGA-DD-AAVW-01A-11R-A41C-07	0	2317	210.925	812.512	1023.44	0.728124
TCGA-DD-AADO-01A-11R-A41C-07	0	453	-840.606	1459.19	618.583	0.767549
TCGA-ZS-A9CD-01A-11R-A37K-07	1	371	-296.953	652.528	355.574	0.791717
TCGA-DD-AACU-01A-11R-A41C-07	0	1567	-739.494	419.425	-320.068	0.848313
TCGA-G3-A7M5-01A-11R-A33R-07	0	447	-1004.63	353.205	-651.424	0.873054
TCGA-WQ-A9G7-01A-11R-A37K-07	0	30	-1336	-296.835	-1632.83	0.934014
TCGA-G3-A5SJ-01A-11R-A27V-07	1	308	-642.024	1246.16	604.14	0.768906
TCGA-O8-A75V-01A-11R-A32O-07	NA	NA	-266.604	1182.33	915.725	0.73887
TCGA-ED-A5KG-01A-11R-A27V-07	0	854	534.161	3210.43	3744.6	0.404238
TCGA-CC-A8HU-01A-11R-A36F-07	1	301	-1239.86	-254.868	-1494.73	0.926581
TCGA-DD-AACV-01A-11R-A41C-07	1	344	-1451.21	-753.183	-2204.39	0.960665
TCGA-CC-A8HS-01A-11R-A36F-07	1	201	-1214.43	-428.692	-1643.12	0.934553
TCGA-CC-A123-01A-11R-A131-07	NA	NA	-911.217	351.449	-559.768	0.866415
TCGA-DD-A3A9-01A-11R-A266-07	NA	NA	-93.1589	861.606	768.447	0.753264
TCGA-DD-A4ND-01A-11R-A266-07	0	2746	606.159	1158.07	1764.23	0.649434
TCGA-ZP-A9CV-01A-11R-A38B-07	NA	NA	-197.697	942.835	745.138	0.75551
TCGA-ED-A7XO-01A-11R-A352-07	1	262	-192.957	786.467	593.511	0.769903
TCGA-ZP-A9D2-01A-11R-A38B-07	1	315	-562.036	227.712	-334.325	0.849419
TCGA-2Y-A9GZ-01A-11R-A39D-07	1	719	-1050.22	-420.713	-1470.93	0.925262
TCGA-DD-A11A-01A-11R-A131-07	0	79	-1112.99	-225.475	-1338.46	0.917711
TCGA-LG-A9QC-01A-11R-A37K-07	0	425	-996.093	-415.401	-1411.49	0.921917
TCGA-DD-A4NV-01A-11R-A311-07	0	2398	-259.465	231.164	-28.3011	0.824865
TCGA-CC-A7IG-01A-11R-A33J-07	1	195	-995.92	455.826	-540.094	0.864969
TCGA-DD-AADR-01A-11R-A41C-07	1	1700	-871.713	545.697	-326.017	0.848775
TCGA-BC-A110-01A-11R-A131-07	1	2057	628.231	1583.76	2211.99	0.598089
TCGA-DD-A118-01A-11R-A131-07	1	658	-397.932	24.4191	-373.513	0.852441
TCGA-UB-A7ME-01A-11R-A33J-07	0	486	-458.324	1191.48	733.156	0.756661
TCGA-DD-A4NI-01A-11R-A27V-07	0	816	-174.905	1026.32	851.419	0.745197
TCGA-G3-A3CI-01A-11R-A213-07	0	180	-388.656	959.738	571.082	0.772
TCGA-DD-AACY-01A-11R-A41C-07	1	776	-797.703	308.296	-489.407	0.861211
TCGA-2Y-A9H5-01A-11R-A38B-07	1	258	-342.667	257.081	-85.5862	0.82959
TCGA-ZS-A9CF-01A-11R-A38B-07	1	636	-907.516	378.119	-529.397	0.86418
TCGA-RC-A6M6-01A-11R-A32O-07	NA	NA	-1456.23	-35.3466	-1491.58	0.926407
TCGA-XR-A8TC-01A-11R-A36F-07	0	1339	-852.986	-245.969	-1098.95	0.903181
TCGA-RC-A7SF-01A-11R-A352-07	1	502	-1020.15	298.727	-721.423	0.878018
TCGA-CC-A7IJ-01A-11R-A33R-07	0	382	818.748	1950.73	2769.47	0.530578
TCGA-DD-A1EL-01A-11R-A155-07	NA	NA	-1359.48	201.455	-1158.03	0.906869
TCGA-BC-A10Z-01A-11R-A131-07	0	34	-1538.51	-767.421	-2305.93	0.964697
TCGA-G3-A5SM-01A-12R-A28V-07	1	252	43.6836	987.145	1030.83	0.727379
TCGA-DD-AAVQ-01A-11R-A41C-07	1	1509	-344.132	2030.7	1686.57	0.658061
TCGA-CC-5259-01A-31R-A213-07	1	180	-1365.9	574.587	-791.312	0.882882
TCGA-DD-AAE4-01A-11R-A41C-07	1	111	-2.04641	1777.08	1775.03	0.648228
TCGA-DD-AACL-01A-11R-A41C-07	0	107	-548.012	1789.2	1241.19	0.705846
TCGA-DD-AADW-01A-11R-A39D-07	1	386	-573.82	-393.678	-967.498	0.89473
TCGA-DD-A39Y-01A-11R-A213-07	0	171	-1249.02	-4.87534	-1253.89	0.912709
TCGA-ED-A7PZ-01A-11R-A33R-07	0	6	-1543.62	-553.583	-2097.2	0.956177
TCGA-DD-AAD6-01A-11R-A41C-07	1	50	-1499.83	39.1827	-1460.65	0.924688
TCGA-RC-A6M4-01A-11R-A32O-07	NA	NA	-1319.35	-680.225	-1999.58	0.951883
TCGA-KR-A7K0-01A-12R-A33R-07	0	65	-574.175	287.507	-286.668	0.845707
TCGA-DD-A73D-01A-12R-A32O-07	1	592	-1584.47	-689.94	-2274.41	0.963469
TCGA-DD-AADU-01A-11R-A41C-07	0	554	-1330.84	-21.7792	-1352.62	0.918535
TCGA-G3-A3CJ-01A-11R-A213-07	1	296	-862.894	230.06	-632.834	0.87172
TCGA-DD-A1EI-01A-11R-A131-07	0	183	-28.2468	508.781	480.534	0.780379
TCGA-DD-A4NS-01A-11R-A311-07	1	893	576.259	1239.75	1816.01	0.643636
TCGA-ED-A7PX-01A-51R-A352-07	0	6	9.77022	370.921	380.691	0.78946
TCGA-BD-A3ER-01A-11R-A213-07	1	226	59.262	599.575	658.837	0.763748
TCGA-2Y-A9H0-01A-11R-A38B-07	0	3675	-1129.92	796.38	-333.537	0.849358
TCGA-DD-AACP-01A-11R-A41C-07	0	415	-1683.34	-319.457	-2002.8	0.952028
TCGA-2Y-A9GS-01A-12R-A38B-07	1	102	-573.327	619.086	45.7587	0.818671
TCGA-5R-AA1C-01A-11R-A41C-07	0	520	-863.554	331.589	-531.966	0.86437
TCGA-DD-AACE-01A-11R-A41C-07	1	1279	-770.353	-90.173	-860.526	0.887607
TCGA-WX-AA44-01A-11R-A39D-07	NA	NA	-973.423	366.419	-607.004	0.869856
TCGA-ED-A7XP-01A-11R-A352-07	1	187	-388.861	490.049	101.188	0.813971
TCGA-DD-A1EC-01A-21R-A131-07	1	299	-228.872	2452.51	2223.64	0.596718
TCGA-DD-AAVV-01A-11R-A41C-07	0	2455	34.7348	1461.03	1495.76	0.678889
TCGA-2Y-A9H8-01A-11R-A39D-07	1	398	-975.412	917.843	-57.569	0.827286
TCGA-RC-A7SH-01A-11R-A38B-07	1	91	-1304.3	-430.461	-1734.76	0.939254
TCGA-ZS-A9CE-01A-11R-A37K-07	0	1241	-1253.94	-540.113	-1794.05	0.942206
TCGA-BC-A10U-01A-11R-A131-07	NA	NA	-1311.32	38.3043	-1273.02	0.913853
TCGA-ZP-A9CZ-01A-11R-A38B-07	0	706	-284.793	1149.05	864.259	0.743939
TCGA-DD-AAW2-01A-11R-A41C-07	1	391	-862.798	-268.061	-1130.86	0.905181
TCGA-G3-A25X-01A-11R-A16W-07	0	1779	-131.135	1496.43	1365.29	0.692825
TCGA-DD-AADA-01A-11R-A41C-07	0	1233	-335.41	1043.55	708.142	0.759056
TCGA-DD-AACD-01A-11R-A41C-07	1	151	-439.492	1053.12	613.629	0.768015
TCGA-G3-AAV3-01A-11R-A37K-07	0	412	-364.964	1376.59	1011.63	0.72931
TCGA-G3-A3CH-01A-11R-A22L-07	1	116	-474.939	583.876	108.938	0.81331
TCGA-G3-A3CK-01A-11R-A213-07	0	585	-751.53	706.088	-45.4429	0.826285
TCGA-5C-A9VG-01A-11R-A37K-07	0	328	-454.059	-330.404	-784.463	0.88241
TCGA-G3-A7M8-01A-11R-A33R-07	NA	NA	-329.421	280.809	-48.6125	0.826547
TCGA-DD-A4NR-01A-11R-A311-07	0	9	125.97	2330.72	2456.69	0.568922
TCGA-FV-A4ZP-01A-12R-A266-07	NA	NA	-793.322	1223.48	430.162	0.784982
TCGA-UB-AA0V-01A-11R-A38B-07	0	314	104.647	607.332	711.98	0.758689
TCGA-DD-A116-01A-11R-A131-07	1	828	-685.773	433.555	-252.217	0.842998
TCGA-DD-A1EH-01A-11R-A131-07	1	120	-522.853	-121.763	-644.616	0.872566
TCGA-CC-A9FS-01A-11R-A37K-07	0	211	-1002.63	2.01921	-1000.61	0.89689
TCGA-DD-A1EK-01A-11R-A213-07	NA	NA	-409.747	799	389.253	0.788688
TCGA-CC-A3MA-01A-11R-A213-07	1	261	-509.908	-115.781	-625.688	0.871206
TCGA-DD-A4NH-01A-11R-A27V-07	1	161	-666.359	921.822	255.463	0.800609
TCGA-PD-A5DF-01A-11R-A27V-07	NA	NA	130.354	884.094	1014.45	0.729027
TCGA-UB-A7MD-01A-12R-A352-07	0	52	-294.65	932.213	637.563	0.76576
TCGA-BC-A69I-01A-11R-A311-07	0	387	-310.186	463.845	153.658	0.809473
TCGA-FV-A2QR-01A-11R-A213-07	NA	NA	-268.359	186.77	-81.5898	0.829262
TCGA-DD-AACC-01A-11R-A41C-07	1	537	87.3614	2643.14	2730.5	0.535418
TCGA-WX-AA47-01A-11R-A39D-07	1	103	-1442.32	-442.977	-1885.3	0.946609
TCGA-MI-A75I-01A-11R-A32O-07	1	265	-1212.51	187.732	-1024.78	0.898454
TCGA-ED-A8O6-01A-11R-A36F-07	0	56	-991.686	-11.4781	-1003.16	0.897056
TCGA-CC-A1HT-01A-11R-A131-07	NA	NA	115.341	2125.9	2241.24	0.594643
TCGA-HP-A5MZ-01A-21R-A27V-07	0	91	593.878	1557.75	2151.63	0.605167
TCGA-DD-A113-01A-11R-A131-07	1	1676	-776.531	488.343	-288.187	0.845826
TCGA-DD-A3A8-01A-11R-A22L-07	0	11	-1162.38	-194.793	-1357.17	0.918799
TCGA-DD-AADP-01A-11R-A39D-07	0	458	-567.358	361.343	-206.014	0.83933
TCGA-DD-A73G-01A-22R-A32O-07	0	3478	-758.44	600.46	-157.98	0.835476
TCGA-G3-A7M7-01A-12R-A352-07	0	361	-845.955	-80.8107	-926.765	0.892044
TCGA-CC-A5UE-01A-11R-A28V-07	1	175	-1572.56	-29.6869	-1602.25	0.932401
TCGA-DD-AACX-01A-11R-A41C-07	1	42	-1320.19	173.64	-1146.55	0.906158
TCGA-DD-AADD-01A-11R-A41C-07	0	1231	-1538.47	-118.34	-1656.81	0.935266
TCGA-DD-A73F-01A-11R-A32O-07	0	1085	-201.395	1808.4	1607.01	0.66681
TCGA-CC-A9FW-01A-11R-A37K-07	1	153	-1393.06	144.868	-1248.19	0.912367
TCGA-BC-A10R-01A-11R-A131-07	1	199	-128.863	-10.6964	-139.559	0.833987
TCGA-ES-A2HT-01A-12R-A180-07	0	438	-260.396	715.781	455.385	0.782682
TCGA-DD-A3A4-01A-11R-A22L-07	1	87	-925.35	-485.645	-1410.99	0.921889
TCGA-WX-AA46-01A-11R-A39D-07	0	756	-330.531	422.926	92.3952	0.81472
TCGA-DD-A1EE-01A-11R-A131-07	1	44	-1084.53	-255.333	-1339.86	0.917793
TCGA-FV-A4ZQ-01A-11R-A266-07	0	12	-1026.98	1773.93	746.949	0.755335

## Sheet: PFI
ID	PFI	PFI.time	StromalScore	ImmuneScore	ESTIMATEScore	TumorPurity
TCGA-GJ-A3OU-01A-31R-A38B-07	1	879	907.54	2645.77	3553.31	0.429757
TCGA-G3-A7M9-01A-23R-A352-07	0	56	-1407.2	-375.777	-1782.98	0.94166
TCGA-ED-A627-01A-12R-A311-07	0	423	722.498	1937.92	2660.42	0.544079
TCGA-DD-AACB-01A-11R-A41C-07	0	2324	-738.201	1433.5	695.299	0.760282
TCGA-CC-5264-01A-01R-A131-07	0	102	-1046.94	62.5018	-984.433	0.895838
TCGA-DD-AAW3-01A-11R-A41C-07	0	1633	-969.019	-338.064	-1307.08	0.915872
TCGA-DD-AA3A-01A-11R-A37K-07	0	410	-1530.18	-65.196	-1595.37	0.932036
TCGA-DD-AAEI-01A-11R-A41C-07	1	491	-693.16	738.771	45.6115	0.818683
TCGA-DD-AADF-01A-11R-A41C-07	0	115	-1213.02	283.706	-929.31	0.892213
TCGA-UB-A7MA-01A-11R-A33R-07	1	221	-868.261	-52.3357	-920.597	0.891634
TCGA-EP-A3JL-01A-11R-A213-07	0	303	-40.0571	1357.69	1317.63	0.697853
TCGA-DD-AACZ-01A-11R-A41C-07	1	88	-500.886	2079.5	1578.61	0.66991
TCGA-2Y-A9HA-01A-11R-A39D-07	1	36	-1062.88	-67.23	-1130.11	0.905135
TCGA-ED-A82E-01A-11R-A352-07	0	408	-420.357	240.733	-179.624	0.837218
TCGA-ED-A66Y-01A-11R-A311-07	0	296	-1274.17	-870.173	-2144.34	0.95818
TCGA-DD-AACF-01A-11R-A41C-07	1	119	-1051.56	691.312	-360.247	0.851421
TCGA-MI-A75G-01A-11R-A32O-07	0	698	-1144.34	-312.571	-1456.91	0.924479
TCGA-DD-AAEG-01A-11R-A39D-07	0	719	-1046.88	-257.324	-1304.2	0.915702
TCGA-DD-AAD2-01A-11R-A41C-07	0	658	255.901	1009.59	1265.49	0.703315
TCGA-UB-A7MB-01A-11R-A33R-07	1	48	-1302.51	-495.302	-1797.81	0.942391
TCGA-DD-AACQ-01A-11R-A41C-07	1	105	-1535.37	-575.324	-2110.69	0.956755
TCGA-2Y-A9GW-01A-11R-A38B-07	1	1229	0.373676	1490.52	1490.9	0.679413
TCGA-G3-A3CG-01A-11R-A213-07	1	329	-464.594	437.335	-27.2592	0.824779
TCGA-DD-AAEH-01A-11R-A41C-07	1	644	-234.011	1490.23	1256.21	0.704282
TCGA-G3-A5SI-01A-31R-A27V-07	1	348	-1098.79	-523.281	-1622.07	0.933449
TCGA-KR-A7K2-01A-12R-A33R-07	0	829	-430.133	583.191	153.058	0.809525
TCGA-RC-A6M3-01A-11R-A32O-07	0	0	-1455.43	234.518	-1220.92	0.910721
TCGA-EP-A3RK-01A-11R-A22L-07	1	320	-146.059	1781.09	1635.03	0.663738
TCGA-UB-A7MC-01A-11R-A33R-07	1	359	-1385.7	-506.966	-1892.66	0.946957
TCGA-MI-A75H-01A-11R-A32O-07	1	301	-576.347	1051.68	475.329	0.780857
TCGA-DD-AADY-01A-11R-A41C-07	0	555	-707	-426.439	-1133.44	0.905342
TCGA-BC-A10W-01A-11R-A131-07	1	91	-668.048	475.215	-192.834	0.838277
TCGA-DD-AADN-01A-11R-A41C-07	0	898	-1169.21	2017.54	848.325	0.7455
TCGA-DD-AAVX-01A-11R-A41C-07	1	393	-529.832	964.954	435.122	0.78453
TCGA-QA-A7B7-01A-11R-A32O-07	1	88	-1373.3	-70.1592	-1443.46	0.923724
TCGA-G3-A25Z-01A-11R-A16W-07	0	655	-509.499	427.947	-81.5521	0.829259
TCGA-DD-A39V-01A-11R-A213-07	1	455	-445.989	1388.62	942.633	0.736202
TCGA-5C-A9VH-01A-11R-A37K-07	0	322	-321.223	43.1866	-278.036	0.84503
TCGA-ZP-A9D4-01A-11R-A37K-07	0	395	-1015.84	-241.483	-1257.33	0.912915
TCGA-G3-AAV6-01A-21R-A37K-07	1	44	-1136.52	-349.989	-1486.5	0.926126
TCGA-DD-A4NG-01A-11R-A27V-07	1	430	-888.455	461.926	-426.529	0.856484
TCGA-BC-A10X-01A-11R-A131-07	0	770	330.615	859.368	1189.98	0.711151
TCGA-DD-A1EF-01A-11R-A131-07	1	394	-682.192	603.686	-78.5055	0.829009
TCGA-G3-A5SL-01A-11R-A27V-07	0	621	-717.057	-74.173	-791.23	0.882876
TCGA-EP-A12J-01A-11R-A131-07	0	570	-908.701	21.9141	-886.787	0.889376
TCGA-T1-A6J8-01A-11R-A32O-07	0	23	-556.833	179.683	-377.149	0.85272
TCGA-G3-AAV0-01A-11R-A37K-07	0	476	-861.232	218.41	-642.822	0.872438
TCGA-CC-A9FV-01A-11R-A37K-07	0	0	1042.89	2269.13	3312.02	0.461463
TCGA-XR-A8TG-01A-11R-A36F-07	1	350	-528.65	271.888	-256.762	0.843356
TCGA-ED-A8O5-01A-11R-A36F-07	0	406	-759.107	-213.478	-972.585	0.895063
TCGA-DD-AACO-01A-11R-A41C-07	1	479	-542.343	916.964	374.62	0.790006
TCGA-DD-A3A3-01A-11R-A22L-07	0	535	-1415.87	272.634	-1143.23	0.905952
TCGA-2Y-A9H6-01A-11R-A39D-07	0	357	-47.5923	1070.62	1023.03	0.728164
TCGA-LG-A9QD-01A-11R-A38B-07	0	366	-825.823	487.403	-338.421	0.849737
TCGA-FV-A496-01A-11R-A266-07	0	10	-1361.86	-601.55	-1963.41	0.950243
TCGA-DD-AAE0-01A-11R-A41C-07	0	555	-704.62	34.2492	-670.371	0.874407
TCGA-DD-AACI-01A-11R-A41C-07	1	1432	-210.613	1875.8	1665.18	0.660421
TCGA-DD-AAD0-01A-11R-A41C-07	1	47	-1483.26	-266.776	-1750.04	0.940022
TCGA-WQ-AB4B-01A-11R-A41C-07	1	273	-310.83	616.511	305.681	0.79617
TCGA-DD-AACW-01A-11R-A41C-07	0	1424	-1157.06	152.497	-1004.56	0.897147
TCGA-BD-A2L6-01A-11R-A213-07	1	415	-729.164	397.407	-331.757	0.84922
TCGA-DD-A3A6-01A-11R-A22L-07	0	3258	635.761	1292.63	1928.39	0.630925
TCGA-DD-AAW1-01A-11R-A41C-07	0	1989	-984.081	-163.034	-1147.12	0.906193
TCGA-FV-A3I0-01A-11R-A22L-07	1	159	-495.208	337.778	-157.431	0.835432
TCGA-DD-A39X-01A-11R-A213-07	1	1032	-486.46	546.631	60.1712	0.817454
TCGA-3K-AAZ8-01A-12R-A39D-07	1	151	-1083.62	421.92	-661.702	0.873789
TCGA-K7-A5RF-01A-11R-A28V-07	1	205	270.262	1353.12	1623.39	0.665016
TCGA-DD-A115-01A-11R-A131-07	1	469	-374.76	442.374	67.6132	0.816824
TCGA-ED-A7PY-01A-11R-A33R-07	0	390	-1377.19	-271.184	-1648.38	0.934827
TCGA-ED-A66X-01A-11R-A311-07	1	124	311	923.775	1234.77	0.706513
TCGA-ZP-A9CY-01A-11R-A38B-07	0	782	-126.423	620.683	494.26	0.779118
TCGA-DD-AACG-01A-11R-A41C-07	1	125	-1260.11	764.891	-495.222	0.861645
TCGA-DD-A73B-01A-12R-A32O-07	1	240	-1209.1	-386.648	-1595.75	0.932056
TCGA-RC-A7S9-01A-11R-A33R-07	0	640	-1240.62	525.255	-715.37	0.877593
TCGA-BC-A10S-01A-22R-A131-07	1	1130	-4.02593	1160.81	1156.78	0.714568
TCGA-DD-A4NB-01A-12R-A266-07	1	912	1003.19	881.006	1884.19	0.635944
TCGA-CC-A5UC-01A-11R-A28V-07	1	312	-304.271	386.723	82.4518	0.815566
TCGA-EP-A26S-01A-11R-A16W-07	0	608	-952.665	-326.428	-1279.09	0.914214
TCGA-K7-A6G5-01A-11R-A311-07	0	512	-403.983	845.26	441.277	0.78397
TCGA-2Y-A9H1-01A-11R-A38B-07	1	321	-914.584	1125.72	211.131	0.804491
TCGA-G3-A25S-01A-11R-A16W-07	1	37	-1084.4	640.699	-443.699	0.857782
TCGA-DD-AAE3-01A-11R-A41C-07	0	566	-235.266	397.927	162.661	0.808696
TCGA-2Y-A9H3-01A-11R-A38B-07	1	22	-202.953	1792.41	1589.45	0.668727
TCGA-CC-5261-01A-01R-A131-07	0	97	50.5347	1123.3	1173.84	0.712815
TCGA-BC-A217-01A-11R-A155-07	0	1397	-1180.36	685.461	-494.899	0.861621
TCGA-MI-A75C-01A-11R-A32O-07	0	291	-1497.72	611.681	-886.042	0.889326
TCGA-DD-AAVY-01A-11R-A41C-07	0	1970	-1225.6	-315.669	-1541.27	0.929129
TCGA-DD-AADG-01A-11R-A41C-07	1	270	-1101.26	-435.733	-1536.99	0.928896
TCGA-2Y-A9H7-01A-11R-A39D-07	1	1117	-1227.82	309.81	-918.013	0.891462
TCGA-BW-A5NO-01A-11R-A27V-07	0	20	-743.863	508.361	-235.501	0.841675
TCGA-MR-A520-01A-11R-A266-07	0	229	-795.098	185.987	-609.11	0.870008
TCGA-FV-A3R2-01A-11R-A22L-07	0	194	-1135.54	115.853	-1019.68	0.898125
TCGA-DD-A1EG-01A-11R-A213-07	1	875	-55.0819	1390.73	1335.65	0.695956
TCGA-CC-A7IF-01A-11R-A33J-07	1	254	-1151.94	-374.849	-1526.79	0.928341
TCGA-DD-AADC-01A-11R-A41C-07	1	101	-1145.44	-136.75	-1282.19	0.914399
TCGA-EP-A2KA-01A-11R-A180-07	1	293	-830.793	1458.26	627.465	0.766712
TCGA-DD-A39Z-01A-11R-A213-07	0	601	-1428.31	-229.049	-1657.36	0.935294
TCGA-DD-AAE7-01A-11R-A41C-07	0	644	-263.936	871.955	608.019	0.768542
TCGA-YA-A8S7-01A-11R-A37K-07	1	398	98.8046	1810.67	1909.48	0.633076
TCGA-CC-5260-01A-01R-A131-07	0	87	37.9601	679.291	717.251	0.758185
TCGA-BC-A3KF-01A-11R-A213-07	0	8	-878.812	-110.937	-989.749	0.896184
TCGA-DD-AADI-01A-11R-A41C-07	0	1085	-229.428	1585.04	1355.61	0.693849
TCGA-DD-A3A5-01A-11R-A22L-07	1	84	-705.848	115.266	-590.583	0.868664
TCGA-FV-A3I1-01A-11R-A22L-07	0	247	-380.118	882.698	502.579	0.778352
TCGA-G3-A25U-01A-11R-A16W-07	0	1636	-1141.28	-245.176	-1386.46	0.920487
TCGA-DD-AADB-01A-11R-A41C-07	0	1242	-930.461	1228.37	297.912	0.796859
TCGA-G3-AAV1-01A-11R-A38B-07	1	49	-808.537	-59.9313	-868.468	0.888144
TCGA-G3-AAUZ-01A-11R-A38B-07	0	480	-430.058	1030.32	600.258	0.76927
TCGA-G3-AAV4-01A-11R-A38B-07	0	27	-977.499	-120.144	-1097.64	0.903098
TCGA-FV-A3R3-01A-11R-A22L-07	0	366	417.305	808.465	1225.77	0.707448
TCGA-2Y-A9H4-01A-11R-A38B-07	0	1452	-837.523	567.57	-269.952	0.844395
TCGA-CC-A3M9-01A-11R-A213-07	1	219	861.451	2873.21	3734.66	0.405572
TCGA-DD-A4NJ-01A-11R-A27V-07	1	549	-236.395	844.504	608.109	0.768533
TCGA-DD-AACH-01A-11R-A41C-07	1	83	-804.426	335.945	-468.481	0.859646
TCGA-CC-A8HT-01A-11R-A36F-07	1	83	-1111.89	808.163	-303.723	0.84704
TCGA-DD-AAEB-01A-11R-A41C-07	0	478	-831.229	372.481	-458.748	0.858915
TCGA-DD-A4NE-01A-11R-A27V-07	1	190	-768.446	-257.231	-1025.68	0.898512
TCGA-DD-A114-01A-11R-A131-07	0	1149	256.525	1824.54	2081.06	0.61338
TCGA-5C-AAPD-01A-21R-A39D-07	0	20	-307.449	1730.86	1423.41	0.686649
TCGA-DD-A1EA-01A-11R-A131-07	1	754	-957.168	711.366	-245.802	0.842491
TCGA-XR-A8TD-01A-12R-A39D-07	0	1030	372.805	1923.31	2296.12	0.588147
TCGA-ZS-A9CG-01A-11R-A37K-07	0	341	-784.666	78.3451	-706.32	0.876955
TCGA-2Y-A9H2-01A-12R-A38B-07	0	1731	-1042.26	570.281	-471.977	0.859908
TCGA-FV-A2QQ-01A-11R-A22L-07	0	729	-497.124	859.158	362.034	0.791138
TCGA-CC-A3MC-01A-11R-A22L-07	1	297	-590.679	314.927	-275.752	0.844851
TCGA-DD-AAE1-01A-11R-A41C-07	0	552	-1188.08	326.557	-861.52	0.887675
TCGA-DD-A4NN-01A-11R-A28V-07	1	166	-887.508	-439.676	-1327.18	0.917052
TCGA-DD-AACK-01A-11R-A41C-07	0	9	-1102.54	125.111	-977.425	0.89538
TCGA-G3-A5SK-01A-11R-A27V-07	1	483	-349.297	998.883	649.587	0.764624
TCGA-DD-A4NP-01A-11R-A28V-07	1	1286	-771.549	180.3	-591.249	0.868713
TCGA-DD-AADL-01A-11R-A41C-07	0	636	-1275.62	-356.877	-1632.5	0.933997
TCGA-4R-AA8I-01A-11R-A38B-07	1	158	-789.135	163.254	-625.881	0.87122
TCGA-KR-A7K8-01A-11R-A33J-07	0	906	-226.859	1629.49	1402.63	0.688863
TCGA-DD-A73A-01A-12R-A32O-07	0	728	-949.252	860.482	-88.7703	0.82985
TCGA-BC-A8YO-01A-11R-A37K-07	1	220	-956.009	1212.84	256.828	0.800488
TCGA-2Y-A9GY-01A-11R-A38B-07	1	637	-1007.68	1766.26	758.58	0.754215
TCGA-DD-AAVR-01A-11R-A41C-07	0	2513	360.266	1716.87	2077.14	0.613835
TCGA-DD-AAE6-01A-11R-A41C-07	1	105	-1665.88	-908.901	-2574.78	0.974337
TCGA-G3-A25T-01A-11R-A16W-07	1	452	-501.062	327.923	-173.139	0.836697
TCGA-BD-A3EP-01A-11R-A22L-07	0	409	140.133	1481.38	1621.51	0.665221
TCGA-FV-A23B-01A-11R-A16W-07	1	1453	-706.636	479.006	-227.63	0.841051
TCGA-DD-AACT-01A-11R-A41C-07	0	1562	-397.373	952.156	554.783	0.773518
TCGA-CC-A7IL-01A-11R-A33R-07	1	179	-1607.08	-492.656	-2099.73	0.956286
TCGA-G3-AAV7-01A-11R-A38B-07	0	361	-713.666	817.475	103.81	0.813748
TCGA-DD-A11D-01A-11R-A131-07	1	498	-695.096	20.6693	-674.427	0.874695
TCGA-CC-A9FU-01A-11R-A37K-07	0	0	-1636.45	-107.131	-1743.58	0.939698
TCGA-2Y-A9HB-01A-11R-A39D-07	0	260	-282.09	948.354	666.264	0.763044
TCGA-DD-AAC9-01A-11R-A41C-07	0	347	127.515	1125.5	1253.01	0.704616
TCGA-DD-AAVU-01A-11R-A41C-07	1	1630	-1241.14	-3.45844	-1244.6	0.912151
TCGA-DD-AAEK-01A-11R-A41C-07	0	1067	-213.694	1535.26	1321.57	0.697439
TCGA-CC-5258-01A-01R-A131-07	0	129	-599.192	613.18	13.9885	0.82134
TCGA-FV-A495-01A-11R-A266-07	0	1	21.6713	1323.65	1345.32	0.694937
TCGA-UB-A7MF-01A-11R-A33J-07	1	133	-660.988	1826.8	1165.82	0.71364
TCGA-CC-A7IK-01A-12R-A33R-07	1	150	-1358.02	-595.097	-1953.12	0.949771
TCGA-DD-AAED-01A-12R-A41C-07	1	198	-1586.31	156.068	-1430.24	0.922979
TCGA-CC-5262-01A-01R-A131-07	0	103	200.284	1177.62	1377.91	0.691489
TCGA-LG-A6GG-01A-11R-A311-07	0	387	-1138.03	-105.212	-1243.25	0.912069
TCGA-G3-A7M6-01A-11R-A33R-07	1	293	-686.813	250.601	-436.212	0.857217
TCGA-2Y-A9GV-01A-11R-A38B-07	1	1745	-163.43	890.929	727.5	0.757203
TCGA-DD-AACJ-01A-11R-A41C-07	1	100	-1311.49	-47.0489	-1358.54	0.918878
TCGA-DD-A3A2-01A-11R-A213-07	0	2131	-614.734	151.221	-463.513	0.859273
TCGA-ED-A97K-01A-21R-A38B-07	0	6	-386.42	518.455	132.035	0.811332
TCGA-CC-A5UD-01A-11R-A28V-07	1	182	-1212.35	-241.575	-1453.92	0.924312
TCGA-DD-AAE9-01A-11R-A41C-07	0	722	-1435.44	-3.38484	-1438.83	0.923464
TCGA-DD-AAC8-01A-11R-A41C-07	0	16	-970.83	401.052	-569.778	0.867147
TCGA-WJ-A86L-01A-12R-A39D-07	0	345	-1420.72	-171.038	-1591.76	0.931844
TCGA-DD-A4NF-01A-11R-A27V-07	1	656	-900.313	-447.58	-1347.89	0.91826
TCGA-DD-A1EB-01A-11R-A131-07	1	505	-626.92	89.9632	-536.957	0.864738
TCGA-GJ-A9DB-01A-11R-A37K-07	0	67	-251.217	342.838	91.6213	0.814786
TCGA-2Y-A9H9-01A-21R-A39D-07	1	59	-726.527	313.764	-412.763	0.855439
TCGA-DD-AAD5-01A-11R-A41C-07	1	130	-1012.93	825.415	-187.517	0.837851
TCGA-5R-AAAM-01A-12R-A41C-07	0	46	500.279	1105.16	1605.44	0.666981
TCGA-ED-A4XI-01A-11R-A266-07	0	819	169.094	1149.98	1319.07	0.697702
TCGA-BC-A10Y-01A-11R-A131-07	1	400	-885.92	431.423	-454.497	0.858596
TCGA-DD-A73E-01A-12R-A32O-07	0	44	-1221.86	-806.232	-2028.09	0.953158
TCGA-DD-AADK-01A-11R-A41C-07	0	1049	-240.923	788.765	547.842	0.774163
TCGA-EP-A2KB-01A-11R-A180-07	1	161	-1175.19	-43.9062	-1219.1	0.91061
TCGA-XR-A8TF-01A-11R-A36F-07	1	231	-1153.52	-131.962	-1285.48	0.914594
TCGA-DD-AADM-01A-11R-A41C-07	0	12	-627.932	511.372	-116.56	0.83212
TCGA-GJ-A6C0-01A-12R-A311-07	0	31	-594.722	1103.19	508.471	0.777809
TCGA-DD-A1EJ-01A-11R-A155-07	1	263	-1089.98	281.09	-808.891	0.884091
TCGA-2V-A95S-01A-11R-A37K-07	0	NA	-464.135	2187.99	1723.85	0.65393
TCGA-K7-AAU7-01A-11R-A38B-07	1	58	-301.385	650.866	349.481	0.792263
TCGA-DD-AAW0-01A-11R-A41C-07	0	2015	-39.2679	1089.3	1050.03	0.725442
TCGA-XR-A8TE-01A-11R-A36F-07	1	210	-572.728	-11.0594	-583.788	0.86817
TCGA-G3-A6UC-01A-21R-A33J-07	1	639	-1222.01	-299.09	-1521.1	0.92803
TCGA-BC-A112-01A-11R-A131-07	0	153	-308.571	474.911	166.34	0.808378
TCGA-ED-A459-01A-11R-A266-07	0	910	-909.769	540.468	-369.3	0.852118
TCGA-NI-A8LF-01A-11R-A36F-07	0	799	-421.618	46.9992	-374.618	0.852526
TCGA-BC-A5W4-01A-11R-A28V-07	1	384	-1510.01	-672.101	-2182.11	0.959752
TCGA-CC-A7IE-01A-21R-A38B-07	1	169	-703.825	1249.83	546.006	0.774334
TCGA-5R-AA1D-01A-11R-A38B-07	0	449	1184.88	1028.79	2213.67	0.597891
TCGA-CC-A7II-01A-11R-A33J-07	1	278	-811.961	-369.776	-1181.74	0.90833
TCGA-DD-A73C-01A-12R-A33J-07	1	566	-168.095	223.793	55.6972	0.817832
TCGA-KR-A7K7-01A-11R-A33J-07	1	239	-1161.14	1202.42	41.2794	0.819048
TCGA-DD-AAVP-01A-11R-A41C-07	1	903	-675.646	78.8789	-596.767	0.869114
TCGA-DD-AAD1-01A-11R-A41C-07	1	127	247.986	1364.46	1612.45	0.666214
TCGA-DD-AADS-01A-11R-A41C-07	0	474	-760.997	1426.36	665.365	0.763129
TCGA-DD-A3A1-01A-11R-A213-07	0	233	-1086.59	901.014	-185.576	0.837695
TCGA-RC-A7SB-01A-21R-A352-07	0	588	-1099.32	16.8618	-1082.46	0.902139
TCGA-DD-AAVZ-01A-11R-A41C-07	0	1900	-836.917	75.7187	-761.198	0.880798
TCGA-2Y-A9GT-01A-11R-A38B-07	1	1083	-204.609	1524.92	1320.31	0.697571
TCGA-DD-AADQ-01A-11R-A41C-07	0	436	-1222.64	530.056	-692.582	0.875984
TCGA-DD-A119-01A-11R-A131-07	0	223	-406.79	328.099	-78.6911	0.829024
TCGA-DD-A4NO-01A-11R-A28V-07	1	990	-402.153	153.021	-249.133	0.842754
TCGA-BW-A5NP-01A-11R-A27V-07	1	102	-1409.93	-567.351	-1977.28	0.950875
TCGA-DD-A4NA-01A-11R-A266-07	0	1008	-442.749	565.533	122.784	0.812126
TCGA-MI-A75E-01A-11R-A32O-07	0	507	-183.359	931.638	748.279	0.755207
TCGA-BC-A10Q-01A-11R-A131-07	1	340	-730.442	193.068	-537.374	0.864769
TCGA-DD-AAEE-01A-11R-A41C-07	1	224	-1024.23	-252.282	-1276.52	0.914061
TCGA-BC-A3KG-01A-11R-A213-07	1	209	-1339.24	-126.963	-1466.2	0.924998
TCGA-DD-A3A7-01A-11R-A22L-07	1	144	-1183.84	293.629	-890.208	0.889606
TCGA-CC-A8HV-01A-11R-A36F-07	1	149	-1293.1	-449.356	-1742.46	0.939642
TCGA-DD-AACN-01A-11R-A41C-07	1	357	-338.947	340.225	1.27818	0.822403
TCGA-G3-A25V-01A-11R-A16W-07	1	489	16.8276	1161.11	1177.94	0.712393
TCGA-DD-AAVS-01A-11R-A41C-07	0	1823	-726.174	195.474	-530.7	0.864276
TCGA-CC-A3MB-01A-11R-A213-07	1	260	-1014.46	11.0438	-1003.41	0.897072
TCGA-ZP-A9D0-01A-11R-A37K-07	0	1091	-774.63	-214.972	-989.603	0.896175
TCGA-DD-AAE2-01A-11R-A41C-07	0	638	-264.031	926.297	662.266	0.763423
TCGA-RG-A7D4-01A-12R-A33R-07	0	1098	-1154.33	1538.88	384.545	0.789112
TCGA-DD-A4NK-01A-11R-A28V-07	1	89	-765.805	-114.822	-880.627	0.888963
TCGA-DD-A39W-01A-11R-A213-07	0	827	-1038.15	-72.1218	-1110.27	0.903893
TCGA-DD-AADJ-01A-11R-A41C-07	0	1066	-1063.12	446.38	-616.74	0.87056
TCGA-DD-AACA-01A-11R-A41C-07	1	776	-1088.65	-255.839	-1344.49	0.918062
TCGA-CC-5263-01A-01R-A131-07	0	129	-847.686	627.147	-220.54	0.840487
TCGA-DD-A11C-01A-11R-A131-07	0	662	-136.658	452.435	315.777	0.795272
TCGA-DD-A4NL-01A-11R-A28V-07	0	1711	-253.079	394.877	141.798	0.810494
TCGA-HP-A5N0-01A-11R-A28V-07	1	179	145.58	553.615	699.196	0.75991
TCGA-ZP-A9D1-01A-11R-A38B-07	0	21	-233.69	636.418	402.728	0.78747
TCGA-ES-A2HS-01A-11R-A180-07	0	688	-545.085	-19.9664	-565.051	0.866802
TCGA-UB-AA0U-01A-11R-A38B-07	1	106	8.37085	748.956	757.327	0.754336
TCGA-DD-AAD3-01A-11R-A41C-07	0	1295	-7.399	702.88	695.481	0.760265
TCGA-BW-A5NQ-01A-11R-A27V-07	0	0	-859.886	1408.79	548.899	0.774065
TCGA-DD-A11B-01A-11R-A131-07	0	14	-922.613	-328.277	-1250.89	0.912529
TCGA-G3-A25Y-01A-11R-A16W-07	1	355	-215.857	583.337	367.48	0.790648
TCGA-CC-A7IH-01A-11R-A33J-07	0	365	-1022.56	-480.905	-1503.47	0.927063
TCGA-MR-A8JO-01A-12R-A36F-07	0	330	758.38	1462.89	2221.27	0.596997
TCGA-2Y-A9GX-01A-11R-A38B-07	1	2133	715.417	1717.96	2433.38	0.571733
TCGA-DD-AACS-01A-11R-A41C-07	0	1804	-1284.66	-381.287	-1665.94	0.93574
TCGA-K7-A5RG-01A-11R-A28V-07	0	519	-257.947	2516.85	2258.9	0.592556
TCGA-DD-A1ED-01A-11R-A155-07	0	2301	-136.844	1132.59	995.745	0.730904
TCGA-DD-AADV-01A-11R-A39D-07	0	574	-470.538	159.476	-311.062	0.847612
TCGA-DD-AAD8-01A-11R-A41C-07	0	1219	-1027.51	110.257	-917.253	0.891412
TCGA-DD-A4NQ-01A-21R-A28V-07	1	126	-1010.63	618.874	-391.752	0.853838
TCGA-NI-A4U2-01A-11R-A28V-07	1	106	-515.025	172.087	-342.938	0.850086
TCGA-G3-AAV5-01A-11R-A37K-07	1	117	-1150.5	67.2839	-1083.22	0.902187
TCGA-G3-AAV2-01A-11R-A37K-07	0	372	-837.936	64.9713	-772.965	0.881614
TCGA-BC-A216-01A-11R-A155-07	0	1351	-1035.1	864.061	-171.041	0.836528
TCGA-DD-AAEA-01A-11R-A41C-07	0	575	-1070.59	700.332	-370.255	0.852191
TCGA-EP-A2KC-01A-11R-A213-07	0	19	-851.809	118.032	-733.778	0.878885
TCGA-RC-A6M5-01A-11R-A32O-07	0	15	328.112	200.148	528.259	0.77598
TCGA-2Y-A9GU-01A-11R-A38B-07	0	1939	-1058.96	-210.181	-1269.14	0.913622
TCGA-BC-A10T-01A-11R-A131-07	1	598	100.9	185.316	286.216	0.797896
TCGA-RC-A7SK-01A-11R-A352-07	1	312	-1206.78	-385.532	-1592.31	0.931873
TCGA-BC-A69H-01A-11R-A311-07	0	444	-869.075	915.595	46.5202	0.818606
TCGA-DD-AAVW-01A-11R-A41C-07	0	2317	210.925	812.512	1023.44	0.728124
TCGA-DD-AADO-01A-11R-A41C-07	0	453	-840.606	1459.19	618.583	0.767549
TCGA-ZS-A9CD-01A-11R-A37K-07	1	371	-296.953	652.528	355.574	0.791717
TCGA-DD-AACU-01A-11R-A41C-07	0	1567	-739.494	419.425	-320.068	0.848313
TCGA-G3-A7M5-01A-11R-A33R-07	0	447	-1004.63	353.205	-651.424	0.873054
TCGA-WQ-A9G7-01A-11R-A37K-07	0	30	-1336	-296.835	-1632.83	0.934014
TCGA-G3-A5SJ-01A-11R-A27V-07	1	308	-642.024	1246.16	604.14	0.768906
TCGA-O8-A75V-01A-11R-A32O-07	0	538	-266.604	1182.33	915.725	0.73887
TCGA-ED-A5KG-01A-11R-A27V-07	1	110	534.161	3210.43	3744.6	0.404238
TCGA-CC-A8HU-01A-11R-A36F-07	1	301	-1239.86	-254.868	-1494.73	0.926581
TCGA-DD-AACV-01A-11R-A41C-07	1	344	-1451.21	-753.183	-2204.39	0.960665
TCGA-CC-A8HS-01A-11R-A36F-07	1	201	-1214.43	-428.692	-1643.12	0.934553
TCGA-CC-A123-01A-11R-A131-07	1	145	-911.217	351.449	-559.768	0.866415
TCGA-DD-A3A9-01A-11R-A266-07	1	289	-93.1589	861.606	768.447	0.753264
TCGA-DD-A4ND-01A-11R-A266-07	1	15	606.159	1158.07	1764.23	0.649434
TCGA-ZP-A9CV-01A-11R-A38B-07	1	1088	-197.697	942.835	745.138	0.75551
TCGA-ED-A7XO-01A-11R-A352-07	1	262	-192.957	786.467	593.511	0.769903
TCGA-ZP-A9D2-01A-11R-A38B-07	1	315	-562.036	227.712	-334.325	0.849419
TCGA-2Y-A9GZ-01A-11R-A39D-07	1	719	-1050.22	-420.713	-1470.93	0.925262
TCGA-DD-A11A-01A-11R-A131-07	0	79	-1112.99	-225.475	-1338.46	0.917711
TCGA-LG-A9QC-01A-11R-A37K-07	0	425	-996.093	-415.401	-1411.49	0.921917
TCGA-DD-A4NV-01A-11R-A311-07	0	2398	-259.465	231.164	-28.3011	0.824865
TCGA-CC-A7IG-01A-11R-A33J-07	1	195	-995.92	455.826	-540.094	0.864969
TCGA-DD-AADR-01A-11R-A41C-07	1	1700	-871.713	545.697	-326.017	0.848775
TCGA-BC-A110-01A-11R-A131-07	1	2057	628.231	1583.76	2211.99	0.598089
TCGA-DD-A118-01A-11R-A131-07	1	658	-397.932	24.4191	-373.513	0.852441
TCGA-UB-A7ME-01A-11R-A33J-07	0	486	-458.324	1191.48	733.156	0.756661
TCGA-DD-A4NI-01A-11R-A27V-07	0	816	-174.905	1026.32	851.419	0.745197
TCGA-G3-A3CI-01A-11R-A213-07	0	180	-388.656	959.738	571.082	0.772
TCGA-DD-AACY-01A-11R-A41C-07	1	776	-797.703	308.296	-489.407	0.861211
TCGA-2Y-A9H5-01A-11R-A38B-07	1	258	-342.667	257.081	-85.5862	0.82959
TCGA-ZS-A9CF-01A-11R-A38B-07	1	636	-907.516	378.119	-529.397	0.86418
TCGA-RC-A6M6-01A-11R-A32O-07	0	9	-1456.23	-35.3466	-1491.58	0.926407
TCGA-XR-A8TC-01A-11R-A36F-07	0	1339	-852.986	-245.969	-1098.95	0.903181
TCGA-RC-A7SF-01A-11R-A352-07	1	502	-1020.15	298.727	-721.423	0.878018
TCGA-CC-A7IJ-01A-11R-A33R-07	0	382	818.748	1950.73	2769.47	0.530578
TCGA-DD-A1EL-01A-11R-A155-07	1	415	-1359.48	201.455	-1158.03	0.906869
TCGA-BC-A10Z-01A-11R-A131-07	0	34	-1538.51	-767.421	-2305.93	0.964697
TCGA-G3-A5SM-01A-12R-A28V-07	1	252	43.6836	987.145	1030.83	0.727379
TCGA-DD-AAVQ-01A-11R-A41C-07	1	1509	-344.132	2030.7	1686.57	0.658061
TCGA-CC-5259-01A-31R-A213-07	1	180	-1365.9	574.587	-791.312	0.882882
TCGA-DD-AAE4-01A-11R-A41C-07	1	111	-2.04641	1777.08	1775.03	0.648228
TCGA-DD-AACL-01A-11R-A41C-07	0	107	-548.012	1789.2	1241.19	0.705846
TCGA-DD-AADW-01A-11R-A39D-07	1	386	-573.82	-393.678	-967.498	0.89473
TCGA-DD-A39Y-01A-11R-A213-07	0	171	-1249.02	-4.87534	-1253.89	0.912709
TCGA-ED-A7PZ-01A-11R-A33R-07	0	6	-1543.62	-553.583	-2097.2	0.956177
TCGA-DD-AAD6-01A-11R-A41C-07	1	50	-1499.83	39.1827	-1460.65	0.924688
TCGA-RC-A6M4-01A-11R-A32O-07	0	22	-1319.35	-680.225	-1999.58	0.951883
TCGA-KR-A7K0-01A-12R-A33R-07	0	65	-574.175	287.507	-286.668	0.845707
TCGA-DD-A73D-01A-12R-A32O-07	1	592	-1584.47	-689.94	-2274.41	0.963469
TCGA-DD-AADU-01A-11R-A41C-07	0	554	-1330.84	-21.7792	-1352.62	0.918535
TCGA-G3-A3CJ-01A-11R-A213-07	1	296	-862.894	230.06	-632.834	0.87172
TCGA-DD-A1EI-01A-11R-A131-07	0	183	-28.2468	508.781	480.534	0.780379
TCGA-DD-A4NS-01A-11R-A311-07	1	893	576.259	1239.75	1816.01	0.643636
TCGA-ED-A7PX-01A-51R-A352-07	0	6	9.77022	370.921	380.691	0.78946
TCGA-BD-A3ER-01A-11R-A213-07	1	226	59.262	599.575	658.837	0.763748
TCGA-2Y-A9H0-01A-11R-A38B-07	0	3675	-1129.92	796.38	-333.537	0.849358
TCGA-DD-AACP-01A-11R-A41C-07	0	415	-1683.34	-319.457	-2002.8	0.952028
TCGA-2Y-A9GS-01A-12R-A38B-07	1	102	-573.327	619.086	45.7587	0.818671
TCGA-5R-AA1C-01A-11R-A41C-07	0	520	-863.554	331.589	-531.966	0.86437
TCGA-DD-AACE-01A-11R-A41C-07	1	1279	-770.353	-90.173	-860.526	0.887607
TCGA-WX-AA44-01A-11R-A39D-07	1	246	-973.423	366.419	-607.004	0.869856
TCGA-ED-A7XP-01A-11R-A352-07	1	187	-388.861	490.049	101.188	0.813971
TCGA-DD-A1EC-01A-21R-A131-07	1	299	-228.872	2452.51	2223.64	0.596718
TCGA-DD-AAVV-01A-11R-A41C-07	0	2455	34.7348	1461.03	1495.76	0.678889
TCGA-2Y-A9H8-01A-11R-A39D-07	1	398	-975.412	917.843	-57.569	0.827286
TCGA-RC-A7SH-01A-11R-A38B-07	1	91	-1304.3	-430.461	-1734.76	0.939254
TCGA-ZS-A9CE-01A-11R-A37K-07	1	892	-1253.94	-540.113	-1794.05	0.942206
TCGA-BC-A10U-01A-11R-A131-07	1	586	-1311.32	38.3043	-1273.02	0.913853
TCGA-ZP-A9CZ-01A-11R-A38B-07	0	706	-284.793	1149.05	864.259	0.743939
TCGA-DD-AAW2-01A-11R-A41C-07	1	391	-862.798	-268.061	-1130.86	0.905181
TCGA-G3-A25X-01A-11R-A16W-07	0	1779	-131.135	1496.43	1365.29	0.692825
TCGA-DD-AADA-01A-11R-A41C-07	0	1233	-335.41	1043.55	708.142	0.759056
TCGA-DD-AACD-01A-11R-A41C-07	1	151	-439.492	1053.12	613.629	0.768015
TCGA-G3-AAV3-01A-11R-A37K-07	0	412	-364.964	1376.59	1011.63	0.72931
TCGA-G3-A3CH-01A-11R-A22L-07	1	116	-474.939	583.876	108.938	0.81331
TCGA-G3-A3CK-01A-11R-A213-07	0	585	-751.53	706.088	-45.4429	0.826285
TCGA-5C-A9VG-01A-11R-A37K-07	0	328	-454.059	-330.404	-784.463	0.88241
TCGA-G3-A7M8-01A-11R-A33R-07	0	430	-329.421	280.809	-48.6125	0.826547
TCGA-DD-A4NR-01A-11R-A311-07	0	9	125.97	2330.72	2456.69	0.568922
TCGA-FV-A4ZP-01A-12R-A266-07	0	2486	-793.322	1223.48	430.162	0.784982
TCGA-UB-AA0V-01A-11R-A38B-07	0	314	104.647	607.332	711.98	0.758689
TCGA-DD-A116-01A-11R-A131-07	1	828	-685.773	433.555	-252.217	0.842998
TCGA-DD-A1EH-01A-11R-A131-07	1	120	-522.853	-121.763	-644.616	0.872566
TCGA-CC-A9FS-01A-11R-A37K-07	1	109	-1002.63	2.01921	-1000.61	0.89689
TCGA-DD-A1EK-01A-11R-A213-07	1	167	-409.747	799	389.253	0.788688
TCGA-CC-A3MA-01A-11R-A213-07	1	261	-509.908	-115.781	-625.688	0.871206
TCGA-DD-A4NH-01A-11R-A27V-07	1	161	-666.359	921.822	255.463	0.800609
TCGA-PD-A5DF-01A-11R-A27V-07	1	639	130.354	884.094	1014.45	0.729027
TCGA-UB-A7MD-01A-12R-A352-07	0	52	-294.65	932.213	637.563	0.76576
TCGA-BC-A69I-01A-11R-A311-07	0	387	-310.186	463.845	153.658	0.809473
TCGA-FV-A2QR-01A-11R-A213-07	1	561	-268.359	186.77	-81.5898	0.829262
TCGA-DD-AACC-01A-11R-A41C-07	1	537	87.3614	2643.14	2730.5	0.535418
TCGA-WX-AA47-01A-11R-A39D-07	1	103	-1442.32	-442.977	-1885.3	0.946609
TCGA-MI-A75I-01A-11R-A32O-07	1	265	-1212.51	187.732	-1024.78	0.898454
TCGA-ED-A8O6-01A-11R-A36F-07	0	56	-991.686	-11.4781	-1003.16	0.897056
TCGA-CC-A1HT-01A-11R-A131-07	0	101	115.341	2125.9	2241.24	0.594643
TCGA-HP-A5MZ-01A-21R-A27V-07	0	91	593.878	1557.75	2151.63	0.605167
TCGA-DD-A113-01A-11R-A131-07	1	1676	-776.531	488.343	-288.187	0.845826
TCGA-DD-A3A8-01A-11R-A22L-07	0	11	-1162.38	-194.793	-1357.17	0.918799
TCGA-DD-AADP-01A-11R-A39D-07	0	458	-567.358	361.343	-206.014	0.83933
TCGA-DD-A73G-01A-22R-A32O-07	0	3478	-758.44	600.46	-157.98	0.835476
TCGA-G3-A7M7-01A-12R-A352-07	0	361	-845.955	-80.8107	-926.765	0.892044
TCGA-CC-A5UE-01A-11R-A28V-07	1	175	-1572.56	-29.6869	-1602.25	0.932401
TCGA-DD-AACX-01A-11R-A41C-07	1	42	-1320.19	173.64	-1146.55	0.906158
TCGA-DD-AADD-01A-11R-A41C-07	0	1231	-1538.47	-118.34	-1656.81	0.935266
TCGA-DD-A73F-01A-11R-A32O-07	0	1085	-201.395	1808.4	1607.01	0.66681
TCGA-CC-A9FW-01A-11R-A37K-07	1	153	-1393.06	144.868	-1248.19	0.912367
TCGA-BC-A10R-01A-11R-A131-07	1	199	-128.863	-10.6964	-139.559	0.833987
TCGA-ES-A2HT-01A-12R-A180-07	0	438	-260.396	715.781	455.385	0.782682
TCGA-DD-A3A4-01A-11R-A22L-07	1	87	-925.35	-485.645	-1410.99	0.921889
TCGA-WX-AA46-01A-11R-A39D-07	0	756	-330.531	422.926	92.3952	0.81472
TCGA-DD-A1EE-01A-11R-A131-07	1	44	-1084.53	-255.333	-1339.86	0.917793
TCGA-FV-A4ZQ-01A-11R-A266-07	0	12	-1026.98	1773.93	746.949	0.755335
