# Supplementary material for: Identification of Prognostic Genes in the Tumor Microenvironment of Hepatocellular Carcinoma
Source: Front Immunol. 2021 Apr 7;12:653836. doi: 10.3389/fimmu.2021.653836 (PMC8059369; doi:10.3389/fimmu.2021.653836)
Supplement: Supplementary Table 3 — The immune/stromal/Estimate scores and tumor purity with the clinical parameters of hepatocellular carcinoma (HCC), including tumor, metastasis, OS, grade, stage, and cancer status. [file Table_3.xlsx]

## Sheet: Sheet1
A0_Samples	EMR3	GBP5	CASKIN1	OS	A3_T	A4_N	A5_M	A6_Stage	A7_Grade	cancer_status	StromalScore	ImmuneScore	ESTIMATEScore	TumorPurity
TCGA-G3-A25X	0.345527	3.68932	0.00979154	Alive	T2	N0	M0	Stage II	G3	TUMOR FREE	907.54	2645.77	3553.31	0.429757
TCGA-2Y-A9GW	0.519402	6.59594	0.025022	Dead	T1	N0	MX	Stage I	G2	WITH TUMOR	-1407.2	-375.777	-1782.98	0.94166
TCGA-G3-A5SJ	0.557251	8.91218	0	Alive	T1	NX	M0	Stage I	G2	TUMOR FREE	722.498	1937.92	2660.42	0.544079
TCGA-2Y-A9GT	0.0294699	18.1114	0	Dead	T1	NX	MX	Stage I	G2	WITH TUMOR	-738.201	1433.5	695.299	0.760282
TCGA-XR-A8TF	0.0270828	1.71728	0.104376	Dead	T1	NX	MX	Stage I	G1	TUMOR FREE	-1046.94	62.5018	-984.433	0.895838
TCGA-2Y-A9H9	0.057634	1.72684	0.01851	Alive	T1	N0	MX	Stage I	G2	WITH TUMOR	-969.019	-338.064	-1307.08	0.915872
TCGA-FV-A3I1	0.0458025	4.5399	0.0551629	Dead	T2	N0	MX	Stage II	G2	TUMOR FREE	-1530.18	-65.196	-1595.37	0.932036
TCGA-DD-AADO	0.0589353	2.69666	0.00946395	Alive	T1	N0	M0	Stage I	G3	TUMOR FREE	-693.16	738.771	45.6115	0.818683
TCGA-G3-AAV7	0.552317	2.55926	0.319291	Alive	T2	N0	M0	Stage II	G2	TUMOR FREE	-1213.02	283.706	-929.31	0.892213
TCGA-RC-A7S9	0.056399	2.09592	0.0181133	Alive	T1	N0	M0	Stage I	G3	TUMOR FREE	50.4909	1087.14	1137.63	0.716532
TCGA-UB-A7MF	0.11807	448.012	0.0650057	Dead	T3a	NX	MX	Stage IIIA	G2	WITH TUMOR	-868.261	-52.3357	-920.597	0.891634
TCGA-ED-A66X	1.34874	2.20852	0.63892	Alive	T3a	N0	M0	Stage IIIA	G3	TUMOR FREE	-40.0571	1357.69	1317.63	0.697853
TCGA-DD-AADV	0.0179074	1.541	0.086268	Alive	T1	N0	M0	Stage I	G3	TUMOR FREE	-500.886	2079.5	1578.61	0.66991
TCGA-MI-A75E	0.319193	1.60878	0	Alive	T4	N0	M0	Stage IIIC	G2	TUMOR FREE	-1062.88	-67.23	-1130.11	0.905135
TCGA-CC-A3MC	0	0.873507	0.246041	Alive	T3	N0	M0	Stage IIIA	G2	WITH TUMOR	-420.357	240.733	-179.624	0.837218
TCGA-DD-A1EG	0.0840859	6.72621	0.00810161	Dead	T1	N0	M0	Stage I	G3	WITH TUMOR	-1274.17	-870.173	-2144.34	0.95818
TCGA-DD-A4NB	0.030258	3.83721	0	Alive	T1	N0	M0	Stage I	G2	TUMOR FREE	37.0718	1351.21	1388.28	0.690388
TCGA-DD-AADK	0.193275	1.56221	0.372438	Alive	T2	N0	M0	Stage II	G3	TUMOR FREE	-1051.56	691.312	-360.247	0.851421
TCGA-DD-AADN	0	8.79366	0.0156492	Alive	T1	NX	MX	Stage I	G4	TUMOR FREE	-1144.34	-312.571	-1456.91	0.924479
TCGA-G3-A7M8	0.0484879	0.456113	0.0233588	Alive	T1	NX	MX	Stage I	G1	TUMOR FREE	-1046.88	-257.324	-1304.2	0.915702
TCGA-MR-A8JO	0.0350209	10.8957	0.0506135	Alive	T1	N0	MX	Stage I	G3	TUMOR FREE	-268.88	907.075	638.195	0.7657
TCGA-2Y-A9GU	0.0593474	1.37499	0.371675	Alive	T1	NX	MX	Stage I	G2	TUMOR FREE	255.901	1009.59	1265.49	0.703315
TCGA-WX-AA46	0.168568	1.33771	0	Alive	T2	NX	MX	Stage II	G1	TUMOR FREE	-919.072	122.366	-796.706	0.883254
TCGA-DD-A115	0.298464	1.73653	0.0143784	Dead	T3	N0	M0	Stage IIIA	G2	WITH TUMOR	-1302.51	-495.302	-1797.81	0.942391
TCGA-5C-A9VH	0	0.901187	0.19171	Alive	T1	N0	M0	Stage I	G2	TUMOR FREE	-1535.37	-575.324	-2110.69	0.956755
TCGA-G3-A25V	0.0614248	4.31572	0	Alive	T1	N0	M0	Stage I	G2	WITH TUMOR	0.373676	1490.52	1490.9	0.679413
TCGA-BC-A3KF	0.0491118	1.41446	0.0473188	Alive	T1	NX	M0	Stage I	G2	TUMOR FREE	98.1445	1555.16	1653.3	0.66173
TCGA-FV-A2QR	0.0237417	1.04222	0.0114375	Dead	T1	N0	M0	Stage I	G1	WITH TUMOR	-464.594	437.335	-27.2592	0.824779
TCGA-DD-AACG	0	0.764395	0.035628	Dead	T2	N0	M0	Stage II	G4	WITH TUMOR	-234.011	1490.23	1256.21	0.704282
TCGA-DD-A11C	0	2.63496	0.0861343	Alive	T1	N0	M0	Stage I	G3	TUMOR FREE	-1098.79	-523.281	-1622.07	0.933449
TCGA-2Y-A9H0	0	8.21639	0.0973817	Alive	T3	N0	M0	Stage IIIA	G1	TUMOR FREE	-356.657	1394.03	1037.37	0.72672
TCGA-2Y-A9H2	0.638637	4.55538	0.145734	Alive	T1	N0	MX	Stage I	G3	TUMOR FREE	-270.04	464.743	194.703	0.805921
TCGA-BC-A217	0	4.24612	0.149271	Dead	T2	NX	M0	Stage II	G3	TUMOR FREE	-430.133	583.191	153.058	0.809525
TCGA-DD-AADG	0.0739911	0.489788	0	Alive	T3a	N0	M0	Stage IIIA	G3	TUMOR FREE	-1122.76	-471.079	-1593.84	0.931954
TCGA-DD-AAW2	0.0402423	0.560813	0.0193866	Alive	T1	N0	M0	Stage I	G2	WITH TUMOR	-1455.43	234.518	-1220.92	0.910721
TCGA-BC-A110	0.336031	1.79511	0.0179868	Dead	T1	NX	MX		G1	WITH TUMOR	-146.059	1781.09	1635.03	0.663738
TCGA-2Y-A9GY	0.0880376	22.1529	0.307485	Dead	T2	NX	MX	Stage II	G3	WITH TUMOR	-1385.7	-506.966	-1892.66	0.946957
TCGA-DD-AADD	0	3.18141	1.06504	Alive	T1	N0	M0	Stage I	G4	TUMOR FREE	-576.347	1051.68	475.329	0.780857
TCGA-DD-A3A1	0.148093	1.01716	0.0101919	Dead	T3b	N0	M0	Stage IIIA	G2	TUMOR FREE	-707	-426.439	-1133.44	0.905342
TCGA-CC-A5UE	0.096436	0.814753	0.0348432	Dead	T4	N0	M0	Stage IIIB	G2	WITH TUMOR	-668.048	475.215	-192.834	0.838277
TCGA-DD-AACK	0.0101222	1.3683	0	Alive	T1	N0	M0	Stage I	G2	TUMOR FREE	-1169.21	2017.54	848.325	0.7455
TCGA-ED-A4XI	0	6.56015	0.114533	Alive	T2	N0	M0	Stage II	G3	TUMOR FREE	186.393	884.878	1071.27	0.723293
TCGA-DD-AACY	0	0.941391	0.0419905	Alive	T1	N0	M0	Stage I	G3	WITH TUMOR	-529.832	964.954	435.122	0.78453
TCGA-DD-AAE7	0.0345302	1.09475	0.0332695	Alive	T1	N0	M0	Stage I	G2	TUMOR FREE	-1373.3	-70.1592	-1443.46	0.923724
TCGA-2Y-A9H7	0.0538975	1.03278	0.0432748	Alive	T1	N0	MX	Stage I	G2	WITH TUMOR	-509.499	427.947	-81.5521	0.829259
TCGA-BC-A10U	0	0.656489	0.299467	Dead	T2	NX	MX		G2	WITH TUMOR	-445.989	1388.62	942.633	0.736202
TCGA-2Y-A9H5	0.0519869	2.09195	0.864035	Dead	T1	N0	MX	Stage I	G3	WITH TUMOR	-321.223	43.1866	-278.036	0.84503
TCGA-DD-AAE2	0.081861	23.4578	0.00985904	Alive	T1	N0	M0	Stage I	G3	TUMOR FREE	-1015.84	-241.483	-1257.33	0.912915
TCGA-DD-AACM	#N/A	#N/A	#N/A	Alive	T2	N0	M0	Stage II	G3	#N/A	-1136.52	-349.989	-1486.5	0.926126
TCGA-WQ-AB4B	0	0.410781	0	Alive	T2	NX	M0	Stage II	G2	WITH TUMOR	-888.455	461.926	-426.529	0.856484
TCGA-G3-A7M6	0.293923	4.07048	0.129797	Alive	T1	NX	MX	Stage I	G3	WITH TUMOR	330.615	859.368	1189.98	0.711151
TCGA-DD-AAD1	0.394883	7.94503	0.0951166	Alive	T1	N0	M0	Stage I	G4	WITH TUMOR	-682.192	603.686	-78.5055	0.829009
TCGA-DD-A4NJ	0.346619	3.39641	0.125237	Alive	T2	N0	M0	Stage II	G2	WITH TUMOR	-717.057	-74.173	-791.23	0.882876
TCGA-XR-A8TG	0.0720749	1.14672	0.0231478	Alive	T1	NX	M0	Stage I	G2	TUMOR FREE	-908.701	21.9141	-886.787	0.889376
TCGA-ZP-A9CY	0.02419	1.38215	0.0233069	Alive	T1	NX	MX		G1	TUMOR FREE	-556.833	179.683	-377.149	0.85272
TCGA-ZS-A9CF	0.120245	2.33553	0.0579274	Alive	T2	NX	MX	Stage II	G2	TUMOR FREE	-861.232	218.41	-642.822	0.872438
TCGA-FV-A496	0.878218	0.142785	0.0752138	Alive	T1	NX	M0	Stage I	G2	TUMOR FREE	1042.89	2269.13	3312.02	0.461463
TCGA-ED-A66Y	0	0.331424	0.203678	Dead	T3a	N0	M0	Stage IIIA	G3	TUMOR FREE	-528.65	271.888	-256.762	0.843356
TCGA-5R-AA1D	0.0577902	2.49661	0.0139201	Alive	T3a	N0	M0	Stage IIIA	G3	TUMOR FREE	-43.5418	1400.53	1356.98	0.693704
TCGA-G3-A25S	0.503218	1.44639	0.0505048	Dead	T1	N0	M0	Stage I	G2	WITH TUMOR	-759.107	-213.478	-972.585	0.895063
TCGA-DD-AACE	0	2.10418	0.017115	Alive	T1	N0	M0	Stage I	G3	TUMOR FREE	-542.343	916.964	374.62	0.790006
TCGA-DD-A73E	0	0.0757735	1.03279	Alive	T1	N0	M0	Stage I	G1	TUMOR FREE	-1415.87	272.634	-1143.23	0.905952
TCGA-RC-A7SH	0.0650393	0.509839	0.0626648	Alive	T2	N0	M0	Stage II	G3	WITH TUMOR	-47.5923	1070.62	1023.03	0.728164
TCGA-K7-A5RG	0.101952	82.424	0.135067	Alive	T1	NX	MX	Stage I	G1	TUMOR FREE	-825.823	487.403	-338.421	0.849737
TCGA-LG-A9QC	0.0318832	0.899749	0.0460787	Alive	T1	NX	M0	Stage I	G2	TUMOR FREE	-1361.86	-601.55	-1963.41	0.950243
TCGA-ZP-A9D4	0.0511604	1.34572	0.271109	Alive	T1	NX	MX		G1	TUMOR FREE	-704.62	34.2492	-670.371	0.874407
TCGA-DD-AAE0	0	1.17793	0.142875	Alive	T3a	N0	M0	Stage IIIA	G4	TUMOR FREE	-210.613	1875.8	1665.18	0.660421
TCGA-MI-A75G	0.0187562	0.182969	0.00903573	Alive	T2	N0	M0	Stage II	G2	TUMOR FREE	-1483.26	-266.776	-1750.04	0.940022
TCGA-DD-A4NE	0.0262604	0.256173	0.063254	Dead	T3a	N0	M0	Stage IIIA	G3	WITH TUMOR	-310.83	616.511	305.681	0.79617
TCGA-ZP-A9CZ	0.174116	7.39206	0.179742	Alive	T1	NX	MX		G1	TUMOR FREE	-1157.06	152.497	-1004.56	0.897147
TCGA-DD-A39X	0	0.510147	0.0542619	Dead	T1	NX	M0	Stage I	G2	WITH TUMOR	-729.164	397.407	-331.757	0.84922
TCGA-FV-A3I0	0.267579	0.922914	0.025781	Alive	T2	NX	M0	Stage II	G2	WITH TUMOR	635.761	1292.63	1928.39	0.630925
TCGA-ED-A7PX	0.0645151	1.14632	0.372959	Alive	T2	NX	M0	Stage II	G3	TUMOR FREE	-984.081	-163.034	-1147.12	0.906193
TCGA-NI-A8LF	0.0233672	0.97693	0.0675424	Alive	T1	NX	MX	Stage I	G3	TUMOR FREE	-495.208	337.778	-157.431	0.835432
TCGA-EP-A12J	0	2.05957	0.115976	Alive	T1	NX	MX	Stage I	G1	TUMOR FREE	-486.46	546.631	60.1712	0.817454
TCGA-DD-AAD3	0.0458266	1.16551	0.0331151	Alive	T1	N0	M0	Stage I	G2	TUMOR FREE	-1083.62	421.92	-661.702	0.873789
TCGA-DD-A1EB	0.049418	2.26405	0.0714207	Alive	T1	N0	M0	Stage I	G2	Discrepancy	270.262	1353.12	1623.39	0.665016
TCGA-FV-A4ZQ	0.0460181	41.3481	0.34362	Alive	T1	NX	M0	Stage I	G2	TUMOR FREE	-374.76	442.374	67.6132	0.816824
TCGA-RC-A7SF	0	2.76724	0.0274294	Alive	T1	N0	M0	Stage I	G2	WITH TUMOR	-1377.19	-271.184	-1648.38	0.934827
TCGA-MR-A520	0	0.747483	0.0229685	Alive	T1	NX	MX	Stage I	G1	TUMOR FREE	311	923.775	1234.77	0.706513
TCGA-DD-AAEK	0.0468309	11.5352	0.473772	Alive	T2	N0	M0	Stage II	G3	TUMOR FREE	-126.423	620.683	494.26	0.779118
TCGA-ZP-A9D0	0.0240846	0.6545	0.185643	Alive	T1	NX	MX		G1	TUMOR FREE	-1260.11	764.891	-495.222	0.861645
TCGA-DD-AAVS	0.198378	2.05808	0.23361	Alive	T1	N0	M0	Stage I	G2	TUMOR FREE	-1209.1	-386.648	-1595.75	0.932056
TCGA-DD-AAEB	0	0.326963	0	Alive	T1	N0	M0	Stage I	G2	TUMOR FREE	-1240.62	525.255	-715.37	0.877593
TCGA-DD-AADY	0	1.11773	0.020336	Alive	T1	N0	M0	Stage I	G2	TUMOR FREE	-49.7795	1298.57	1248.79	0.705056
TCGA-DD-AACA	0.0684334	1.67689	0.406599	Alive	T1	N0	M0	Stage I	G3	WITH TUMOR	-4.02593	1160.81	1156.78	0.714568
TCGA-DD-AADA	0.0228056	3.24172	0.0109865	Alive	T1	N0	M0	Stage I	G3	TUMOR FREE	1003.19	881.006	1884.19	0.635944
TCGA-DD-AACL	2.76946	10.772	0.219044	Dead	T1	N0	M0	Stage I	G3	Unknown	-304.271	386.723	82.4518	0.815566
TCGA-DD-AAD6	0.0541806	0.88719	0.678633	Alive	T3a	N0	M0	Stage IIIA	G3	TUMOR FREE	-952.665	-326.428	-1279.09	0.914214
TCGA-DD-AACJ	0	0.183782	0	Alive	T2	N0	M0	Stage II	G2	WITH TUMOR	-403.983	845.26	441.277	0.78397
TCGA-5R-AAAM	0.0279006	2.24544	0	Dead	T2	N0	M0	Stage II	G2	TUMOR FREE	-914.584	1125.72	211.131	0.804491
TCGA-2Y-A9H4	0	0.801412	0	Alive	T1	N0	MX	Stage I	G2	TUMOR FREE	-1084.4	640.699	-443.699	0.857782
TCGA-DD-AAD2	0.0326893	3.33694	0.0787397	Alive	T1	N0	M0	Stage I	G2	TUMOR FREE	-235.266	397.927	162.661	0.808696
TCGA-DD-AADS	0	1.96931	0.0115384	Alive	T1	N0	M0	Stage I	G2	TUMOR FREE	-202.953	1792.41	1589.45	0.668727
TCGA-CC-A5UC	0.12621	1.89076	0.805615	Dead	T3	N0	M0	Stage IIIA	G3	WITH TUMOR	50.5347	1123.3	1173.84	0.712815
TCGA-EP-A3RK	0.201281	9.42802	0	Alive	T3a	NX	MX	Stage IIIA	G2	WITH TUMOR	-1180.36	685.461	-494.899	0.861621
TCGA-ED-A7XP	0.180982	3.71229	0.0544922	Alive	T2	N0	M0	Stage II	G3	WITH TUMOR	-1497.72	611.681	-886.042	0.889326
TCGA-BC-A69H	0	1.89141	0.0199645	Alive	T2	NX	M0	Stage II	G3	TUMOR FREE	-1225.6	-315.669	-1541.27	0.929129
TCGA-BC-A5W4	0	0.505373	0	Dead	T3a	NX	M0	Stage IIIA	G3	TUMOR FREE	-1101.26	-435.733	-1536.99	0.928896
TCGA-ED-A627	0.66206	13.2672	0.118128	Alive	T1	NX	M0	Stage I	G2	TUMOR FREE	-1227.82	309.81	-918.013	0.891462
TCGA-DD-AAVR	0.321445	3.42372	0.0442442	Alive	T1	N0	M0	Stage I	G2	TUMOR FREE	-206.571	787.888	581.316	0.771044
TCGA-DD-AAE9	0.0451908	0.818706	0.0435409	Alive	T1	N0	M0	Stage I	G3	TUMOR FREE	-743.863	508.361	-235.501	0.841675
TCGA-DD-AADB	0	12.9839	0.153247	Alive	T1	N0	M0	Stage I	G4	TUMOR FREE	-795.098	185.987	-609.11	0.870008
TCGA-CC-A9FW	0.122111	2.59514	2.2256	Alive	T3	N0	M0	Stage IIIA	G2	WITH TUMOR	-1135.54	115.853	-1019.68	0.898125
TCGA-HP-A5MZ	0.0215992	4.65804	0	Dead	T1	NX	M0	Stage I	G2	TUMOR FREE	-55.0819	1390.73	1335.65	0.695956
TCGA-XR-A8TC	0.0473556	0.46196	0.0456267	Alive	T1	NX	MX	Stage I	G2	WITH TUMOR	-1151.94	-374.849	-1526.79	0.928341
TCGA-RC-A7SK	0	0.499896	0.109719	Alive	T1	N0	M0	Stage I	G3	TUMOR FREE	-1145.44	-136.75	-1282.19	0.914399
TCGA-BC-A10W	0.0807118	3.26893	0.0874858	Dead	T4	NX	MX		G3	WITH TUMOR	-830.793	1458.26	627.465	0.766712
TCGA-UB-A7ME	0.188634	7.346	0.737087	Alive	T1	NX	MX	Stage I	G2	TUMOR FREE	-1428.31	-229.049	-1657.36	0.935294
TCGA-DD-A73B	0.12268	0.676741	0.0295504	Dead	T1	N0	M0	Stage I	G2	WITH TUMOR	-263.936	871.955	608.019	0.768542
TCGA-G3-AAV2	0	0.326678	0.282321	Alive	T1	N0	M0	Stage I	G1	TUMOR FREE	-110.41	703.598	593.188	0.769933
TCGA-XR-A8TE	0.0242452	0.912273	0.712482	Alive	T3	N0	MX	Stage IIIA	G1	WITH TUMOR	98.8046	1810.67	1909.48	0.633076
TCGA-PD-A5DF	0.0512366	1.51731	0	Dead	T4	N0	M0	Stage IIIB	G2	WITH TUMOR	37.9601	679.291	717.251	0.758185
TCGA-DD-AAW1	0	0.874644	0.0620211	Alive	T3	N0	M0	Stage IIIA	G2	TUMOR FREE	-878.812	-110.937	-989.749	0.896184
TCGA-WX-AA44	0.154251	2.47207	0.0185775	Alive	T1	NX	MX	Stage I	G3	WITH TUMOR	314.589	1501.51	1816.1	0.643626
TCGA-DD-AAVV	0.0513165	8.50125	0.210133	Alive	T2	N0	M0	Stage II	G3	TUMOR FREE	-229.428	1585.04	1355.61	0.693849
TCGA-UB-A7MA	0.111936	1.01395	0.202217	Alive	T2b	N0	M0	Stage II	G2	WITH TUMOR	-705.848	115.266	-590.583	0.868664
TCGA-UB-A7MB	0.0235755	0.410682	0.124931	Alive	T2	NX	MX	Stage II	G3	WITH TUMOR	-380.118	882.698	502.579	0.778352
TCGA-DD-A4NK	0	0.867783	0.0681776	Dead	T3	N0	M0	Stage IIIA	G2	WITH TUMOR	-1141.28	-245.176	-1386.46	0.920487
TCGA-4R-AA8I	0.0295397	1.97598	0.0426918	Dead	T2	NX	MX	Stage II	G2	WITH TUMOR	-930.461	1228.37	297.912	0.796859
TCGA-DD-AAW3	0.0754514	0.473167	0.0181742	Alive	T1	N0	M0	Stage I	G2	TUMOR FREE	-808.537	-59.9313	-868.468	0.888144
TCGA-DD-AAD0	0	0.764362	0.0128893	Alive	T1	N0	M0	Stage I	G2	WITH TUMOR	-430.058	1030.32	600.258	0.76927
TCGA-DD-A4NG	0.131629	3.56555	0.174382	Dead	T3a	NX	M0	Stage IIIA	G2	WITH TUMOR	-977.499	-120.144	-1097.64	0.903098
TCGA-2Y-A9GV	0	2.49136	0.0665685	Dead	T1	NX	MX	Stage I	G1	WITH TUMOR	417.305	808.465	1225.77	0.707448
TCGA-DD-A4NA	0.305411	5.16545	0.14713	Alive	T2	N1	M0	Stage IIIC	G3	TUMOR FREE	15.3261	934.13	949.456	0.735524
TCGA-G3-AAV1	0.0502539	0.954204	0.121048	Dead	T4	N0	M0	Stage IIIC	G3	WITH TUMOR	-166.889	835.394	668.504	0.762831
TCGA-DD-AACH	0.0202557	1.48198	0.097581	Dead	T2	N0	M0	Stage II	G3	TUMOR FREE	-837.523	567.57	-269.952	0.844395
TCGA-FV-A2QQ	0	1.78941	0	Alive	T1	N0	MX	Stage I	G2	TUMOR FREE	861.451	2873.21	3734.66	0.405572
TCGA-DD-A73C	0	1.64446	0.0439395	Alive	T3a	N0	M0	Stage IIIA	G1	WITH TUMOR	-236.395	844.504	608.109	0.768533
TCGA-DD-AAEE	0	0.667636	0.075361	Alive	T1	N0	M0	Stage I	G4	WITH TUMOR	-804.426	335.945	-468.481	0.859646
TCGA-YA-A8S7	0.226182	5.86631	0.0121069	Dead	T3a	N0	MX	Stage IIIA	G3	WITH TUMOR	-1111.89	808.163	-303.723	0.84704
TCGA-CC-A8HT	0.382866	4.36081	0.156068	Dead	T3	N0	M0	Stage IIIA	G2	WITH TUMOR	-831.229	372.481	-458.748	0.858915
TCGA-CC-5259	0.0275638	1.13317	0	Alive	T4	N0	M0	Stage IIIC	G2	WITH TUMOR	-41.4774	1611.24	1569.76	0.670874
TCGA-DD-AAW0	0.230895	3.82909	0.100109	Alive	T1	N0	M0	Stage I	G2	TUMOR FREE	-768.446	-257.231	-1025.68	0.898512
TCGA-BC-4073	#N/A	#N/A	#N/A	Alive	T3	N0	MX	Stage IIIA	G3	#N/A	-100.241	764.297	664.056	0.763253
TCGA-DD-AACF	0	1.36449	0	Dead	T1	N0	M0	Stage I	G3	WITH TUMOR	256.525	1824.54	2081.06	0.61338
TCGA-DD-A11A	0.0618271	0.430808	0.0893547	Alive	T1	N0	M0	Stage I	G3	Unknown	-307.449	1730.86	1423.41	0.686649
TCGA-BC-A10Y	0.154445	1.6546	0.0558024	Dead	T4	NX	MX		G3	WITH TUMOR	-957.168	711.366	-245.802	0.842491
TCGA-CC-A123	0.0410662	0.250379	0	Alive	T3	N0	M0	Stage IIIA	G1	WITH TUMOR	372.805	1923.31	2296.12	0.588147
TCGA-G3-A5SK	0.081185	3.41301	0	Alive	T1	NX	M0	Stage I	G1	WITH TUMOR	-784.666	78.3451	-706.32	0.876955
TCGA-DD-AAVP	0.0427414	1.26573	0.123543	Alive	T1	N0	M0	Stage I	G1	TUMOR FREE	290.748	1692.16	1982.91	0.624695
TCGA-KR-A7K8	0	13.9068	0	Alive	T1	N0	M0	Stage I	G1	TUMOR FREE	-1042.26	570.281	-471.977	0.859908
TCGA-BC-A10Z	0.783114	0.347865	0.0377262	Dead	T1	N0	MX	Stage I	G2	TUMOR FREE	-497.124	859.158	362.034	0.791138
TCGA-G3-AAV3	0.0222881	13.0997	0.0966346	Alive	T2	N0	M0	Stage II	G2	TUMOR FREE	-590.679	314.927	-275.752	0.844851
TCGA-RC-A6M4	0	0.175145	0.0372587	Alive	T3	NX	MX	Stage IIIA	G2	Unknown	-1188.08	326.557	-861.52	0.887675
TCGA-BW-A5NO	0.0829041	2.97501	0.0199694	Alive	T3a	NX	MX	Stage IIIA	G2	TUMOR FREE	-887.508	-439.676	-1327.18	0.917052
TCGA-DD-A1EI	0.087002	2.0551	0.0502954	Alive	T1	N0	M0	Stage I	G2	TUMOR FREE	-1102.54	125.111	-977.425	0.89538
TCGA-2Y-A9GZ	0	0.414183	0.0747014	Dead	T2	NX	MX	Stage II	G2	WITH TUMOR	-349.297	998.883	649.587	0.764624
TCGA-DD-A73A	0.0289756	3.08908	0	Alive	T1	N0	M0	Stage I	G2	TUMOR FREE	-771.549	180.3	-591.249	0.868713
TCGA-G3-A7M5	0.0831796	0.724489	0.0100178	Alive	T1	NX	MX	Stage I	G2	TUMOR FREE	-302.734	559.756	257.022	0.800471
TCGA-DD-A1E9	#N/A	#N/A	#N/A	Dead	T1	N0	M0	Stage I	G2	#N/A	304.027	1782.07	2086.1	0.612796
TCGA-BC-A3KG	0.327833	1.15739	0.410624	Alive	T2	N0	M0	Stage II	G3	WITH TUMOR	-1275.62	-356.877	-1632.5	0.933997
TCGA-CC-A8HS	2.95349	1.25226	1.77183	Dead	T3	N1	M0	Stage IIIC	G1	WITH TUMOR	-789.135	163.254	-625.881	0.87122
TCGA-DD-AACP	0.0556934	1.05749	1.00613	Alive	T1	N0	M0	Stage I	G3	Unknown	-226.859	1629.49	1402.63	0.688863
TCGA-DD-A3A2	0	0.934124	0	Dead	T1	N0	M0	Stage I	G1	TUMOR FREE	-949.252	860.482	-88.7703	0.82985
TCGA-BW-A5NP	0.0833385	0.587957	0.120444	Alive	T2	N0	M1	Stage IV	G3	WITH TUMOR	-956.009	1212.84	256.828	0.800488
TCGA-DD-A4NO	0.112123	1.14846	0.0108029	Alive	T1	N0	M0	Stage I	G1	WITH TUMOR	186.326	1265.29	1451.62	0.683633
TCGA-KR-A7K2	0.0262251	0.895401	0.101071	Alive	T1	N0	M0	Stage I	G1	TUMOR FREE	-1007.68	1766.26	758.58	0.754215
TCGA-DD-A114	0.443849	28.0973	0	Dead	T2		M0	Stage II	G3	TUMOR FREE	360.266	1716.87	2077.14	0.613835
TCGA-RC-A7SB	0.020122	1.31796	0.0193874	Alive	T2	N0	M0	Stage II	G2	TUMOR FREE	-166.542	882.889	716.347	0.758272
TCGA-DD-AACS	0.351443	1.06116	0.244553	Alive	T1	N0	M0	Stage I	G3	TUMOR FREE	-199.901	695.512	495.612	0.778994
TCGA-DD-A73G	0.0185339	0.271201	0.0267859	Alive	T1	N0	M0	Stage I	G3	TUMOR FREE	-1665.88	-908.901	-2574.78	0.974337
TCGA-CC-A7II	0.149997	0.328482	0.299364	Alive	T3	N0	M0	Stage IIIA	G3	WITH TUMOR	-501.062	327.923	-173.139	0.836697
TCGA-CC-A9FU	0.103405	1.6644	1.10589	Alive	T3a	N0	M0	Stage IIIA	G2	TUMOR FREE	140.133	1481.38	1621.51	0.665221
TCGA-5R-AA1C	0	2.14581	0	Alive	T2	N0	M0	Stage II	G2	TUMOR FREE	84.8611	1908.09	1992.95	0.623543
TCGA-DD-A3A4	0	0.0784267	0.0120494	Dead	T3	N0	M0	Stage IIIA	G3	WITH TUMOR	-706.636	479.006	-227.63	0.841051
TCGA-G3-A25W	#N/A	#N/A	#N/A	Alive	T3b	N0	M0	Stage IIIB	G2	#N/A	-423.409	416.065	-7.34319	0.823122
TCGA-O8-A75V	0.0696736	2.45775	0	Alive	T1	NX	MX	Stage I	G2	TUMOR FREE	-397.373	952.156	554.783	0.773518
TCGA-DD-AAVU	0	0.123581	0.0106801	Alive	T2	N0	M0	Stage II	G2	TUMOR FREE	-1607.08	-492.656	-2099.73	0.956286
TCGA-ZS-A9CD	0.129998	1.14133	0.0626258	Dead	T2	NX	MX	Stage II	G2	Unknown	-713.666	817.475	103.81	0.813748
TCGA-2Y-A9H1	0.0236624	1.13766	0	Dead	T1	NX	MX	Stage I	G2	WITH TUMOR	-695.096	20.6693	-674.427	0.874695
TCGA-DD-A3A3	0.0230601	0.449908	0.0333273	Dead	T1	N0	M0	Stage I	G2	Unknown	-1636.45	-107.131	-1743.58	0.939698
TCGA-G3-AAV4	0.029658	1.08494	0.128589	Dead	T1	N0	M0	Stage I	G1	TUMOR FREE	-282.09	948.354	666.264	0.763044
TCGA-DD-A1EK	6.04478	1.76733	0.248768	Dead	T4	N0	M1	Stage IVB	G2	WITH TUMOR	127.515	1125.5	1253.01	0.704616
TCGA-DD-AAE1	0.0310075	1.94453	0.104564	Alive	T1	N0	M0	Stage I	G3	TUMOR FREE	-1241.14	-3.45844	-1244.6	0.912151
TCGA-2Y-A9H8	0.0491578	6.43098	0.272338	Dead	T1	NX	MX		G2	WITH TUMOR	-213.694	1535.26	1321.57	0.697439
TCGA-DD-AA3A	0	0.628041	0.0554312	Dead	T1	N0	MX	Stage I	G4	TUMOR FREE	-599.192	613.18	13.9885	0.82134
TCGA-EP-A3JL	0.0448555	5.6181	0.0108045	Alive	T1	NX	MX	Stage I	G2	TUMOR FREE	21.6713	1323.65	1345.32	0.694937
TCGA-5C-AAPD	0.0266628	11.9088	0.141291	Alive	T2	N0	M0	Stage II	G1	TUMOR FREE	-660.988	1826.8	1165.82	0.71364
TCGA-DD-A1EL	0.0310291	1.32968	0.127059	Dead	T2	N0	M0	Stage II	G3	WITH TUMOR	-1358.02	-595.097	-1953.12	0.949771
TCGA-G3-AAV5	0.0175615	0.770915	0.0338407	Alive	T2	N0	M0	Stage II	G2	WITH TUMOR	-1586.31	156.068	-1430.24	0.922979
TCGA-2Y-A9H3	0.191464	3.75775	0.169101	Alive	T2	NX	MX	Stage II	G1	TUMOR FREE	-90.2713	1413.51	1323.24	0.697263
TCGA-BD-A2L6	0.0162784	2.03601	0	Alive	T2	NX	MX		G2	WITH TUMOR	200.284	1177.62	1377.91	0.691489
TCGA-DD-AAEI	0	1.0492	0.031769	Alive	T1	N0	M0	Stage I	G2	WITH TUMOR	-566.132	107.721	-458.411	0.85889
TCGA-DD-A73D	0.0248337	0.138432	0	Alive	T2	NX	MX	Stage II	G1	WITH TUMOR	-1138.03	-105.212	-1243.25	0.912069
TCGA-BC-A10T	0	1.02133	0.0344451	Dead	T4	NX	MX		G1	WITH TUMOR	-686.813	250.601	-436.212	0.857217
TCGA-G3-A3CG	0.142163	3.78404	0.0136973	Alive	T1	N0	M0	Stage I	G2	WITH TUMOR	-265.484	994.882	729.398	0.757021
TCGA-5C-A9VG	0.0808009	0.722537	1.24561	Alive	T2	N0	M0	Stage II	G2	TUMOR FREE	-163.43	890.929	727.5	0.757203
TCGA-DD-AADJ	0.0582241	0.496985	0.0280492	Alive	T1	N0	M0	Stage I	G3	TUMOR FREE	-644.032	310.617	-333.414	0.849349
TCGA-ED-A82E	0.201696	1.2473	0.121458	Alive	T3a	N0	M0	Stage IIIA	G2	TUMOR FREE	-1311.49	-47.0489	-1358.54	0.918878
TCGA-DD-AAC8	0.0481112	1.32418	0.0231774	Dead	T1	N0	M0	Stage I	G3	TUMOR FREE	-614.734	151.221	-463.513	0.859273
TCGA-G3-A5SM	0.193808	2.94285	0	Alive	T2	NX	M0	Stage II	G3	TUMOR FREE	-386.42	518.455	132.035	0.811332
TCGA-G3-A7M7	0	0.827691	0.0457795	Alive	T1	NX	MX	Stage I	G1	TUMOR FREE	-514.038	602.971	88.933	0.815015
TCGA-DD-AADL	0.0235271	0.852465	0.0340022	Alive	T1	N0	M0	Stage I	G4	TUMOR FREE	-1212.35	-241.575	-1453.92	0.924312
TCGA-DD-AAC9	0.138715	1.18404	0	Alive	T1	N0	M0	Stage I	G2	TUMOR FREE	119.074	1039.18	1158.25	0.714417
TCGA-DD-A4NQ	0.180054	1.81918	0.187937	Dead	T2	N0	M0	Stage II	G3	WITH TUMOR	-1435.44	-3.38484	-1438.83	0.923464
TCGA-CC-A7IK	0.0689309	1.39289	0.520245	Dead	T3	N0	M0	Stage IIIA	G3	WITH TUMOR	-970.83	401.052	-569.778	0.867147
TCGA-RC-A6M3	0	2.16998	0.124504	Alive	T2	N0	M0	Stage II	G3	Unknown	-1420.72	-171.038	-1591.76	0.931844
TCGA-BD-A3ER	0.0252318	1.16916	0.0243106	Alive	T2	NX	MX	Stage II	G2	WITH TUMOR	-900.313	-447.58	-1347.89	0.91826
TCGA-DD-AAD8	0.0346018	1.16935	0.0500079	Alive	T1	N0	M0	Stage I	G2	TUMOR FREE	-626.92	89.9632	-536.957	0.864738
TCGA-DD-AAVW	0.0882909	4.36796	0.283558	Alive	T1	N0	M0	Stage I	G2	TUMOR FREE	-251.217	342.838	91.6213	0.814786
TCGA-BW-A5NQ	0	18.2931	0.0324708	Alive	T1	NX	MX	Stage I	G3	TUMOR FREE	-726.527	313.764	-412.763	0.855439
TCGA-G3-A3CK	0.0172798	6.81493	0.0416225	Alive	T1	N0	M0	Stage I	G2	TUMOR FREE	-1012.93	825.415	-187.517	0.837851
TCGA-DD-AADM	0	0.643432	0.0195539	Dead	T2	N0	M0	Stage II	G3	TUMOR FREE	500.279	1105.16	1605.44	0.666981
TCGA-DD-A73F	0.0848678	22.3606	0.0306635	Alive	T1	N0	M0	Stage I	G1	TUMOR FREE	169.094	1149.98	1319.07	0.697702
TCGA-BC-A10R	0.062714	1.28911	0.120849	Dead	T3	NX	MX		G2	WITH TUMOR	-885.92	431.423	-454.497	0.858596
TCGA-CC-A8HV	0.0873318	0.669376	0.210359	Dead	T2	N0	M0	Stage II	G2	WITH TUMOR	-1221.86	-806.232	-2028.09	0.953158
TCGA-DD-A4ND	0.434738	12.8174	0.117806	Alive	T1	N0	M0	Stage I	G3	TUMOR FREE	-240.923	788.765	547.842	0.774163
TCGA-UB-AA0U	0.082526	4.45653	0.0265044	Alive	T2	NX	MX	Stage II	G2	TUMOR FREE	-274.048	733.387	459.338	0.782321
TCGA-G3-A25Z	0.0169271	0.713582	0	Alive	T1	N0	M0	Stage I	G2	TUMOR FREE	-1175.19	-43.9062	-1219.1	0.91061
TCGA-CC-A3MB	0.0191847	1.24321	0	Dead	T3	N0	M0	Stage IIIA	G1	WITH TUMOR	-1153.52	-131.962	-1285.48	0.914594
TCGA-DD-AACO	0	0.375376	0.0167436	Alive	T1	N0	M0	Stage I	G3	WITH TUMOR	-627.932	511.372	-116.56	0.83212
TCGA-GJ-A6C0	22.995	9.12308	0	Dead	T2	NX	MX	Stage II	G2	Unknown	-594.722	1103.19	508.471	0.777809
TCGA-ZP-A9D2	0.0483261	2.68545	0.0349213	Dead	T2	NX	MX		G2	WITH TUMOR	-1089.98	281.09	-808.891	0.884091
TCGA-DD-A1EJ	0.0147448	2.661	3.06151	Dead	T1	N1	M0	Stage IIIC	G2	WITH TUMOR	-464.135	2187.99	1723.85	0.65393
TCGA-UB-AA0V	0.0715715	2.95483	0.0344792	Alive		NX	MX	Stage I	G1	TUMOR FREE	-301.385	650.866	349.481	0.792263
TCGA-FV-A3R3	0.0496873	2.56202	0.131652	Dead	T1	NX	MX	Stage I	G2	TUMOR FREE	-39.2679	1089.3	1050.03	0.725442
TCGA-3K-AAZ8	0.0212737	1.94928	0.0102485	Alive	T3b	NX	MX	Stage IIIB	G1	WITH TUMOR	-572.728	-11.0594	-583.788	0.86817
TCGA-RG-A7D4	0.0517978	14.5994	1.22271	Alive	T2	N0	M0	Stage II	G2	TUMOR FREE	-1222.01	-299.09	-1521.1	0.92803
TCGA-2Y-A9HB	0.0415728	6.19908	0	Alive	T1	NX	MX	Stage I	G2	TUMOR FREE	-308.571	474.911	166.34	0.808378
TCGA-DD-AACT	0	2.12648	0.0621208	Alive	T1	N0	M0	Stage I	G2	TUMOR FREE	-909.769	540.468	-369.3	0.852118
TCGA-DD-A116	0	0.606508	0.300256	Dead	T3	N0	M0	Stage IIIA	G3	TUMOR FREE	-421.618	46.9992	-374.618	0.852526
TCGA-LG-A9QD	0	5.76598	0.0184986	Alive	T3a	N0	M0	Stage IIIA	G2	WITH TUMOR	-1510.01	-672.101	-2182.11	0.959752
TCGA-G3-A7M9	0.621825	1.62883	8.35443	Dead	T3b	NX	MX	Stage IIIB	G2	Unknown	-703.825	1249.83	546.006	0.774334
TCGA-K7-A5RF	0.0449771	3.57274	0.0216675	Alive	T1	NX	MX	Stage I	G1	TUMOR FREE	1184.88	1028.79	2213.67	0.597891
TCGA-DD-AACZ	0.221845	36.2319	0	Dead	T1	N0	M0	Stage I	G4	TUMOR FREE	-811.961	-369.776	-1181.74	0.90833
TCGA-CC-A5UD	0.0316269	1.38836	0.350431	Dead	T3	N0	M0	Stage IIIA	G2	WITH TUMOR	-1436.26	-661.186	-2097.45	0.956188
TCGA-NI-A4U2	0.0643213	0.463127	0.00516442	Dead	T3	NX	MX	Stage IIIA	G1	WITH TUMOR	-168.095	223.793	55.6972	0.817832
TCGA-G3-AAV6	0.0633806	0.618286	0.753156	Dead	T3a	N0	M0	Stage IIIA	G3	WITH TUMOR	143.536	1488.51	1632.04	0.664066
TCGA-FV-A23B	0.243859	5.11067	0.0180736	Dead	T2	N0	M0	Stage II	Not Available	WITH TUMOR	-159.986	1111.91	951.922	0.735279
TCGA-DD-AAVY	0.0450862	0.612609	0	Alive	T3	N0	M0	Stage IIIA	G2	TUMOR FREE	-1161.14	1202.42	41.2794	0.819048
TCGA-CC-5262	0.437099	3.07774	0.0110826	Dead	T4	N0	M0	Stage IIIC	G1	TUMOR FREE	-675.646	78.8789	-596.767	0.869114
TCGA-DD-A4NI	0.0993744	6.19038	0	Alive	T2	NX	M0	Stage II	G2	TUMOR FREE	247.986	1364.46	1612.45	0.666214
TCGA-G3-AAUZ	0	1.50089	0	Alive	T1	N0	M0	Stage I	G2	TUMOR FREE	-760.997	1426.36	665.365	0.763129
TCGA-DD-A39Y	0	0.364312	0.0592649	Dead	T1	NX	M0	Stage I	G3	TUMOR FREE	-1086.59	901.014	-185.576	0.837695
TCGA-2Y-A9H6	0.109589	2.19538	0.0659925	Alive	T1	NX	MX	Stage I	G2	Unknown	-1099.32	16.8618	-1082.46	0.902139
TCGA-DD-A119	0.0178089	0.254388	0.0257381	Dead	T3a	N0	M1	Stage IV	G3	Unknown	-836.917	75.7187	-761.198	0.880798
TCGA-G3-A25Y	0.0354085	3.12106	0.170579	Dead	T1	N0	M0	Stage I	G3	WITH TUMOR	-204.609	1524.92	1320.31	0.697571
TCGA-MI-A75C	0.131878	2.38154	0.0211773	Alive	T1	N0	M0	Stage I	G3	TUMOR FREE	-1222.64	530.056	-692.582	0.875984
TCGA-DD-A4NP	0.0567985	0.405663	0.10945	Alive	T1	N0	M0	Stage I	G3	TUMOR FREE	-406.79	328.099	-78.6911	0.829024
TCGA-DD-A3A6	0.033031	2.24405	0.206863	Dead	T2	N0	M0	Stage II	G2	TUMOR FREE	-402.153	153.021	-249.133	0.842754
TCGA-G3-A3CJ	0.0392429	0.293951	0	Alive	T2	N0	M0	Stage II	G2	WITH TUMOR	-1409.93	-567.351	-1977.28	0.950875
TCGA-DD-A3A9	0	1.22691	0	Dead	T4	N0	M1	Stage IVB	G2	WITH TUMOR	-442.749	565.533	122.784	0.812126
TCGA-DD-A1EF	0.122665	4.67249	0.393956	Dead	T1	N0	M0	Stage I	G3	WITH TUMOR	-183.359	931.638	748.279	0.755207
TCGA-K7-A6G5	0.0390033	3.01668	0	Alive	T1	N0	MX	Stage I	G2	TUMOR FREE	-730.442	193.068	-537.374	0.864769
TCGA-KR-A7K0	0.102202	1.0237	0.0123088	Dead	T1	N0	M0	Stage I	G1	TUMOR FREE	-1024.23	-252.282	-1276.52	0.914061
TCGA-DD-A11D	0	0.636937	0.0374776	Dead	T1	N0	M0	Stage I	G2	WITH TUMOR	-1339.24	-126.963	-1466.2	0.924998
TCGA-ZP-A9D1	0.10706	1.79038	0.0386819	Alive	T1	NX	MX		G2	TUMOR FREE	-1183.84	293.629	-890.208	0.889606
TCGA-ZS-A9CG	0.0514842	0.493267	0.173616	Alive	T2	NX	MX	Stage II	G2	TUMOR FREE	-1293.1	-449.356	-1742.46	0.939642
TCGA-CC-A8HU	0.156912	0.537566	4.45991	Dead	T3	N0	M0	Stage IIIA	G3	WITH TUMOR	-338.947	340.225	1.27818	0.822403
TCGA-EP-A2KB	0.0328787	1.02521	0.00791957	Dead	T1	NX	MX	Stage I	G2	WITH TUMOR	16.8276	1161.11	1177.94	0.712393
TCGA-DD-AADU	0.101925	0.435003	0.0859284	Alive	T2	N0	M0	Stage II	G3	TUMOR FREE	-726.174	195.474	-530.7	0.864276
TCGA-XR-A8TD	0.110356	29.9989	0.106327	Alive	T3	N0	M0	Stage IIIB	G3	TUMOR FREE	-1014.46	11.0438	-1003.41	0.897072
TCGA-CC-A7IL	0.0522198	0.321414	0.0419278	Dead	T3	N0	M0	Stage IIIA	G1	WITH TUMOR	36.4209	1507.2	1543.62	0.673715
TCGA-CC-5261	3.10015	6.69126	0.637463	Dead	T2	N0	M0	Stage II	G2	TUMOR FREE	-774.63	-214.972	-989.603	0.896175
TCGA-RC-A6M5	0.0206824	0.792626	0.0298909	Alive	T1	N1	M0	Stage IVA	G2	Unknown	-264.031	926.297	662.266	0.763423
TCGA-DD-AACI	0.119548	6.66404	0	Alive	T2	N0	M0	Stage II	G3	WITH TUMOR	-1154.33	1538.88	384.545	0.789112
TCGA-DD-AADF	0	3.00788	0.0589113	Dead	T1	N0	M0	Stage I	G4	TUMOR FREE	-765.805	-114.822	-880.627	0.888963
TCGA-G3-A3CI	0.178539	1.75944	0	Alive	T1	N0	M0	Stage I	G2	TUMOR FREE	-1038.15	-72.1218	-1110.27	0.903893
TCGA-DD-AACV	0	0.349328	0	Alive	T1	N0	M0	Stage I	G3	WITH TUMOR	-1063.12	446.38	-616.74	0.87056
TCGA-CC-5264	0.053541	1.85914	0.120368	Dead	T3	N0	M0	Stage IIIA	G2	TUMOR FREE	-1088.65	-255.839	-1344.49	0.918062
TCGA-CC-A9FS	0.122155	2.21304	0.258929	Alive	T2	N0	M0	Stage II	G2	WITH TUMOR	-847.686	627.147	-220.54	0.840487
TCGA-ED-A5KG	0.479251	54.8643	0.0814859	Alive	T2	N0	M0	Stage II	G2	WITH TUMOR	-136.658	452.435	315.777	0.795272
TCGA-WQ-A9G7	0.106822	0.533436	1.16645	Alive	T3a	NX	M0		G3	TUMOR FREE	-253.079	394.877	141.798	0.810494
TCGA-CC-5263	0.350234	4.7344	1.03484	Dead	T3	N0	M0	Stage IIIA	G1	TUMOR FREE	145.58	553.615	699.196	0.75991
TCGA-LG-A6GG	0	0.592919	0.0204964	Alive	T2	NX	M0	Stage II	G2	TUMOR FREE	-233.69	636.418	402.728	0.78747
TCGA-DD-AAVQ	0.0807226	11.0666	0.233326	Alive	T1	N0	M0	Stage I	G2	TUMOR FREE	-545.085	-19.9664	-565.051	0.866802
TCGA-ED-A8O6	0.0229835	1.69757	2.30302	Dead	T3a	N0	M0	Stage IIIA	G3	TUMOR FREE	8.37085	748.956	757.327	0.754336
TCGA-DD-AACB	0.107354	28.2009	0.172391	Alive	T1	N0	M0	Stage I	G3	TUMOR FREE	-7.399	702.88	695.481	0.760265
TCGA-BC-A10Q	0.122482	1.09882	0.044254	Dead	T2	NX	MX		Not Available	WITH TUMOR	29.7949	1120.83	1150.63	0.7152
TCGA-BC-A69I	0.0455587	0.27777	0.0219477	Alive	T1	N0	M0	Stage I	G1	TUMOR FREE	-859.886	1408.79	548.899	0.774065
TCGA-DD-A39V	0.0229478	5.56449	0.02211	Dead	T2	NX	M0	Stage II	G3	WITH TUMOR	-139.519	1019.11	879.594	0.742433
TCGA-DD-AACW	0.0796478	1.4152	0.1279	Alive	T1	N0	M0	Stage I	G3	TUMOR FREE	-922.613	-328.277	-1250.89	0.912529
TCGA-ED-A459	0	1.22188	0.0839528	Alive	T2	N0	M0	Stage II	G2	TUMOR FREE	-215.857	583.337	367.48	0.790648
TCGA-BC-4072	#N/A	#N/A	#N/A	Dead	T3	N0	M0	Stage IIIA	G3	#N/A	-989.443	-750.738	-1740.18	0.939527
TCGA-MI-A75H	0.188281	5.61319	0	Alive		NX	MX		Not Available	WITH TUMOR	-1022.56	-480.905	-1503.47	0.927063
TCGA-DD-AACU	0.0261657	2.51604	0.0882366	Alive	T1	N0	M0	Stage I	G3	TUMOR FREE	758.38	1462.89	2221.27	0.596997
TCGA-DD-A113	0.0179885	3.94205	1.69852	Alive	T2	N0	M0	Stage II	G3	WITH TUMOR	715.417	1717.96	2433.38	0.571733
TCGA-G3-A25U	0.165215	0.805847	0.0113702	Alive	T1	N0	M0	Stage I	G3	TUMOR FREE	-1284.66	-381.287	-1665.94	0.93574
TCGA-BC-A8YO	0.248004	27.3554	0.167264	Alive	T4	N0	M0	Stage IIIC	G3	WITH TUMOR	-257.947	2516.85	2258.9	0.592556
TCGA-DD-AADE	#N/A	#N/A	#N/A	Alive	T1	N0	M0	Stage I	G4	#N/A	-136.844	1132.59	995.745	0.730904
TCGA-ES-A2HS	0	0.142437	0.0171265	Dead	T1	NX	MX	Stage I	G2	TUMOR FREE	-470.538	159.476	-311.062	0.847612
TCGA-RC-A6M6	0	1.5444	0.599628	Alive	T2	NX	M0	Stage II	G3	Unknown	-1027.51	110.257	-917.253	0.891412
TCGA-ZP-A9CV	0.238019	4.06334	0.0509621	Dead	T1	NX	MX		G1	WITH TUMOR	-1010.63	618.874	-391.752	0.853838
TCGA-CC-A7IE	0.1103	9.04981	2.32471	Dead	T3	N0	M0	Stage IIIA	G2	WITH TUMOR	-515.025	172.087	-342.938	0.850086
TCGA-G3-A25T	0.169583	0.465272	0.408478	Alive	T3	N0	M0	Stage IIIA	G2	WITH TUMOR	-1150.5	67.2839	-1083.22	0.902187
TCGA-EP-A2KC	0.0629701	1.62346	0.0101119	Dead	T1	NX	MX	Stage I	G3	TUMOR FREE	-837.936	64.9713	-772.965	0.881614
TCGA-KR-A7K7	0	2.20633	0.0183783	Alive	T2	N0	M0	Stage II	G1	WITH TUMOR	-1035.1	864.061	-171.041	0.836528
TCGA-CC-A7IJ	0	58.3251	0.231816	Alive	T2	N0	M0	Stage II	G3	TUMOR FREE	-1070.59	700.332	-370.255	0.852191
TCGA-DD-AACD	0.0241447	0.807548	0.0348948	Dead	T1	N0	M0	Stage I	G4	WITH TUMOR	-851.809	118.032	-733.778	0.878885
TCGA-DD-AAVX	0.149819	14.9935	0	Alive	T2	N0	M0	Stage II	G2	WITH TUMOR	328.112	200.148	528.259	0.77598
TCGA-DD-AAD5	1.39913	1.23436	0.119585	Alive	T1	N0	M0	Stage I	G3	WITH TUMOR	-1058.96	-210.181	-1269.14	0.913622
TCGA-G3-A5SL	0.0209793	0.657822	0.0202134	Alive	T2	NX	M0	Stage II	G2	TUMOR FREE	100.9	185.316	286.216	0.797896
TCGA-DD-AACC	0.232751	27.0209	0	Dead	T1	N0	M0	Stage I	G2	WITH TUMOR	-1206.78	-385.532	-1592.31	0.931873
TCGA-MI-A75I	0.13039	1.24925	0	Alive	T2	NX	MX		G1	Unknown	-869.075	915.595	46.5202	0.818606
TCGA-DD-A39W	0.100073	1.42075	0.988297	Dead	T3	N0	M0	Stage III	G2	Unknown	210.925	812.512	1023.44	0.728124
TCGA-WX-AA47	0	0.11536	0.0478541	Dead	T3a	NX	MX	Stage IIIA	G2	WITH TUMOR	-840.606	1459.19	618.583	0.767549
TCGA-2Y-A9HA	0.0576688	1.40642	1.19461	Dead	T2	NX	MX	Stage II	G2	WITH TUMOR	-296.953	652.528	355.574	0.791717
TCGA-FV-A3R2	0.0671879	1.85704	0.0431566	Dead	T1	NX	MX	Stage I	Not Available	TUMOR FREE	-739.494	419.425	-320.068	0.848313
TCGA-ES-A2HT	0.0144396	0.809947	0	Dead	T1	NX	MX	Stage I	G2	TUMOR FREE	-1004.63	353.205	-651.424	0.873054
TCGA-DD-A4NF	0	0.307145	1.16169	Alive	T1	N0	M0	Stage I	G2	WITH TUMOR	-1336	-296.835	-1632.83	0.934014
TCGA-CC-A7IF	0	0.631773	0.89819	Dead	T3	N0	M0	Stage IIIA	G1	WITH TUMOR	-642.024	1246.16	604.14	0.768906
TCGA-CC-A1HT	0.327276	58.602	0.0225234	Dead	T3	N0	M0	Stage IIIA	G3	TUMOR FREE	-266.604	1182.33	915.725	0.73887
TCGA-DD-A4NS	0.46198	8.29379	0.0523663	Dead	T1	N0	M0	Stage I	G2	WITH TUMOR	534.161	3210.43	3744.6	0.404238
TCGA-DD-AACQ	0	0.379162	0.009709	Dead	T2	N0	M0	Stage II	G3	WITH TUMOR	-1239.86	-254.868	-1494.73	0.926581
TCGA-DD-AACN	0.0873779	2.5673	0.196438	Alive	T1	N0	M0	Stage I	G3	WITH TUMOR	-207.869	1235.53	1027.66	0.727698
TCGA-ZS-A9CE	0.0484551	0.337632	0.031124	Alive	T2	NX	MX	Stage II	G1	TUMOR FREE	-1451.21	-753.183	-2204.39	0.960665
TCGA-K7-AAU7	0.8313	3.70213	0.0522359	Alive	T2a	NX	MX	Stage II	G2	WITH TUMOR	-1214.43	-428.692	-1643.12	0.934553
TCGA-ED-A7XO	0.197245	1.56092	0.0407236	Alive	T3a	N0	M0	Stage IIIA	G2	WITH TUMOR	-205.203	1179.57	974.364	0.733042
TCGA-DD-A3A0	#N/A	#N/A	#N/A	Dead	T1	NX	M0	Stage I	G2	#N/A	-911.217	351.449	-559.768	0.866415
TCGA-BC-A216	0.0691935	7.54544	0.0111112	Alive	T3	NX	M0	Stage IIIA	G2	TUMOR FREE	-93.1589	861.606	768.447	0.753264
TCGA-DD-A11B	0.0218731	0.723951	0.0210746	Dead	T1	N0	M0	Stage I	G2	TUMOR FREE	606.159	1158.07	1764.23	0.649434
TCGA-DD-A1EH	0.121958	1.92621	0.0293764	Alive	T3	N0	M0	Stage III	G3	WITH TUMOR	-197.697	942.835	745.138	0.75551
TCGA-DD-AAED	0.0364334	1.18048	0	Alive	T1	N0	M0	Stage I	G3	WITH TUMOR	-192.957	786.467	593.511	0.769903
TCGA-DD-AACX	0.0549758	2.44206	0.0529687	Alive	T2	N0	M0	Stage II	G3	WITH TUMOR	-422.033	387.997	-34.0361	0.825341
TCGA-DD-A1EA	0.0916549	8.63237	0.0735906	Alive	T2	N0	M0	Stage II	G2	WITH TUMOR	-562.036	227.712	-334.325	0.849419
TCGA-DD-A4NN	0	0.217345	0.248718	Dead	T1	N0	M0	Stage I	G3	WITH TUMOR	-1050.22	-420.713	-1470.93	0.925262
TCGA-ED-A8O5	0.086908	1.25656	0.198871	Alive	T3a	N0	M0	Stage IIIA	G3	TUMOR FREE	-1112.99	-225.475	-1338.46	0.917711
TCGA-DD-AAEG	0.26579	0.271188	0.0823136	Alive	T1	N0	M0	Stage I	G3	TUMOR FREE	-996.093	-415.401	-1411.49	0.921917
TCGA-DD-A4NR	0.274019	30.3666	0.0220012	Dead	T1	N0	M0	Stage I	G3	TUMOR FREE	-199.393	1003.99	804.595	0.749763
TCGA-BC-A10X	0.126565	2.07245	0.0174205	Dead	T3a	N0	MX	Stage IIIA	G2	TUMOR FREE	-259.465	231.164	-28.3011	0.824865
TCGA-HP-A5N0	0.0241532	1.1276	0.0232714	Dead	TX	NX	M0		Not Available	WITH TUMOR	-995.92	455.826	-540.094	0.864969
TCGA-G3-A5SI	0.027154	0.132446	0.0523254	Dead	T2	N0	M0	Stage II	G2	WITH TUMOR	-871.713	545.697	-326.017	0.848775
TCGA-CC-A3M9	0.0464318	91.2851	0.0111841	Dead	T3	N0	M0	Stage IIIA	G3	WITH TUMOR	628.231	1583.76	2211.99	0.598089
TCGA-DD-A3A8	0.0234782	0.548043	0.384558	Dead	T2	N0	M0	Stage II	G2	TUMOR FREE	-397.932	24.4191	-373.513	0.852441
TCGA-ED-A97K	0.537959	3.11715	0.2728	Alive	T3a	N0	M0	Stage IIIA	G2	TUMOR FREE	-458.324	1191.48	733.156	0.756661
TCGA-ED-A7PZ	0	0.107458	0.185734	Alive	T2	NX	M0	Stage II	G2	TUMOR FREE	-174.905	1026.32	851.419	0.745197
TCGA-FV-A4ZP	0.227246	1.56904	0	Dead	T3	NX	M0	Stage IIIA	G2	TUMOR FREE	-388.656	959.738	571.082	0.772
TCGA-G3-AAV0	0	0.648078	0	Alive	T1	N0	M0	Stage I	G2	TUMOR FREE	-797.703	308.296	-489.407	0.861211
TCGA-DD-AADP	0.128624	1.92693	0.074357	Alive	T1	N0	M0	Stage I	G3	TUMOR FREE	-342.667	257.081	-85.5862	0.82959
TCGA-2V-A95S	0.346343	229.826	0.0333698		T2	NX	MX	Stage II	G3	WITH TUMOR	-907.516	378.119	-529.397	0.86418
TCGA-DD-A1EE	0.13096	1.11784	0.0420595	Dead	T3	N0	M0	Stage IIIA	G3	WITH TUMOR	-1456.23	-35.3466	-1491.58	0.926407
TCGA-DD-A3A5	0	0.563072	0.0239565	Dead	T3	N0	M0	Stage III	G2	WITH TUMOR	-852.986	-245.969	-1098.95	0.903181
TCGA-DD-AAE8	#N/A	#N/A	#N/A	Alive	T1	N0	M0	Stage I	G3	#N/A	-1020.15	298.727	-721.423	0.878018
TCGA-DD-A4NV	0.0425264	1.44457	0.0204869	Alive	T3	N0	M0	Stage IIIA	G1	TUMOR FREE	818.748	1950.73	2769.47	0.530578
TCGA-DD-AADQ	0.0417678	1.63707	0.0100607	Alive	T2	N0	M0	Stage II	G3	TUMOR FREE	-1359.48	201.455	-1158.03	0.906869
TCGA-DD-A39Z	0.0509116	0.274931	0.0122632	Dead	T2	NX	M0	Stage II	G2	TUMOR FREE	-1538.51	-767.421	-2305.93	0.964697
TCGA-DD-AADI	0.0793856	3.36502	0.0254958	Alive	T1	N0	M0	Stage I	G3	TUMOR FREE	-61.9582	1949.06	1887.1	0.635614
TCGA-CC-A3MA	0.357615	1.00632	0.0265045	Dead	T3	N0	M0	Stage IIIA	G2	WITH TUMOR	43.6836	987.145	1030.83	0.727379
TCGA-DD-AADC	0.0391322	2.1132	2.31877	Dead	T1	N0	M0	Stage I	G3	WITH TUMOR	-344.132	2030.7	1686.57	0.658061
TCGA-2Y-A9GS	0.0502201	4.59285	0	Dead	T2	NX	MX		G2	WITH TUMOR	-1365.9	574.587	-791.312	0.882882
TCGA-UB-A7MD	0.167036	3.27554	0.0344866	Dead	T1	N0	MX	Stage I	G3	TUMOR FREE	-2.04641	1777.08	1775.03	0.648228
TCGA-CC-A9FV	0.322262	10.9655	0.172498	Alive	T3	N0	M0	Stage IIIA	G2	TUMOR FREE	-548.012	1789.2	1241.19	0.705846
TCGA-DD-A4NH	6.01149	4.41021	0.0765465	Alive	T3b	N0	M0	Stage IIIB	G3	WITH TUMOR	-573.82	-393.678	-967.498	0.89473
TCGA-DD-AADW	0.0217683	1.45613	0.104868	Alive	T1	N0	M0	Stage I	G3	TUMOR FREE	-291.224	1040.87	749.647	0.755076
TCGA-DD-A1EC	0.189192	64.6982	0.0303808	Alive	T1	N0	M0	Stage I	G3	Unknown	-1249.02	-4.87534	-1253.89	0.912709
TCGA-T1-A6J8	0	0.396522	0.00898836	Alive	T1	NX	M0		G2	TUMOR FREE	-1543.62	-553.583	-2097.2	0.956177
TCGA-DD-AAE6	0	0.195048	0.0224752	Alive	T1	N0	M0	Stage I	G2	WITH TUMOR	-1499.83	39.1827	-1460.65	0.924688
TCGA-UB-A7MC	0.141751	1.16674	0.503624	Alive	T3a	N0	MX	Stage IIIA	G3	WITH TUMOR	-1319.35	-680.225	-1999.58	0.951883
TCGA-2Y-A9GX	0.419641	11.1796	0.0673868	Alive	T1	NX	MX	Stage I	G2	WITH TUMOR	-574.175	287.507	-286.668	0.845707
TCGA-CC-5258	0.263284	4.69775	1.19588	Dead	T2	N0	M0	Stage II	G2	TUMOR FREE	-1584.47	-689.94	-2274.41	0.963469
TCGA-GJ-A3OU	0.767325	23.4292	0	Alive	T1	NX	MX	Stage I	G2	TUMOR FREE	-1330.84	-21.7792	-1352.62	0.918535
TCGA-DD-AAE4	0	6.06596	0	Alive	T1	N0	M0	Stage I	G1	WITH TUMOR	-862.894	230.06	-632.834	0.87172
TCGA-EP-A2KA	0.218577	6.29982	0	Dead	T3a	NX	MX	Stage IIIA	G3	WITH TUMOR	-28.2468	508.781	480.534	0.780379
TCGA-ED-A7PY	0	0.741073	0.136629	Alive	T2	NX	M0	Stage II	G3	TUMOR FREE	576.259	1239.75	1816.01	0.643636
TCGA-DD-AAVZ	0.134198	1.1034	0.0129299	Alive	T1	N0	M0	Stage I	G2	TUMOR FREE	519.055	2942.75	3461.81	0.441847
TCGA-FV-A495	0.0218002	1.13927	0	Alive	T2	NX	M0	Stage II	G2	TUMOR FREE	9.77022	370.921	380.691	0.78946
TCGA-GJ-A9DB	0.0535799	1.34403	0.0774357	Dead	T1	N0	MX	Stage I	G2	Unknown	59.262	599.575	658.837	0.763748
TCGA-BC-A10S	0.0182664	1.31734	0.0703981	Dead	T3	NX	MX		G1	WITH TUMOR	5.51892	905.767	911.286	0.739309
TCGA-WJ-A86L	0.0320306	0.948546	0.447487	Alive	T1	NX	MX	Stage I	G2	TUMOR FREE	-1129.92	796.38	-333.537	0.849358
TCGA-G3-A6UC	0.0505337	0.48416	0.182583	Alive	T3b	N0	M0	Stage IIIB	G2	WITH TUMOR	-1683.34	-319.457	-2002.8	0.952028
TCGA-G3-A3CH	0	1.94421	0.309718	Alive	T3a	N0	M0	Stage IIIA	G2	WITH TUMOR	-573.327	619.086	45.7587	0.818671
TCGA-CC-A7IG	0	0.688413	0.194266	Dead	T2	N0	M0	Stage II	G2	WITH TUMOR	-863.554	331.589	-531.966	0.86437
TCGA-DD-AAE3	0.0613147	0.523366	0.118152	Alive	T1	N0	M0	Stage I	G2	TUMOR FREE	-770.353	-90.173	-860.526	0.887607
TCGA-DD-A4NL	0	0.732286	0.0394506	Alive	T1	N0	M0	Stage I	G1	TUMOR FREE	-973.423	366.419	-607.004	0.869856
TCGA-BD-A3EP	0.23584	4.94823	0	Alive	T1	N0	M0	Stage I	G2	TUMOR FREE	-388.861	490.049	101.188	0.813971
TCGA-CC-5260	1.24086	5.63548	0.320238	Dead	T4	N0	M0	Stage IIIC	G1	TUMOR FREE	-228.872	2452.51	2223.64	0.596718
TCGA-DD-A3A7	0.164824	0.210555	0	Dead	T3b	N0	M0	Stage IIIB	G3	WITH TUMOR	34.7348	1461.03	1495.76	0.678889
TCGA-BC-A112	0.140874	0.834361	0.0271461	Dead	T3	NX	MX		G2	TUMOR FREE	-975.412	917.843	-57.569	0.827286
TCGA-DD-AAEH	0.0272773	12.9721	0.0131407	Alive	T1	N0	M0	Stage I	G2	TUMOR FREE	-1304.3	-430.461	-1734.76	0.939254
TCGA-CC-A7IH	0.0449452	0.861233	0.324782	Alive	T3	N0	M0	Stage IIIA	G1	TUMOR FREE	-436.418	723.753	287.336	0.797796
TCGA-QA-A7B7	0	1.50931	0.053059	Alive	T2	NX	MX	Stage II	G2	WITH TUMOR	-1253.94	-540.113	-1794.05	0.942206
TCGA-DD-AAEA	0	6.66387	0.0467739	Alive	T1	N0	M0	Stage I	G3	TUMOR FREE	-1311.32	38.3043	-1273.02	0.913853
TCGA-DD-A118	0.0185477	1.05976	0.0536115	Alive	T2	N0	M0	Stage II	G2	Unknown	-284.793	1149.05	864.259	0.743939
TCGA-DD-A1ED	0.200781	2.15101	0.0161209	Alive	T1	N0	M0	Stage I	G1	TUMOR FREE	-862.798	-268.061	-1130.86	0.905181
TCGA-EP-A26S	0	0.809612	0.0289523	Alive	T1	N0	MX	Stage I	G2	TUMOR FREE	-131.135	1496.43	1365.29	0.692825
TCGA-DD-AADR	0	2.09849	0	Alive	T1	N0	M0	Stage I	G3	TUMOR FREE	-335.41	1043.55	708.142	0.759056
