# Supplementary material for: Identification of Prognostic Genes in the Tumor Microenvironment of Hepatocellular Carcinoma
Source: Front Immunol. 2021 Apr 7;12:653836. doi: 10.3389/fimmu.2021.653836 (PMC8059369; doi:10.3389/fimmu.2021.653836)
Supplement: Supplementary Table 4 — The results of univariate COX regression analysis. [file Table_4.XLSX]

## Sheet: Sheet1
id	HR	HR.95L	HR.95H	pvalue
FGR	1.01004	0.98908	1.03144	0.350454
CD38	1.00335	0.983171	1.02395	0.746773
CAMKK1	1.0535	0.9729	1.14078	0.199337
HSPB6	1.00001	0.999669	1.00035	0.956919
MEOX1	0.954829	0.857698	1.06296	0.398408
ITGA3	1.00783	1.00185	1.01385	0.0102374
ASB4	0.961716	0.894207	1.03432	0.29315
CCL26	1.01016	0.988821	1.03196	0.353426
MMP25	0.928427	0.795708	1.08328	0.345394
TRAF3IP3	0.925334	0.806334	1.0619	0.269212
STAB1	1.00776	1.00135	1.01421	0.0175171
CD4	1.00029	0.994921	1.00569	0.915887
BTK	1.00719	0.960893	1.05571	0.765503
MRC2	1.00101	0.996806	1.00524	0.637045
PLAUR	1.0064	1.00084	1.01198	0.0239114
DCN	0.99721	0.991585	1.00287	0.332946
TYROBP	1.00115	1.00013	1.00217	0.0264475
CD22	0.967783	0.889774	1.05263	0.445035
LTF	0.984732	0.961556	1.00847	0.205451
ALOX5	1.00359	0.996028	1.01122	0.352829
GPRC5A	1.01163	0.956524	1.06991	0.685735
CD6	0.955015	0.897167	1.01659	0.1488
WAS	1.00048	0.984799	1.0164	0.952826
MARCO	1.00374	0.996319	1.01122	0.324031
RUNX3	0.994522	0.960943	1.02927	0.753954
BIRC3	1.00124	0.998243	1.00425	0.417828
SLAMF7	0.998828	0.981309	1.01666	0.896617
SH2D2A	1.00047	0.969696	1.03223	0.976363
POU2F2	1.0393	0.960339	1.12476	0.338981
STAP1	0.946631	0.793227	1.1297	0.543176
VCAN	1.00224	0.996029	1.00849	0.480709
MSR1	1.03365	1.00754	1.06045	0.0112454
TNC	1.00234	0.997876	1.00683	0.30449
ADAM28	1.04602	0.988577	1.10679	0.118459
LCP2	1.0091	0.985084	1.0337	0.46102
EPHA3	0.992082	0.959421	1.02586	0.64164
TNFRSF17	0.938198	0.854448	1.03016	0.181163
CELF2	0.984775	0.944211	1.02708	0.474686
ELN	0.997857	0.993457	1.00228	0.341544
PTGER3	1.03093	0.939592	1.13115	0.519864
LY75	0.985168	0.851562	1.13973	0.840726
PRDM1	1.00025	0.941692	1.06245	0.993459
TBXAS1	1.03381	1.00456	1.0639	0.0231496
STYK1	1.13276	0.95395	1.34509	0.154988
GNA15	1.03735	1.00662	1.06903	0.0168609
CDH3	0.916395	0.708982	1.18449	0.504881
TSPAN32	0.88179	0.692311	1.12313	0.308105
WISP2	0.996682	0.982526	1.01104	0.648856
NGFR	0.994896	0.982533	1.00742	0.422575
CHI3L2	1.00099	0.958611	1.04525	0.964182
DGKA	0.988753	0.921806	1.06056	0.751854
COL17A1	0.960198	0.751833	1.22631	0.744865
PRKCQ	0.906937	0.779893	1.05468	0.204581
CTNNA2	1.00034	0.984933	1.016	0.96531
CD84	1.00521	0.951157	1.06234	0.853756
SPI1	1.00597	1.00092	1.01106	0.0205735
PYGM	0.986099	0.93757	1.03714	0.586684
DAPP1	0.979737	0.879244	1.09172	0.71083
ST6GALNAC1	0.966584	0.845401	1.10514	0.618994
CDH19	1.01399	0.881341	1.16659	0.846042
ACAP1	0.954624	0.895393	1.01777	0.155344
SIDT1	0.74863	0.532296	1.05289	0.0961546
MRVI1	0.988267	0.958213	1.01926	0.453855
CD5L	0.999413	0.993599	1.00526	0.843608
PTGS2	0.985087	0.85187	1.13914	0.839383
TBX21	0.853049	0.717656	1.01398	0.0714711
ATP2A3	0.979157	0.95106	1.00808	0.156216
IPCEF1	0.83074	0.583876	1.18198	0.302682
ADD2	1.02688	0.856262	1.2315	0.774775
ARHGAP15	0.979041	0.929432	1.0313	0.424638
ICAM3	0.873712	0.720207	1.05994	0.170845
ACTN2	0.997591	0.9898	1.00544	0.546461
CST7	0.995845	0.986167	1.00562	0.403298
FAP	1.02167	0.962757	1.0842	0.479231
P2RY10	0.995933	0.94044	1.0547	0.889197
CDH17	1.00333	0.995512	1.01121	0.405034
LXN	0.995332	0.979694	1.01122	0.562503
MOXD1	0.989262	0.960185	1.01922	0.478137
PTPRC	0.995308	0.979817	1.01104	0.556803
STK17B	1.00662	0.984411	1.02933	0.562192
FYB	1.00504	0.986967	1.02344	0.587282
C1QTNF3	0.999337	0.997642	1.00103	0.44355
EPB41L3	1.0272	0.959643	1.09951	0.439423
COL16A1	1.01387	1.00049	1.02742	0.0421142
FCN1	1.01911	0.961647	1.08001	0.522616
PILRA	1.01561	0.992726	1.03902	0.182821
AQP6	0.964282	0.91569	1.01545	0.167978
CEACAM6	0.998095	0.989027	1.00725	0.682211
ADAMTS2	0.998997	0.987201	1.01093	0.868458
MMP2	1.00062	0.999298	1.00195	0.35723
PTHLH	0.999673	0.993408	1.00598	0.918748
SIGLEC1	1.03345	1.00529	1.06241	0.019603
SIRPG	0.976244	0.927194	1.02789	0.360659
HEPH	0.976477	0.914488	1.04267	0.476877
RGS1	1.0047	0.999959	1.00946	0.0520106
ICAM1	1.00189	0.999875	1.00392	0.0660279
CD209	1.03566	1.01244	1.05942	0.00245966
CCDC80	0.996728	0.986266	1.0073	0.542632
SLC7A8	1.0182	1.0035	1.0331	0.0150356
CECR1	1.00077	0.992379	1.00924	0.857047
GABRP	0.988275	0.96219	1.01507	0.387499
CRTAC1	0.993035	0.956564	1.0309	0.714307
TREM2	1.00603	1.00164	1.01045	0.007121
IL12RB1	1.02521	0.96242	1.0921	0.440016
KCNK6	0.985077	0.931908	1.04128	0.595355
OSM	1.0748	1.00882	1.1451	0.0256433
GGT5	0.998062	0.991648	1.00452	0.555343
CYTH4	1.02537	0.998793	1.05265	0.0615121
CRYBB1	0.99862	0.988523	1.00882	0.789976
APOBEC3H	0.945594	0.836976	1.06831	0.368876
NCF4	1.00974	0.997496	1.02213	0.119462
CSF2RB	1.01675	0.983324	1.05132	0.330029
IL2RB	0.997996	0.979021	1.01734	0.837755
MLC1	0.658481	0.325481	1.33218	0.245162
CTSG	0.979123	0.9493	1.00988	0.181262
GZMH	0.982826	0.960884	1.00527	0.132633
GZMB	0.996021	0.97509	1.0174	0.712897
ASB2	0.950056	0.850276	1.06155	0.365476
TCL1A	0.980662	0.920998	1.04419	0.542049
PLTP	1.00054	0.999783	1.00129	0.162684
SLA2	0.953436	0.877699	1.03571	0.258845
RASSF2	0.996247	0.979386	1.0134	0.665949
SIRPB1	1.15842	0.936218	1.43335	0.175929
MYL9	0.999976	0.999871	1.00008	0.660172
HCK	1.01055	0.999749	1.02146	0.0555968
SYNDIG1	1.01276	0.908559	1.12891	0.818974
MXRA5	1.00657	0.99341	1.01991	0.329365
VSIG1	1.00014	0.994436	1.00587	0.962857
TLR8	1.02302	0.955431	1.09538	0.514049
CHRDL1	1.00023	0.978524	1.02242	0.983487
PAGE4	0.999736	0.998783	1.00069	0.587712
SRPX	1.00048	0.996691	1.00429	0.803126
CD40LG	0.893226	0.79193	1.00748	0.0659668
TIMP1	1.00006	0.999857	1.00026	0.56952
KIAA0226L	1.06711	0.996278	1.14298	0.0638029
TNFSF13B	1.00604	0.987228	1.02522	0.531635
CORO1A	0.999329	0.992927	1.00577	0.837695
CCL22	0.968781	0.882602	1.06337	0.504614
SMPD3	1.00315	0.971828	1.03549	0.84582
WFDC1	0.914322	0.757947	1.10296	0.349294
COTL1	1.00457	0.998658	1.01052	0.129977
CRISPLD2	0.990301	0.976059	1.00475	0.187288
FOXF1	0.96632	0.903548	1.03345	0.317426
XYLT1	1.11739	0.971137	1.28566	0.12096
IL21R	1.03081	0.960602	1.10614	0.399184
IQCH	1.00866	0.949026	1.07204	0.781526
SFRP1	0.995588	0.955204	1.03768	0.834214
WISP1	1.00784	0.979193	1.03732	0.595573
STMN2	0.994882	0.979193	1.01082	0.526946
KCNN4	0.999724	0.934532	1.06946	0.993609
MAP4K1	0.977881	0.937069	1.02047	0.303801
CD37	0.994434	0.976913	1.01227	0.538255
LYL1	1.01347	0.959169	1.07084	0.633979
FCER2	0.94371	0.800145	1.11303	0.491398
LILRB1	1.04676	0.997942	1.09796	0.0607383
LILRA1	1.36651	1.04527	1.78647	0.0223824
RASAL3	0.981076	0.941766	1.02203	0.359829
EBI3	1.02094	0.999917	1.0424	0.0509172
CEACAM4	1.10677	0.8844	1.38504	0.37537
SIGLEC8	0.973522	0.852426	1.11182	0.692141
CD79A	0.989747	0.975981	1.00371	0.149262
CD33	1.14813	1.03666	1.27159	0.0080305
CLEC11A	0.999236	0.994665	1.00383	0.743909
SIGLEC5	1.33288	0.889705	1.99681	0.163531
HAS1	0.991862	0.903912	1.08837	0.863057
LILRB5	1.00078	0.935764	1.0703	0.981936
JAK3	0.994031	0.960375	1.02887	0.733365
HAMP	0.999546	0.998302	1.00079	0.474987
PTN	0.998965	0.992736	1.00523	0.745583
TFEC	1.06411	0.950407	1.19141	0.281154
WNT2	0.977242	0.873004	1.09393	0.689142
VIPR2	0.975248	0.881405	1.07908	0.627305
SFRP4	0.997878	0.98829	1.00756	0.666239
GLI3	1.00254	0.91757	1.09538	0.955234
AEBP1	0.999858	0.99936	1.00036	0.577356
PRUNE2	1.09857	0.918612	1.31379	0.303043
OGN	0.990417	0.967404	1.01398	0.4221
TNFSF8	0.932615	0.802461	1.08388	0.362992
DOCK8	0.991014	0.940684	1.04404	0.734278
GATA3	1.0372	1.00582	1.06956	0.019785
CXCL12	0.997593	0.99223	1.00299	0.380999
SPOCK2	0.991853	0.972443	1.01165	0.417226
RNF43	1.00294	0.995103	1.01085	0.462842
P2RX1	0.831567	0.664978	1.03989	0.10587
ABI3	1.01043	0.99364	1.0275	0.224919
COL1A1	1.00013	0.999719	1.00055	0.529353
SGCA	0.989819	0.938256	1.04422	0.707727
HLF	0.99663	0.993066	1.00021	0.064826
EFNB3	0.986168	0.906252	1.07313	0.746667
PMP22	1.00109	0.995209	1.00702	0.716058
AREG	0.996279	0.980696	1.01211	0.643002
INPP4B	0.931594	0.822146	1.05561	0.266475
SOD3	0.999785	0.997028	1.00255	0.87848
CRTAM	0.976998	0.874934	1.09097	0.679337
MS4A6A	1.00823	0.998716	1.01784	0.0901917
MS4A4A	1.00726	0.996992	1.01763	0.166476
IL10RA	1.00302	0.98286	1.0236	0.770749
SLC1A2	0.992383	0.984981	0.999842	0.0453571
CD5	0.970713	0.925779	1.01783	0.218999
C11orf21	0.81224	0.591825	1.11474	0.19793
POU2AF1	0.985768	0.927462	1.04774	0.644932
CD69	0.946958	0.891855	1.00547	0.0747899
CLEC2B	1.00445	0.987758	1.02142	0.603556
SELPLG	0.998622	0.988121	1.00923	0.798213
TSPAN11	1.06483	0.939837	1.20644	0.324153
BIN2	0.996419	0.957755	1.03664	0.858987
MGP	0.999671	0.997468	1.00188	0.770387
ARHGDIB	1.00037	0.998453	1.0023	0.702633
CLEC4A	1.02414	0.976653	1.07393	0.324784
KLRB1	0.958219	0.930971	0.986265	0.00373626
DSE	1.03188	0.966174	1.10207	0.349822
ADTRP	1.04279	1.00754	1.07927	0.0169457
BMP5	0.982988	0.882142	1.09536	0.756044
SMOC2	0.994725	0.980028	1.00964	0.486132
LY86	1.00641	0.989773	1.02333	0.452451
C7	0.998948	0.99694	1.00096	0.305069
GZMK	0.996758	0.981673	1.01207	0.676388
ITK	0.876531	0.743715	1.03307	0.115971
ST8SIA4	1.03162	0.981019	1.08483	0.225078
CDX1	0.943826	0.83752	1.06363	0.343011
CD86	1.02213	0.995733	1.04922	0.101081
GNB4	1.02154	0.98231	1.06234	0.286123
ZAP70	0.969958	0.919768	1.02289	0.260513
CYTIP	0.988333	0.957931	1.0197	0.461604
ITGB6	1.06517	1.00611	1.12771	0.0300756
ITGA4	0.989394	0.923143	1.0604	0.763017
PDE1A	0.995747	0.926773	1.06985	0.907365
EFEMP1	1.0004	0.99764	1.00316	0.778086
IL1RL1	0.933423	0.792389	1.09956	0.409737
IL18RAP	0.702339	0.550487	0.89608	0.00447259
WIPF1	1.00587	0.991463	1.02048	0.426664
PLEK	1.00669	0.999435	1.01399	0.0707841
PRRX1	0.989094	0.937046	1.04403	0.690932
PLA2G4A	1.00547	0.950717	1.06338	0.848557
CD2	0.994847	0.985039	1.00475	0.30679
SLAMF1	0.886839	0.75889	1.03636	0.130866
CD48	0.990728	0.97082	1.01104	0.368392
IGSF21	1.0604	1.00158	1.12269	0.0439971
PLA2G2D	0.99123	0.972775	1.01003	0.358275
CR2	1.0014	0.972765	1.03088	0.924563
PTCH2	0.996017	0.977802	1.01457	0.671677
FASLG	0.992894	0.904107	1.0904	0.881396
CSF3R	1.03151	1.01406	1.04926	0.000365119
LTBP2	0.999945	0.990805	1.00917	0.990715
GPR68	0.980392	0.885742	1.08516	0.702245
TECTB	0.969644	0.868428	1.08266	0.583665
CXorf21	1.03982	0.96463	1.12087	0.3079
TNFSF18	1.08627	0.839483	1.40561	0.529134
GLT8D2	0.946548	0.854423	1.04861	0.293031
DUSP4	1.00851	0.988196	1.02925	0.414243
TNFRSF8	1.14737	0.8801	1.4958	0.309624
CRISPLD1	1.02149	0.994426	1.0493	0.12066
TBX4	0.988871	0.96915	1.00899	0.276197
ADCY7	1.09288	0.983986	1.21382	0.0972166
TSHZ3	1.03373	0.972463	1.09886	0.287212
PDZRN3	1.00236	0.944318	1.06396	0.938387
RGSL1	0.928328	0.84786	1.01643	0.107914
CD80	1.11451	0.912952	1.36056	0.286796
BAI2	1.02638	0.969428	1.08667	0.371358
FABP3	0.999951	0.99951	1.00039	0.828241
CCR2	0.993995	0.92541	1.06766	0.86886
CPXM2	0.966253	0.919407	1.01549	0.175765
CXCR4	1.00016	0.996706	1.00362	0.929363
FLT3	0.611896	0.391568	0.956197	0.031035
SASH3	0.997951	0.985031	1.01104	0.757657
FMOD	1.00118	0.99731	1.00506	0.551163
LAX1	0.847549	0.684888	1.04884	0.128168
LY9	0.829687	0.606082	1.13579	0.243904
HS3ST2	0.985783	0.956513	1.01595	0.351793
TWIST1	0.999006	0.989139	1.00897	0.844256
GLIPR2	1.00027	0.992436	1.00817	0.946211
NUDT10	0.98973	0.825068	1.18725	0.911464
PLAU	1.00011	0.997288	1.00294	0.939386
SRGN	1.00075	0.999003	1.00251	0.398835
EGR2	1.00094	0.963481	1.03986	0.961493
HVCN1	1.00924	0.959299	1.06178	0.722452
SSPN	1.00303	0.945045	1.06458	0.920625
ARHGAP9	0.997063	0.959715	1.03586	0.879961
NCKAP1L	1.01396	0.985284	1.04346	0.34365
IL13RA2	1.00303	0.998745	1.00733	0.1661
COL10A1	1.01318	0.974288	1.05362	0.512058
PI3	0.999834	0.99763	1.00204	0.88292
ZNF831	0.608807	0.347244	1.0674	0.0832219
PTGIS	0.99888	0.975541	1.02278	0.925976
ZBP1	0.944639	0.807	1.10575	0.478435
F13A1	1.00484	0.998628	1.0111	0.12697
CPNE5	0.955275	0.875161	1.04272	0.305901
RUNX2	1.04573	0.99659	1.0973	0.0686251
WNT1	0.219805	0.04073	1.18621	0.0781656
GPR18	0.834133	0.642031	1.08371	0.174465
PTGER2	0.976239	0.885826	1.07588	0.627695
IL1B	1.01911	0.958438	1.08362	0.545587
CD70	1.00516	0.985988	1.02471	0.600363
S1PR4	0.956483	0.902794	1.01337	0.131165
CCR7	0.937133	0.872625	1.00641	0.0743612
CFP	0.985619	0.938807	1.03476	0.559581
EVI2A	1.00184	0.97596	1.0284	0.890685
OMG	0.991327	0.954547	1.02952	0.651582
FAM78A	1.02545	0.975041	1.07846	0.328521
RGS13	1.03312	0.918371	1.1622	0.587552
OMD	0.941103	0.845201	1.04789	0.26831
FGD3	1.01682	0.987099	1.04744	0.270392
BCL11B	0.905745	0.758213	1.08198	0.275126
EMR2	1.19522	1.04612	1.36556	0.00870901
FGL2	1.00168	0.989983	1.01352	0.779236
MGAT3	0.940314	0.808456	1.09368	0.424678
GALR3	0.914156	0.806854	1.03573	0.158857
RAC2	0.999826	0.994934	1.00474	0.944408
APOBEC3A	1.21388	1.01221	1.45572	0.0365338
CCDC136	1.21419	1.04324	1.41316	0.012187
LRRC17	0.99994	0.98616	1.01391	0.993215
CHN1	0.999253	0.980469	1.0184	0.938496
WDFY4	0.992947	0.914868	1.07769	0.865488
ISLR	1.00102	0.997805	1.00425	0.533462
LOXL1	1.00078	0.997091	1.00449	0.678138
SIGLEC9	1.05887	1.02255	1.09648	0.00131817
KLK10	0.990736	0.946994	1.0365	0.686246
RIPK3	0.942787	0.86299	1.02996	0.191663
KLHDC7B	0.993293	0.972782	1.01424	0.527322
LSP1	0.997974	0.989128	1.0069	0.65535
TNNT3	0.490966	0.205839	1.17105	0.108726
COL5A1	1.00173	0.997398	1.00608	0.43408
GMFG	0.997883	0.990676	1.00514	0.566534
THEMIS2	1.01088	0.992494	1.0296	0.247938
LILRB2	1.03185	1.00185	1.06274	0.0372535
PYY	1.085	1.02627	1.14709	0.00406448
EMR3	1.19076	1.09557	1.29422	4.00763e-05
SLC6A6	1.00675	0.996588	1.01702	0.193659
GFPT2	1.00895	0.973215	1.046	0.6281
PODNL1	1.06582	1.00734	1.12769	0.0268398
FCRLA	0.988435	0.954045	1.02406	0.519682
EMILIN2	1.02006	0.994326	1.04647	0.127615
TRIM22	0.991245	0.97796	1.00471	0.201467
IGJ	0.998076	0.995252	1.00091	0.182632
CLEC10A	0.993453	0.96633	1.02134	0.641843
RHBG	0.999416	0.997394	1.00144	0.572337
CRP	0.999994	0.999964	1.00002	0.716125
ALOX5AP	1.00414	0.994396	1.01397	0.406515
CHIT1	0.998682	0.991809	1.0056	0.708229
DCLK1	0.967498	0.797353	1.17395	0.737759
POSTN	1.00245	0.997371	1.00756	0.344652
PRAM1	1.00253	0.885278	1.13531	0.968236
GIMAP4	1.00217	0.996369	1.00801	0.463941
ADAMDEC1	0.999949	0.982466	1.01774	0.995508
CD180	1.01854	0.954255	1.08716	0.58074
REG4	0.935268	0.781029	1.11997	0.466732
GSTM5	0.994331	0.973053	1.01608	0.606509
PTPN22	0.954546	0.844624	1.07877	0.456119
IL2RA	1.04759	0.996826	1.10095	0.0665773
DOCK2	1.0107	0.957983	1.06631	0.697006
KLRD1	0.696492	0.41715	1.16289	0.166678
RAB33A	0.976132	0.875672	1.08812	0.662868
SPOCD1	1.05526	1.00902	1.10363	0.0186455
TCN1	0.98866	0.960538	1.01761	0.438596
ANXA1	1.00051	0.996172	1.00487	0.817179
HAVCR2	1.00438	0.993712	1.01517	0.422179
TBX3	0.99961	0.99599	1.00324	0.83295
TESPA1	0.879667	0.71542	1.08162	0.224033
FAIM2	1.06538	0.822225	1.38045	0.631834
STX11	1.02587	0.993261	1.05955	0.121213
GLUL	0.999961	0.999881	1.00004	0.345692
FAM129A	0.999984	0.987661	1.01246	0.997972
GPR55	0.769927	0.390104	1.51956	0.451009
DOCK10	1.02646	0.974552	1.08113	0.323939
WNT10A	1.03934	0.858805	1.25783	0.691834
STAB2	0.979198	0.858876	1.11638	0.753326
VILL	0.890622	0.743812	1.06641	0.207539
LCP1	1.00216	0.999463	1.00486	0.116742
GPNMB	0.999857	0.998174	1.00154	0.867486
IL6	0.973595	0.904336	1.04816	0.477254
AOAH	1.00603	0.991706	1.02056	0.411414
MYO1G	1.002	0.93341	1.07562	0.956017
TM6SF1	1.06159	0.926953	1.21578	0.387723
GALNT5	1.02045	0.924195	1.12673	0.688808
BLK	0.874708	0.679081	1.12669	0.300006
IL10	1.02707	0.897563	1.17527	0.697693
CCL21	0.999012	0.997485	1.00054	0.205192
SIT1	0.984047	0.948998	1.02039	0.384807
CD72	1.00849	0.978307	1.03961	0.585436
TLR2	1.01842	1.00195	1.03517	0.0282682
IL18BP	1.01028	0.992275	1.0286	0.265054
TMPRSS4	1.10383	0.915067	1.33153	0.301897
MMP7	1.00172	0.999897	1.00356	0.0644098
CASP5	1.205	1.03333	1.40518	0.0174015
PLCB2	1.01237	0.968625	1.05808	0.585471
STRA6	1.07675	1.01177	1.14589	0.0198884
IFI44L	0.998223	0.981441	1.01529	0.837073
EMILIN1	0.999826	0.996354	1.00331	0.921979
CHRNA1	0.998602	0.982859	1.0146	0.86299
CILP	0.965921	0.856658	1.08912	0.57132
CXCL9	0.999338	0.997273	1.00141	0.530421
KIAA1644	1.0616	0.928652	1.21357	0.381233
PARVG	1.015	0.962254	1.07063	0.584593
CD27	0.995393	0.978045	1.01305	0.606762
GLIPR1	1.00576	0.996004	1.01562	0.247993
LGR5	0.994488	0.981992	1.00714	0.391628
LUM	0.999121	0.997123	1.00112	0.388878
GPR84	1.06903	1.02601	1.11384	0.00144543
SMIM2	0.919507	0.671257	1.25957	0.601208
RTN1	1.0366	0.989884	1.08552	0.126566
GPR65	1.01223	0.914147	1.12084	0.815159
DUOXA2	0.999591	0.997013	1.00218	0.756184
DUOX2	0.999947	0.998875	1.00102	0.922918
FGF7	0.92224	0.785724	1.08248	0.321993
PSTPIP1	0.982085	0.928204	1.03909	0.530061
BCL2A1	1.0031	0.987257	1.0192	0.703179
HAPLN3	1.01798	0.991321	1.04535	0.188121
ITGAX	1.00654	0.985397	1.02813	0.547442
IGSF6	1.00412	0.988519	1.01997	0.606619
CMTM2	1.05793	0.894409	1.25134	0.510972
CDH11	1.00652	0.977485	1.03641	0.663603
RHBDL3	1.01384	0.999311	1.02858	0.061988
PIK3R5	1.01067	0.924905	1.10438	0.814603
VAV1	1.00568	0.977085	1.03511	0.700398
COL6A1	1.00006	0.999042	1.00108	0.907054
COL6A2	1.00025	0.999421	1.00108	0.556002
EMP3	1.00134	0.999019	1.00367	0.257877
MYO1F	1.0131	0.978461	1.04897	0.463355
SIGLEC10	1.02854	0.99982	1.05808	0.0514718
FCN3	0.995646	0.989269	1.00206	0.183201
C1orf162	1.00566	0.988417	1.02321	0.522345
CD53	1.00071	0.996704	1.00474	0.727448
DPT	0.99672	0.989724	1.00377	0.36064
FCGR2A	1.01857	1.00719	1.03008	0.00133309
FCRL5	0.69504	0.43998	1.09796	0.118908
ECM1	1.00027	0.987853	1.01284	0.966139
CTSK	0.999826	0.999058	1.00059	0.657324
PTPN7	0.988592	0.939985	1.03971	0.65557
ABHD1	1.00869	0.96756	1.05157	0.68367
ITGA9	0.99983	0.972474	1.02796	0.99041
BOC	0.810083	0.634989	1.03346	0.0900584
SLIT2	1.00717	0.949582	1.06826	0.811936
PLAC8	1.01746	0.99744	1.03787	0.0877938
SNCA	1.04178	0.926238	1.17173	0.494988
ANK2	1.01148	0.896098	1.14172	0.853452
RNF175	1.04902	0.941421	1.16891	0.386116
GZMA	0.995245	0.986921	1.00364	0.265975
CRHBP	0.988644	0.970007	1.00764	0.239545
CXCL14	0.996803	0.99024	1.00341	0.34213
TIMD4	1.03165	0.985269	1.08022	0.184294
C1QTNF2	1.04138	0.93829	1.1558	0.445824
DOK3	1.03665	0.990744	1.08468	0.119338
FGD2	1.05343	0.956857	1.15975	0.288687
ENSG00000146197	0.976782	0.836557	1.14051	0.766381
GPR174	0.94741	0.821715	1.09233	0.456948
IL2RG	1.00298	1.00029	1.00568	0.0299151
DOK2	1.0098	0.995776	1.02403	0.17166
SNTG1	0.96157	0.860141	1.07496	0.490803
DNAJC5B	0.982036	0.831755	1.15947	0.830619
NTRK2	0.988533	0.941978	1.03739	0.639359
RP11-35N6.1	0.996897	0.989491	1.00436	0.414065
HTR7	1.02697	0.847626	1.24426	0.785814
PLEKHS1	1.00584	0.968307	1.04484	0.763943
ADAM12	1.00164	0.979257	1.02453	0.887223
LRRC4C	0.95336	0.639424	1.42143	0.814699
PAMR1	0.999295	0.984351	1.01447	0.926908
ADAM33	1.02953	0.981814	1.07956	0.229386
MS4A2	0.879296	0.67705	1.14195	0.334754
JPH2	0.995018	0.968486	1.02228	0.717191
FERMT3	1.0057	0.998091	1.01338	0.142376
FCGR1A	1.02911	1.00919	1.04942	0.00401634
ADRA2A	0.991001	0.968398	1.01413	0.442546
GPM6A	0.992816	0.88292	1.11639	0.904116
CD226	0.786273	0.523198	1.18163	0.247294
RGS18	1.0729	0.957238	1.20253	0.226653
ADAMTS12	1.00162	0.969068	1.03526	0.923639
PTPRO	1.25979	1.03755	1.52963	0.0196891
ANO4	0.947654	0.735626	1.22079	0.67735
VENTX	1.15409	0.934659	1.42504	0.182879
BEND6	1.0134	0.862673	1.19046	0.871317
KCNE4	1.00079	0.987093	1.01468	0.910174
ARL11	1.14493	1.0281	1.27503	0.0137143
CAMK4	0.651413	0.358445	1.18383	0.159644
PRDM8	0.95558	0.597657	1.52785	0.849497
JAKMIP1	0.999421	0.815047	1.2255	0.99556
BANK1	0.983364	0.901749	1.07237	0.704315
PTPRR	1.14331	0.700345	1.86645	0.592246
PLA2R1	1.09085	0.940526	1.26521	0.250363
CD96	0.944561	0.870297	1.02516	0.172209
C16orf89	0.999782	0.998799	1.00077	0.664344
CD8A	0.993497	0.977444	1.00981	0.432521
MCOLN2	1.04471	0.980928	1.11263	0.173576
ANKFN1	0.999703	0.987208	1.01236	0.963089
ABI3BP	0.966213	0.893839	1.04445	0.386901
LRRK1	1.04709	0.914422	1.199	0.505612
FAM167A	0.982962	0.938654	1.02936	0.465239
GBP5	1.0048	1.00021	1.00941	0.0404941
SAMSN1	1.0202	0.989847	1.05148	0.194378
SLC7A7	1.02097	1.00637	1.03578	0.00473277
VSIG4	1.00583	1.00209	1.00957	0.00218775
SLA	0.99634	0.959863	1.0342	0.847209
GDF6	1.09439	1.01634	1.17844	0.0168853
MS4A1	0.973116	0.907759	1.04318	0.442341
NMNAT2	0.991303	0.945588	1.03923	0.716889
IL34	1.00756	0.997067	1.01817	0.158517
CREB3L1	1.00452	1.00002	1.00903	0.049206
CD1C	0.985725	0.948176	1.02476	0.468109
CD1B	1.00393	0.904259	1.11459	0.941379
CD1E	0.965833	0.888154	1.05031	0.416428
NCF1	1.02777	0.967956	1.09129	0.370567
SLAMF8	1.00594	0.998171	1.01377	0.134355
C1QC	1.0004	1.00007	1.00072	0.0167947
CLIC6	0.994192	0.97344	1.01539	0.588309
ENSG00000159753	0.873565	0.716138	1.0656	0.182439
ABR	1.00069	0.989152	1.01236	0.907195
LYPD5	1.08699	0.785835	1.50355	0.614314
TNFRSF13C	0.931277	0.80042	1.08353	0.356749
PTGIR	0.985393	0.926006	1.04859	0.642669
UBASH3A	0.923407	0.807939	1.05538	0.242344
GAB3	0.964134	0.845347	1.09961	0.586128
ITGB2	1.00365	0.999341	1.00797	0.0970518
CD3G	0.995624	0.942833	1.05137	0.874636
CCR5	0.997563	0.961622	1.03485	0.896311
FCRL3	0.944185	0.798635	1.11626	0.501352
HK3	1.02397	1.00236	1.04605	0.0295513
SCGB3A1	0.976457	0.916595	1.04023	0.460454
COX7A1	0.999825	0.999204	1.00045	0.579635
PLXDC1	1.00289	0.982939	1.02325	0.778306
IKZF3	0.973118	0.917032	1.03264	0.36829
SIGLEC11	1.13021	0.990786	1.28925	0.0684304
TREML1	1.30897	1.06618	1.60705	0.0101065
SCIMP	1.01939	0.949035	1.09495	0.59871
ZG16B	1.00657	0.994144	1.01915	0.301491
PDPN	1.01702	0.989862	1.04492	0.221705
LAPTM5	1.00107	0.999629	1.0025	0.146199
SYNC	1.0747	0.993412	1.16264	0.0726131
MXRA8	0.999773	0.997566	1.00198	0.840338
CADM3	0.996534	0.927168	1.07109	0.924864
NLRP3	1.12178	0.984319	1.27843	0.0848899
SLAMF6	0.954112	0.896162	1.01581	0.141743
OLFML2B	1.00087	0.997518	1.00424	0.610401
IL24	0.977927	0.905644	1.05598	0.568864
FAIM3	0.991947	0.96876	1.01569	0.502873
C1QTNF7	0.913889	0.698697	1.19536	0.510971
TNFAIP8L2	1.00993	0.993383	1.02674	0.241152
ARHGAP25	1.00164	0.967216	1.03728	0.927032
S100A12	0.98007	0.887407	1.08241	0.691177
COL6A3	1.00107	0.9963	1.00587	0.659994
IGFN1	0.999234	0.995643	1.00284	0.67668
CXCR1	1.03405	0.919594	1.16276	0.575847
EOMES	0.958441	0.859363	1.06894	0.445801
FBLN2	0.998604	0.995176	1.00204	0.425621
FCRL1	0.979947	0.867748	1.10665	0.744038
MNDA	1.01145	0.990431	1.03291	0.288057
PYHIN1	0.922998	0.817644	1.04193	0.195048
IFI16	1.00157	0.993877	1.00933	0.689739
AIM2	1.01525	0.980162	1.0516	0.398994
ICOS	0.988163	0.885598	1.10261	0.831345
CD200R1	1.05727	0.933673	1.19724	0.37993
CXCL3	1.02345	0.971484	1.0782	0.383274
CXCL5	1.00263	1.00069	1.00457	0.00782978
CXCL1	1.00041	0.998963	1.00185	0.581877
CPA3	0.991396	0.972734	1.01042	0.372799
PLB1	1.32112	1.10105	1.58519	0.00274101
CCR1	1.02182	1.00122	1.04285	0.0377463
FBXO40	0.976294	0.857421	1.11165	0.717222
HAND2	0.997844	0.981835	1.01411	0.793661
TMEM155	1.01394	0.924396	1.11216	0.769183
SLC45A2	1.01063	0.957949	1.06622	0.698564
GPX8	1.00214	0.984812	1.01978	0.810073
ACSL6	0.970688	0.937496	1.00505	0.0937491
SAMD3	0.717331	0.383751	1.34088	0.297918
TMEM200A	0.986087	0.890182	1.09233	0.788411
PI16	0.967589	0.881759	1.06177	0.486929
GPR85	1.26414	1.02162	1.56423	0.0310202
SYTL3	0.956389	0.8682	1.05354	0.366319
TAGAP	0.993836	0.944721	1.0455	0.811026
COL1A2	1.00038	0.999541	1.00121	0.376607
FNDC1	0.999035	0.97018	1.02875	0.948499
DCSTAMP	1.02759	0.889219	1.1875	0.712221
GEM	0.997183	0.986849	1.00763	0.595668
SYK	1.01669	0.998429	1.03529	0.0734582
TMEM71	0.804685	0.588222	1.1008	0.174073
MAMDC2	0.974112	0.872044	1.08813	0.642322
SVEP1	0.975794	0.911968	1.04409	0.477734
TRPV6	1.02581	0.97745	1.07655	0.301052
CYBB	1.006	1.00072	1.01132	0.0259901
FIGF	0.998008	0.991559	1.0045	0.546675
DDX26B	0.976856	0.867046	1.10057	0.700336
PHYHIPL	1.00598	0.994813	1.01728	0.295097
FOLR2	1.00273	0.998721	1.00676	0.182139
DACT1	1.00649	0.950281	1.06601	0.825492
CLEC1B	0.941566	0.840786	1.05443	0.297208
ADAMTS15	0.998374	0.96769	1.03003	0.918617
FBN1	1.00105	0.982536	1.01992	0.911989
SPIC	0.977308	0.788771	1.21091	0.833739
CLMP	1.02983	0.996603	1.06417	0.078987
PLD4	1.04265	0.953349	1.14033	0.360577
MFAP4	0.997771	0.993823	1.00173	0.26994
PRKCB	1.00794	0.945882	1.07407	0.807315
CLEC4E	1.01058	0.952062	1.07269	0.729525
GPR182	0.811177	0.659543	0.997673	0.0474758
GREM1	1.01775	0.997084	1.03884	0.0927796
MS4A7	1.00145	0.985092	1.01808	0.863168
MS4A14	1.07577	0.898648	1.28781	0.42619
MAP1A	0.998878	0.981726	1.01633	0.898875
MEI1	0.839621	0.686921	1.02627	0.0878563
GNGT2	1.03752	0.947154	1.1365	0.42826
SNX20	0.988076	0.920221	1.06093	0.741045
DPEP2	0.975367	0.858028	1.10875	0.702925
GNG8	0.996064	0.898	1.10484	0.940547
FAM129C	0.738153	0.410249	1.32815	0.311037
AXL	1.01293	0.998194	1.02789	0.0857548
LAIR1	1.02143	1.00387	1.0393	0.0165552
TMIGD2	0.758908	0.597817	0.963406	0.0234387
KLK4	0.998916	0.987803	1.01015	0.849257
IGFBP6	0.999655	0.996923	1.00239	0.804582
CD300C	1.079	1.01119	1.15135	0.0216667
CD300A	1.02653	1.00496	1.04857	0.0156624
MGAT5B	0.979644	0.853504	1.12443	0.769954
TMC8	0.990092	0.959225	1.02195	0.537788
GSDMA	1.13909	1.00873	1.28629	0.0357132
CASKIN1	1.54436	1.29098	1.84748	2.00198e-06
NLRC3	0.898436	0.765629	1.05428	0.189424
SCARA5	0.93096	0.847078	1.02315	0.137558
PNOC	0.7544	0.523237	1.08769	0.131119
PTGDR	0.75375	0.502483	1.13066	0.171814
RHOH	0.965524	0.870598	1.0708	0.506406
KLHL30	1.01905	0.991388	1.04748	0.178964
RAB31	1.01111	0.99681	1.02562	0.12841
TNXB	0.990985	0.936876	1.04822	0.751908
COL3A1	1.00016	0.999852	1.00046	0.311635
GFRA2	0.915857	0.767721	1.09258	0.328865
IL7R	0.969258	0.940626	0.998762	0.0412598
D4S234E	0.432035	0.203665	0.916477	0.0287225
INPP5D	0.988782	0.954541	1.02425	0.530385
LGALS9	1.00648	1.00032	1.01268	0.0393277
SIGLEC7	1.06859	1.00305	1.13842	0.0399368
PARM1	0.992522	0.975202	1.01015	0.403331
CXCL11	1.00786	0.999219	1.01657	0.0747247
P2RY12	1.00095	0.849703	1.17911	0.990954
PTAFR	1.00951	0.991785	1.02756	0.294927
RNASE6	1.00511	0.997562	1.01272	0.185001
CXCL8	1.00159	0.99963	1.00355	0.11193
CD52	0.997302	0.993269	1.00135	0.191424
HTRA4	1.01881	0.874668	1.18671	0.810765
GPR183	1.0069	0.993574	1.02041	0.311734
ZEB2	1.00573	0.939978	1.07607	0.868525
ANTXR1	0.998949	0.984667	1.01344	0.886236
PCDH7	1.00812	0.770537	1.31897	0.952942
TMEM154	0.924111	0.805457	1.06024	0.260318
HSPB2	0.9974	0.980691	1.01439	0.762592
MZB1	0.988806	0.976683	1.00108	0.0736878
EMB	0.998366	0.974312	1.02301	0.895408
OSCAR	1.02837	0.987243	1.07121	0.179136
PYGO1	1.05602	0.780209	1.42933	0.724147
FPR2	1.31984	0.943645	1.84602	0.104992
FPR1	1.02013	0.997855	1.04289	0.076847
PTGER4	1.02888	0.999968	1.05864	0.0502612
NMUR1	1.00968	0.910617	1.11951	0.854977
PIK3CD	1.01264	0.986628	1.03934	0.344114
GPR82	1.39702	1.09266	1.78615	0.00765761
GPR34	1.0253	1.00668	1.04425	0.00752657
RASGRP4	1.31486	1.08812	1.58885	0.00458991
COL8A2	1.00078	0.982904	1.01898	0.932312
C3AR1	1.01145	0.999127	1.02392	0.0687139
MAL	0.923823	0.800207	1.06654	0.279662
LRRC15	1.01369	0.941428	1.0915	0.718549
CALB2	1.02387	1.00122	1.04703	0.0387306
CCL11	1.04002	0.964125	1.12189	0.310123
CXCR6	0.962567	0.906758	1.02181	0.210597
TPSAB1	0.996192	0.98926	1.00317	0.284124
CLEC7A	1.03137	0.984054	1.08097	0.197351
CLEC12A	1.00998	0.873607	1.16764	0.893264
RCAN2	0.994574	0.979764	1.00961	0.477283
IL16	0.965819	0.889005	1.04927	0.410775
SYNPO2	0.974684	0.930792	1.02064	0.27538
CTSW	0.996813	0.980302	1.0136	0.707974
RASGRP1	0.981283	0.886521	1.08617	0.715369
KLHL6	0.942162	0.822279	1.07952	0.390895
THEMIS	0.893103	0.71288	1.11889	0.325558
CCL19	0.998595	0.996404	1.00079	0.209501
MYEOV	0.999172	0.995066	1.0033	0.693363
BNC2	1.04857	0.92007	1.19503	0.477038
HPSE	1.07549	1.01818	1.13604	0.00919647
LRRN3	0.992083	0.736447	1.33645	0.958302
CYSLTR1	0.901112	0.67175	1.20879	0.487199
ABCD2	0.840307	0.528721	1.33552	0.461709
C1QB	1.00036	1.00002	1.00069	0.0384699
C1QA	1.00028	0.999947	1.00062	0.0983308
NDNF	0.973683	0.755972	1.25409	0.836368
SAA1	0.999993	0.999976	1.00001	0.434567
XCR1	0.760187	0.537448	1.07524	0.121165
HSPB7	1.0256	0.988636	1.06394	0.177123
SUSD5	0.985134	0.937573	1.03511	0.553014
PHOSPHO1	1.00094	0.594533	1.68517	0.99717
C1QTNF1	0.999731	0.998519	1.00094	0.663053
NRROS	1.02539	0.985721	1.06665	0.212955
TLR10	1.03298	1.00241	1.06448	0.0342592
GSTA3	1.0425	0.947379	1.14718	0.393843
SELP	0.937357	0.868799	1.01132	0.0950435
SLC16A11	0.995058	0.991124	0.999009	0.0142625
PODN	0.995413	0.982264	1.00874	0.49805
GCSAM	1.00547	0.846769	1.1939	0.950415
CMKLR1	1.01189	0.978594	1.04631	0.48875
EMR1	1.03282	0.984529	1.08347	0.18626
GPR171	0.93184	0.853073	1.01788	0.117193
CHST2	0.999732	0.982659	1.0171	0.975711
DES	1.00166	0.999833	1.00349	0.0749879
UCP2	1.00151	0.997062	1.00598	0.506138
FOSL1	1.00579	0.993569	1.01817	0.354479
GAPT	1.00665	0.926191	1.09411	0.876019
ZNF683	1.00125	0.92047	1.08912	0.976738
KCNA3	0.689448	0.434798	1.09324	0.113886
SAMD9L	1.01269	0.992125	1.03368	0.228337
CD19	0.964737	0.890773	1.04484	0.377712
ZBED2	1.02262	0.878543	1.19034	0.772778
CD163	1.0076	1.00174	1.01349	0.0109099
SHISA3	0.980754	0.945362	1.01747	0.300042
KCTD12	1.00118	0.989922	1.01257	0.837848
HLA-DQB1	0.999544	0.996694	1.0024	0.754202
EGR3	0.931067	0.809499	1.07089	0.317053
SLITRK4	1.08731	0.819078	1.44338	0.562493
CIITA	1.00167	0.947876	1.05851	0.952889
FOXS1	1.00536	0.996724	1.01408	0.224424
GPBAR1	0.995262	0.971572	1.01953	0.699244
CCR8	0.894537	0.646081	1.23854	0.502012
SSC5D	1.04025	0.994478	1.08814	0.085652
FZD2	1.01619	0.997512	1.03521	0.0897505
HCLS1	1.00132	0.991439	1.01131	0.793853
GAS1	1.00057	0.956801	1.04634	0.980147
PRF1	0.991336	0.973834	1.00915	0.338296
BHLHE22	0.975477	0.857678	1.10945	0.705339
CXCR2	1.04635	0.895656	1.2224	0.567971
FCRL6	0.960164	0.828836	1.1123	0.588018
TMEM132E	0.847943	0.641015	1.12167	0.247863
FDCSP	1.0001	0.999212	1.00099	0.827767
P2RY13	1.00994	0.95635	1.06654	0.722084
SLC9A9	1.02941	0.998091	1.06171	0.0659552
TIGIT	0.983536	0.921087	1.05022	0.619896
UNC5C	0.968114	0.783939	1.19556	0.763427
PRAMEF8	0.9001	0.73101	1.1083	0.321504
CLEC4G	0.997663	0.98569	1.00978	0.704125
CSF1R	1.00705	1.00175	1.01237	0.00901049
PAPPA	1.20691	0.871681	1.67106	0.257312
PLCXD3	1.04562	0.928329	1.17773	0.462422
LCK	0.985569	0.957704	1.01424	0.320496
SLC8A1	1.16756	0.915198	1.48951	0.212476
PCP4	0.999022	0.992256	1.00583	0.777855
TMEM119	0.993056	0.976219	1.01018	0.424492
CCBE1	1.05403	0.948436	1.17139	0.328549
GPR132	1.0065	0.908286	1.11534	0.90151
PCBP3	0.988479	0.923805	1.05768	0.737145
CCR4	0.978058	0.861583	1.11028	0.731642
C1orf64	1.01435	0.980408	1.04947	0.411933
SH2D1A	0.963292	0.897295	1.03414	0.301699
ADAP2	1.03457	1.0159	1.05358	0.000253567
TACSTD2	1.00264	0.998752	1.00655	0.183525
CLECL1	1.02986	0.898021	1.18105	0.673794
COLEC10	0.990405	0.968574	1.01273	0.396555
SOCS3	0.998708	0.996022	1.0014	0.346909
LPAR5	1.06209	1.00732	1.11984	0.0257595
TMEM173	0.998159	0.987618	1.00881	0.733677
C14orf180	1.00163	0.976366	1.02754	0.900786
TUSC5	0.999505	0.997286	1.00173	0.662096
FMNL1	1.00507	0.981142	1.02957	0.681004
RFX6	1.14414	1.02308	1.27952	0.0182824
NOTUM	0.999891	0.999246	1.00054	0.74024
WBSCR17	0.983039	0.933533	1.03517	0.516422
GPRIN3	0.978826	0.934418	1.02534	0.366303
MUC1	0.99972	0.995351	1.00411	0.900214
PDE6G	0.986106	0.919972	1.05699	0.692815
LSAMP	0.956965	0.826049	1.10863	0.557839
AHNAK2	0.996909	0.976614	1.01763	0.768028
NTF3	0.974659	0.840474	1.13027	0.734125
IKZF1	0.97734	0.911541	1.04789	0.519228
EVI2B	0.998868	0.986334	1.01156	0.860512
C16orf54	0.926394	0.845966	1.01447	0.0989521
CD300LF	1.01049	0.962557	1.06081	0.67388
BTLA	0.792371	0.533559	1.17672	0.248737
THBS2	0.999652	0.995369	1.00395	0.873574
CD300E	1.06648	0.924098	1.2308	0.378683
GNG2	1.00371	0.963544	1.04555	0.858906
ARHGAP30	0.999823	0.981855	1.01812	0.984699
CXCR3	0.987523	0.954261	1.02194	0.472598
LILRB4	1.01849	0.998639	1.03874	0.0681003
QRFPR	0.504838	0.242028	1.05302	0.0684204
GPR141	1.23366	0.791729	1.92228	0.353432
LILRA5	1.03759	0.984281	1.09378	0.17032
WDR86	0.996938	0.981289	1.01284	0.70397
FPR3	1.00743	0.99523	1.01979	0.23364
C11orf96	0.996803	0.991749	1.00188	0.217064
SEMA4D	1.02061	0.960124	1.08492	0.512743
CLEC17A	0.866641	0.553693	1.35647	0.531208
COL14A1	0.994574	0.985012	1.00423	0.269737
NHS	1.11754	0.809081	1.54361	0.500069
C19orf35	1.44051	0.893121	2.32338	0.134519
SELL	0.994069	0.975519	1.01297	0.535929
CERKL	1.01057	0.959551	1.06431	0.690669
PRELP	0.998289	0.992801	1.00381	0.542531
FAM26F	1.00418	0.998883	1.0095	0.122193
PTPLAD2	1.10597	0.901269	1.35717	0.334777
C9orf152	0.999783	0.973478	1.0268	0.987269
PLAC9	0.999744	0.998741	1.00075	0.616605
C6orf222	0.977191	0.906239	1.0537	0.548554
NCR1	0.878446	0.675425	1.14249	0.333784
PAX5	0.941947	0.776045	1.14331	0.545153
HLA-DRB1	0.999993	0.999758	1.00023	0.956834
S100A4	1.00074	0.999166	1.00232	0.356656
SEMA4A	1.00684	0.954362	1.06219	0.803001
GREB1	1.00337	0.979083	1.02826	0.787859
SIRPB2	1.03112	0.88317	1.20386	0.698161
RYR1	1.06743	1.02428	1.11239	0.00193977
SFTA2	1.00842	0.968429	1.05006	0.684684
SPTSSB	1.01841	1.00333	1.03373	0.0165717
LAMA2	0.98973	0.960762	1.01957	0.495813
HRH1	1.02407	0.979899	1.07022	0.290406
TLR7	1.05987	0.984423	1.14109	0.122765
HLA-DQA1	1.00111	0.996541	1.00571	0.633779
TMEM26	1.38454	0.982774	1.95056	0.0628009
FAM163B	1.00204	0.963943	1.04165	0.917799
GAL3ST4	1.02767	1.00616	1.04965	0.0114495
TPSB2	0.995378	0.986405	1.00443	0.316056
C5AR1	1.01165	0.994438	1.02916	0.185901
DIO3	0.937216	0.844937	1.03957	0.220156
SPN	0.976242	0.915255	1.04129	0.465054
GZMM	0.998381	0.97597	1.02131	0.888742
ELANE	0.866094	0.605692	1.23845	0.430758
MFAP5	0.956281	0.772614	1.18361	0.681203
MPEG1	0.999987	0.99028	1.00979	0.997919
PDCD1LG2	0.999418	0.970677	1.02901	0.968831
CFD	1.00004	0.997446	1.00264	0.976034
MAP1LC3C	0.999902	0.928892	1.07634	0.997929
CLEC9A	0.720097	0.46036	1.12638	0.150269
KEL	0.997477	0.989621	1.0054	0.531251
FCGR1B	1.20844	1.05941	1.37843	0.00481257
LPAR1	1.00344	0.972633	1.03523	0.828926
CSF2RA	1.02965	0.991954	1.06879	0.124669
HLA-DRB5	0.999873	0.999261	1.00049	0.683749
PLN	0.947939	0.883967	1.01654	0.133674
C2CD4A	1.00341	0.993576	1.01334	0.498214
ITGBL1	0.986435	0.948737	1.02563	0.492074
EGFL6	1.107	0.988254	1.24001	0.079112
APCDD1L	1.03515	0.980191	1.09319	0.214556
RCSD1	1.00549	0.975129	1.03679	0.726432
FAM169A	0.989738	0.950288	1.03083	0.619183
CD247	0.959936	0.901162	1.02254	0.204646
CD3E	0.992066	0.978447	1.00587	0.258726
L1CAM	1.01263	0.918299	1.11664	0.801428
CR1	1.07532	0.807403	1.43214	0.619402
FCGR3A	1.00276	1.00091	1.00461	0.00342086
CXorf65	0.905624	0.701922	1.16844	0.445743
HLA-DOA	1.0029	0.993204	1.0127	0.558652
HLA-DRA	1.00005	0.999898	1.0002	0.524111
SP5	1.00183	0.996755	1.00693	0.480361
AIF1	1.00284	0.999805	1.00588	0.0666894
NCR3	0.893036	0.782019	1.01981	0.0948634
LST1	1.00439	0.988326	1.02072	0.594344
CD177	1.00655	0.997516	1.01567	0.155796
SLFN12L	0.669859	0.419032	1.07083	0.0941175
MT1M	0.999253	0.997979	1.00053	0.250869
SAMD9	1.00689	0.975233	1.03956	0.673726
CRLF2	0.988553	0.95055	1.02808	0.56487
ARRDC5	0.86711	0.484195	1.55284	0.63149
ACKR1	0.982937	0.953867	1.01289	0.261184
GIMAP1	0.953697	0.888943	1.02317	0.186321
GPSM3	1.00051	0.993206	1.00787	0.891015
KLRK1	0.761885	0.445626	1.30259	0.320281
CPEB1	0.991355	0.932501	1.05392	0.780975
MS4A4E	1.04739	0.765385	1.43331	0.772334
KCNU1	0.999027	0.983792	1.0145	0.901239
HBD	0.979106	0.920686	1.04123	0.501141
HLA-DPB1	1.00011	0.999195	1.00103	0.80819
LTA	0.964362	0.850051	1.09405	0.572948
HLA-DPA1	1.00096	0.999004	1.00291	0.33758
HLA-DQB2	1.00587	0.999849	1.01193	0.0560296
NFAM1	1.02764	0.983255	1.07404	0.226124
HLA-DQA2	1.00269	0.99963	1.00577	0.084858
APOBEC3G	0.997617	0.957883	1.039	0.908403
LILRA4	0.868804	0.656849	1.14915	0.324314
LILRA2	1.33099	1.09336	1.62026	0.00437938
TNFRSF13B	0.73738	0.431098	1.26127	0.265962
PNMA2	1.11715	1.0575	1.18016	7.59382e-05
INMT	0.991877	0.977988	1.00596	0.256904
PLEKHO2	1.00595	0.99653	1.01547	0.216423
AMACR	0.999384	0.995821	1.00296	0.735331
PEG10	1.00013	0.999597	1.00065	0.640443
HLA-DMB	1.0044	0.99624	1.01263	0.291493
APOBEC3C	1.00101	0.992885	1.00919	0.808762
INSL3	0.9969	0.855151	1.16214	0.968347
FMN1	1.16131	0.98863	1.36416	0.0686451
TMEM158	1.00365	1.00023	1.00708	0.0365804
FOXD1	1.02845	0.969363	1.09114	0.352766
SIGLEC14	1.04143	0.979656	1.10709	0.193216
SIGLEC12	1.0277	0.964291	1.09527	0.400431
SAA2-SAA4	0.999748	0.999258	1.00024	0.313979
TIFAB	1.03433	0.67414	1.58697	0.877173
CLEC5A	1.15423	1.04554	1.27422	0.0044751
MMP12	1.00011	0.993848	1.00641	0.972426
SPIB	1.00395	0.999824	1.00808	0.0606454
RASL10B	0.994813	0.98703	1.00266	0.194429
CCL5	0.999284	0.997086	1.00149	0.523882
MILR1	1.03922	0.998839	1.08123	0.0571022
CCL4	1.0042	0.988676	1.01997	0.598033
CCL18	0.998076	0.988736	1.0075	0.688131
CRIP1	1.01822	0.783429	1.32337	0.892613
